# Supplementary material
Source: ML conference proceedings conference paper supplement (https://openreview.net/forum?id=dAYodxl90f)
Supplement: supplementary_material [file 2024012408_acc.xlsx]

## Sheet: Sheet1
m2	m3	m4	m8	y5m	y5l	y5x
0	0	0	0	0	0	0
0	0	0.144063	0.106646	0.280841	0.101923	0.412208
0	0.809669	0	0	0	0	0
0.219173	0	0	0.272521	0.284141	0	0
0.550418	0.864128	0.928959	0.909733	0.933817	0.91511	0.949363
0.37245	0.231204	0.232347	0.423212	0.36628	0.351526	0.394431
0.186445	0.381245	0.2906	0.504636	0.554589	0.462317	0.870511
0.215035	0.55668	0.586021	0.870061	0.586739	0.556144	0.603811
0.439924	0.544495	0.556725	0.573764	0.643194	0.598128	0.623255
0.34303	0.869421	0.945573	0.935382	0.941098	0.906395	0.935426
0.327604	0.524093	0.717976	0.537628	0.545189	0.505502	0.714208
0.574323	0.652085	0.894081	0.862372	0.673387	0.645512	0.70285
0.315062	0.488191	0.855466	0.704992	0.689231	0.650493	0.715119
0.394931	0.685988	0.651743	0.861186	0.69338	0.648043	0.710513
0.234939	0.331236	0.601859	0.683231	0.62831	0.572844	0.731553
0.35394	0.671169	0.729017	0.707172	0.746303	0.690301	0.890623
0.170403	0.433847	0.249627	0.383853	0.501246	0.329102	0.46296
0.363717	0.539712	0.706361	0.806628	0.880784	0.760847	0.825234
0.299877	0.438175	0.661874	0.58497	0.53928	0.645668	0.689975
0.114729	0.338053	0.569247	0.559902	0.659583	0.54182	0.598718
0.269788	0.449598	0.362249	0.697963	0.569216	0.506094	0.633809
0.393798	0.502273	0.518233	0.513176	0.520327	0.490969	0.516422
0.140361	0.47037	0.523642	0.52128	0.630457	0.829559	0.860528
0.26821	0.415966	0.334884	0.329653	0.394943	0.298371	0.384747
0.181429	0.345793	0.404252	0.576053	0.453825	0.592926	0.611122
0	0	0.323878	0.73038	0.415776	0.696246	0.466027
0.295218	0.488055	0.666329	0.681484	0.708554	0.853476	0.848092
0.223998	0.402567	0.54908	0.601107	0.57052	0.535622	0.571162
0.261543	0.594817	0.692197	0.763015	0.559278	0.511275	0.64823
0.241273	0.465088	0.493724	0.593844	0.527259	0.490906	0.539215
0.322377	0.600851	0.581841	0.854127	0.60998	0.592371	0.631191
0.587554	0.582678	0.291126	0.570364	0.625917	0.566438	0.612737
0	0	0.31494	0.334437	0	0	0.165694
0.162212	0.160325	0.189583	0.308938	0.171342	0.132402	0.166758
0	0.33319	0.389879	0.422997	0.408133	0.391436	0.434176
0.40275	0.45944	0.455347	0.45567	0.909483	0.807654	0.921172
0.217123	0.332537	0.41309	0.714897	0.406826	0.551094	0.574127
0.0649943	0.41671	0.451837	0.499814	0.689764	0.530716	0.601859
0.150823	0.317114	0.377901	0.519077	0.473007	0.427961	0.474225
0.261414	0.256769	0.414632	0.514757	0.538111	0.601603	0.721533
0.278894	0.395845	0.573425	0.717485	0.675137	0.444792	0.659885
0.299151	0.347754	0.317907	0.543335	0.460417	0.304521	0.34979
0.52439	0.793854	0.890643	0.802571	0.907312	0.785359	0.929688
0.357178	0.493147	0.602566	0.578313	0.520906	0.490338	0.657403
0.831551	0.892484	0.954687	0.958435	0.937198	0.815145	0.947032
0.808317	0.905649	0	0.833412	0.956903	0.814829	0.984181
0	0	0	0	0	0	0
0.639702	0.821377	0.793734	0.696591	0.927724	0.790324	0.961624
0.867599	0.788038	0.919378	0.89015	0.952131	0.833009	0.974283
0	0	0	0	0	0	0
0	0	0	0	0	0	0
0.0808854	0.309626	0.168322	0.547215	0.403163	0.413864	0.579125
0.156938	0.464377	0.522241	0.498471	0.539846	0.50481	0.546347
0.172211	0.434337	0.48383	0.553473	0.533097	0.534721	0.629017
0.122765	0.380553	0.657544	0.61385	0.622938	0.564608	0.687597
0.151797	0.388913	0.499625	0.498045	0.54754	0.477373	0.571824
0.0471204	0.476011	0.565387	0.560798	0.610843	0.541087	0.603011
0.188432	0.605111	0.590182	0.733463	0.749077	0.626863	0.73089
0.0436813	0.302469	0.323886	0.412053	0.34366	0.262448	0.380274
0.077658	0.352001	0.434627	0.40919	0.399066	0.40541	0.576566
0.142512	0.396906	0.619354	0.589065	0.617507	0.649989	0.740236
0.171027	0.478003	0.513803	0.603327	0.570002	0.551193	0.599961
0.222628	0.586214	0.780997	0.784076	0.798089	0.713316	0.808034
0.217686	0.439477	0.634553	0.691632	0.566708	0.54372	0.595413
0.179889	0.401994	0.509795	0.641344	0.437893	0.437896	0.586881
0.266115	0.501039	0.571718	0.654775	0.602255	0.563328	0.661577
0.291693	0.558697	0.817732	0.87194	0.74548	0.732806	0.871978
0.255398	0.541365	0.651633	0.778483	0.531186	0.520027	0.740508
0.258248	0.488576	0.690511	0.741451	0.503719	0.56981	0.626635
0.0593587	0.504414	0.516923	0.627374	0.563491	0.610155	0.707942
0.210495	0.450095	0.55241	0.63791	0.532955	0.554444	0.55695
0.119896	0.504337	0.709903	0.68616	0.652372	0.532484	0.59997
0.0640093	0.297589	0.629204	0.756246	0.511716	0.424748	0.580486
0.0590549	0.275166	0.481556	0.618667	0.419224	0.542828	0.581193
0	0.274411	0.468233	0.539696	0.474323	0.396313	0.525293
0.0451686	0.349	0.526338	0.661792	0.545322	0.518297	0.602341
0.202819	0.289272	0.419329	0.529013	0.361698	0.438662	0.485812
0.100554	0.40557	0.484159	0.47649	0.465823	0.387275	0.486078
0.123367	0.406113	0.541852	0.621605	0.568422	0.550551	0.609542
0.147159	0.511016	0.578149	0.700136	0.680551	0.518127	0.673857
0.103377	0.23485	0.450602	0.582964	0.388518	0.326317	0.534555
0.137404	0.204399	0.425014	0.64259	0.421777	0.424215	0.596438
0.272532	0.468992	0.487123	0.681526	0.539278	0.488773	0.537491
0.19221	0.404945	0.486258	0.419883	0.546329	0.431541	0.55647
0.237973	0.232511	0.237329	0.418446	0.238326	0.198874	0.236371
0	0.251915	0.305869	0.672903	0.45863	0.455377	0.483792
0	0.26534	0.429708	0.480767	0.683323	0.651435	0.768858
0.651852	0.344022	0.739363	0.79732	0.823323	0.800151	0.849337
0	0.188111	0.300462	0.44998	0.250996	0.210295	0.203528
0	0	0	0	0	0	0
0	0	0	0	0	0	0
0	0	0	0	0	0	0
0	0	0	0	0	0	0
0	0	0	0	0	0	0
0	0	0	0	0	0	0
0	0	0	0	0	0	0
0	0	0	0	0	0	0
0	0.296247	0	0.344456	0	0	0
0	0	0	0	0	0	0
0	0	0	0	0	0	0
0.46941	0.472115	0.933144	0.921963	0.931914	0.876126	0.902498
0.933285	0.952874	0.950703	0.956901	0.95869	0.911115	0.968629
0.181332	0.188034	0.404241	0.369133	0.182208	0.303644	0.178498
0	0.639402	0.939427	0.879368	0.912959	0.793891	0.914152
0	0.0927636	0.181399	0.303188	0.192051	0.338582	0.401195
0	0.723757	0	0.874379	0.897268	0.715629	0.648502
0	0	0	0	0	0	0
0	0	0	0	0	0	0
0	0	0	0	0	0	0
0.170262	0.171782	0.172002	0.189045	0.165338	0.275702	0.154449
0.126466	0.545251	0.49384	0.604801	0.635096	0.57761	0.654586
0	0.438382	0.61633	0.434179	0.803502	0.791485	0.869329
0.141321	0.318356	0.573451	0.582659	0.39431	0.431906	0.474868
0.0769374	0.290987	0.436633	0.421431	0.511294	0.485471	0.601384
0.109936	0.351377	0.671632	0.664194	0.57967	0.490078	0.432999
0.132928	0.154615	0.294739	0.295718	0.392503	0.348649	0.701616
0.130607	0.284558	0.664509	0.666915	0.532288	0.671729	0.707285
0.0830684	0.361449	0.673683	0.650218	0.513623	0.513657	0.448555
0.149053	0.527488	0.530131	0.729795	0.629495	0.469424	0.531132
0.1687	0.563134	0.609752	0.598772	0.591768	0.637595	0.603423
0.172183	0.333187	0.179333	0.350515	0.355018	0.635581	0.860372
0.299211	0.40768	0.427556	0.397256	0.426561	0.409071	0.43224
0	0	0.234213	0.391504	0.431254	0.399503	0.430827
0	0.362973	0.428803	0.422134	0.796852	0.4144	0.394213
0.173519	0.582531	0.696551	0.669465	0.694559	0.577092	0.684245
0	0.0681904	0.215752	0.149185	0.084254	0.0364725	0.0788337
0.0436978	0.359185	0.52015	0.600172	0.466331	0.50826	0.477087
0.157124	0.473655	0.654287	0.725647	0.500028	0.469436	0.576983
0	0	0.471303	0.439414	0.467708	0.430361	0.472592
0	0	0.899922	0.868866	0.890038	0.782985	0.905816
0	0	0	0	0	0	0.805378
0	0	0.929417	0	0.9145	0.855339	0.919945
0	0	0	0	0	0	0
0	0.151488	0.173785	0.160912	0.173088	0.127956	0.177686
0	0.284085	0.306287	0.381964	0.300331	0.450204	0.523376
0.0761441	0.163093	0.176083	0.297613	0.361349	0.339844	0.448681
0.282664	0.689517	0.734802	0.867708	0.741075	0.702808	0.757564
0.229162	0.498863	0.643259	0.624097	0.6672	0.745825	0.26941
0.193231	0.614032	0.694402	0.731204	0.674855	0.631331	0.692235
0.123554	0.463576	0.552712	0.562077	0.546373	0.504168	0.555117
0.35402	0.605837	0.797857	0.808997	0.657243	0.631561	0.632597
0.441758	0.657478	0.690213	0.684494	0.678417	0.648674	0.827445
0.28547	0.653287	0.715012	0.90757	0.718521	0.701646	0.746793
0.227301	0.388278	0.448372	0.66246	0.65738	0.412014	0.467197
0	0.252248	0.306624	0.548595	0.587548	0.504728	0.561773
0.108579	0.287286	0.483878	0.467591	0.367629	0.458555	0.623963
0	0	0.458202	0.56847	0.305682	0.302306	0.243285
0	0	0.47121	0.452145	0.425177	0.424716	0.466347
0.17976	0.302074	0.686574	0.603502	0.664008	0.637665	0.679778
0.129849	0.375011	0.710382	0.855637	0.546481	0.679304	0.860309
0	0.201809	0.600236	0.692732	0.556011	0.540138	0.612988
0.071482	0.160788	0.485158	0.624762	0.424467	0.491535	0.770233
0.188887	0.361187	0.564948	0.593055	0.504439	0.543843	0.602047
0.0672125	0.228121	0.347219	0.348016	0.431892	0.400467	0.447358
0.103161	0.391091	0.690637	0.827105	0.622516	0.536923	0.693214
0.0963301	0.420966	0.776214	0.705159	0.635964	0.522404	0.733496
0.112957	0.333909	0.666114	0.551936	0.581576	0.680994	0.848371
0.0688457	0.618967	0.839807	0.789142	0.837944	0.745074	0.840455
0.059132	0.53801	0.632611	0.742165	0.676046	0.580823	0.696227
0.113927	0.39132	0.756108	0.670769	0.576208	0.530399	0.585693
0.188474	0.403061	0.72286	0.837249	0.728272	0.68068	0.733251
0.102986	0.731089	0.838606	0.869637	0.856343	0.736471	0.854331
0	0	0	0	0	0	0
0	0	0	0	0.726465	0.668686	0
0.113863	0.236827	0.339936	0.376701	0.361489	0.324485	0.307016
0.114904	0.198026	0.326746	0.527405	0.381288	0.34419	0.332264
0.426758	0.754507	0.900975	0.868875	0.90178	0.868006	0.916587
0.356965	0.413236	0.432965	0.877769	0.924808	0.416045	0.904671
0.243423	0.468567	0.613167	0.479466	0.533453	0.507867	0.552715
0.134062	0.567985	0.671305	0.802337	0.678197	0.430666	0.689832
0	0.433729	0.549158	0.691082	0.69287	0.584817	0.640493
0.626193	0.812901	0.715392	0.843061	0.884377	0.787155	0.94453
0.297835	0.476554	0.474794	0.503577	0.499438	0.503565	0.538769
0	0	0	0	0	0	0
0	0	0	0	0	0	0
0	0	0.487745	0.458016	0.431935	0.427317	0.458668
0	0.197365	0.484531	0.581721	0.391436	0.543665	0.618365
0.132789	0.358964	0.689798	0.78932	0.588868	0.566906	0.690588
0.187732	0.62056	0.742876	0.690588	0.706816	0.689998	0.708915
0.352218	0.440022	0.56416	0.558411	0.741854	0.707179	0.678263
0.05039	0.321492	0.443365	0.53674	0.374612	0.569481	0.461841
0.175133	0.488763	0.733432	0.728602	0.687989	0.742105	0.786002
0.170722	0.633968	0.768709	0.841736	0.746641	0.782098	0.902323
0.0434742	0.468255	0.636947	0.765412	0.508184	0.548669	0.671471
0	0.456315	0.554021	0.615207	0.446817	0.406088	0.523363
0.170051	0.349374	0.678292	0.666707	0.463399	0.54941	0.569115
0	0.335212	0.521026	0.668421	0.343684	0.37243	0.457405
0.0869633	0.357006	0.412213	0.575859	0.407152	0.397775	0.531432
0.0907797	0.235623	0.401162	0.564101	0.38184	0.439369	0.482514
0.306375	0.845107	0.896662	0.931177	0.917275	0.859951	0.887817
0	0	0	0	0.403711	0.255727	0
0	0	0	0	0	0.843628	0
0	0	0	0.412363	0	0	0.406677
0	0	0	0.429752	0.415571	0	0.458892
0	0.377481	0.908503	0.444285	0.449692	0.793673	0.87064
0.677925	0.805678	0.934859	0.945054	0.837567	0.863622	0.956748
0	0	0	0	0	0	0
0	0	0	0	0	0	0
0	0	0	0	0	0	0
0	0	0	0	0	0	0
0.342716	0.860744	0.892482	0.882853	0.867144	0.831486	0.904708
0.307291	0.754386	0.923728	0.898072	0.930919	0.815928	0.949703
0	0.777203	0.925227	0.895987	0.89293	0.886827	0.916515
0	0.607569	0.606535	0.613802	0.614997	0.573045	0.629838
0	0.446188	0	0.382294	0	0	0
0.67804	0.711803	0.568747	0.660855	0.516118	0.499408	0.878378
0	0.286321	0.656181	0.743464	0.417699	0.691506	0.722967
0	0.25912	0.572898	0.580083	0.285123	0.278755	0
0	0.174331	0.215774	0.210519	0.215364	0.18831	0.220688
0	0	0	0	0	0	0
0	0	0.343308	0.379986	0.288841	0.275097	0.345132
0	0	0.184551	0.186655	0.174112	0.148841	0.186671
0.731346	0.821709	0.873647	0.966102	0.938513	0.871286	0.880714
0	0	0.407986	0.406228	0	0.312287	0.435867
0	0	0.489581	0.507548	0.26647	0.416307	0.474376
0.119955	0.348883	0.529659	0.619551	0.550303	0.573849	0.623481
0	0	0.764273	0.323306	0	0	0.314462
0	0.4823	0.871032	0.834364	0.315463	0.528352	0.540599
0	0.256357	0.29912	0.862137	0.560968	0.547301	0.583934
0.094282	0.327226	0.395143	0.560056	0.534595	0.498973	0.513589
0.295232	0.810867	0.898971	0.914214	0.839494	0.880674	0.884999
0.268688	0.420416	0.746513	0.742119	0.61102	0.564486	0.61308
0	0.59134	0.543422	0.770375	0.557035	0.523293	0.553083
0.0993321	0.460111	0.521295	0.627154	0.627155	0.596395	0.638707
0.176914	0.372282	0.373033	0.609267	0.335281	0.299014	0.40617
0.2918	0.563805	0.695141	0.74109	0.765397	0.70166	0.76713
0.220477	0.318237	0.445201	0.500669	0.525317	0.491742	0.461147
0.308663	0.529442	0.562364	0.670911	0.656519	0.598799	0.728193
0.277618	0.373288	0.562299	0.548485	0.465245	0.509776	0.634855
0.237371	0.563396	0.763449	0.877943	0.721732	0.715368	0.76569
0	0.16287	0.335971	0.171448	0.364868	0.264912	0.350945
0.135598	0.350526	0.571987	0.670192	0.422943	0.533135	0.606847
0	0.389167	0.497669	0.635825	0.473136	0.472552	0.487442
0.440059	0.479532	0.481939	0.826137	0.776848	0.434039	0.796334
0.204284	0.37368	0.637183	0.838401	0.646767	0.599269	0.817994
0.194043	0.23007	0.479549	0.759286	0.630768	0.574234	0.623269
0	0	0.111202	0.114983	0.335196	0.288372	0.416818
0.413128	0.271209	0.708088	0.702761	0.582259	0.562226	0.593277
0	0	0.291972	0.288634	0.287263	0.135017	0
0.0616616	0.063281	0.0960428	0.214341	0.0694231	0.0765221	0.143741
0.0659062	0.0679082	0.301668	0.37549	0.34023	0.317253	0.433811
0	0.362595	0.613503	0.673402	0.744444	0.700108	0.739845
0.119263	0.607163	0.517573	0.519345	0.877133	0.863328	0.913236
0	0.439211	0.237445	0.413922	0.65512	0.416427	0.451605
0.240235	0.5786	0.57871	0.6008	0.602745	0.588533	0.633859
0	0	0	0	0	0	0
0	0	0.385675	0.349829	0.345357	0.310601	0.376261
0	0	0.167803	0.248229	0.114739	0.206236	0.459134
0	0.441718	0.377953	0.32164	0.394346	0.319071	0.38021
0	0	0.894972	0.903461	0.939482	0.890038	0.906764
0	0.403226	0.425335	0.385812	0.425528	0.394113	0.451386
0	0.573718	0.744403	0.723404	0.739432	0.740556	0.832042
0.179739	0.291059	0.504666	0.726246	0.333615	0.284476	0.361012
0.102718	0.283034	0.566742	0.398778	0.282371	0.240946	0.397405
0	0.309549	0.353008	0.350482	0.334208	0.422748	0.354284
0.0677173	0.236183	0.270274	0.270397	0.267915	0.298188	0.355313
0.148628	0.56045	0.69317	0.795052	0.703356	0.659374	0.715722
0	0.205671	0.375765	0.359338	0.370965	0.323237	0.373501
0.0683298	0.229866	0.343275	0.580912	0.40299	0.376019	0.40757
0.124993	0.391313	0.498782	0.808891	0.606569	0.654235	0.596462
0	0.253065	0.474267	0.557431	0.292026	0.525222	0.585083
0.0784317	0.348183	0.52679	0.538997	0.467351	0.46787	0.507976
0.146661	0.324631	0.402845	0.539437	0.487656	0.50758	0.4428
0.0751846	0.362835	0.706388	0.824155	0.689557	0.597719	0.715773
0.249331	0.666127	0.894454	0.747099	0.587024	0.705329	0.760506
0	0.362262	0.429119	0.45789	0.390748	0.333747	0.407803
0	0	0	0	0	0	0
0.107004	0.57251	0.470707	0.47962	0.562304	0.608582	0.494502
0.260666	0.373388	0.769935	0.693336	0.552625	0.570681	0.706264
0.238147	0.278962	0.522733	0.471273	0.551849	0.539244	0.304141
0	0	0	0.366667	0	0	0
0	0.320016	0.314259	0.340843	0.369905	0.32348	0.346778
0.129789	0.402158	0.474929	0.54635	0.467424	0.380222	0.467984
0	0.0925926	0.601217	0.708488	0.608984	0.546744	0.722482
0	0.299264	0.64805	0.8159	0.362642	0.570322	0.618393
0.131549	0.742988	0.806316	0.795808	0.675444	0.743992	0.652432
0.277732	0.440014	0.504973	0.584726	0.478809	0.473411	0.516765
0.252228	0.783519	0.897115	0.887411	0.877353	0.887724	0.912742
0	0.285253	0.602511	0.581372	0.584249	0.49025	0.515022
0	0.399343	0.860081	0.787451	0.431396	0.863419	0.871827
0	0.323343	0.379354	0.371789	0.320421	0.403523	0.446669
0.188208	0.20659	0.406147	0.579813	0.433878	0.339323	0.412789
0	0	0	0	0	0	0
0	0.295608	0.176843	0.181391	0.265661	0.153851	0.367773
0.479378	0.417677	0.451636	0.46269	0.466779	0.423485	0.472937
0	0	0	0	0	0	0
0	0	0	0	0	0	0
0	0	0.466891	0.422367	0.431693	0.379386	0.430566
0	0	0.579651	0.567159	0.522619	0.477709	0.566511
0	0	0	0	0	0	0.439651
0.253763	0.709442	0.880036	0.879369	0.853475	0.792559	0.829698
0	0.342525	0.914106	0.858438	0.9307	0.895594	0.940424
0.317541	0.30136	0.894433	0.846413	0.856725	0.879723	0.838194
0.842655	0.885073	0.820629	0.864995	0.925249	0.919017	0.88125
0	0	0	0	0	0	0
0.889569	0.961806	0.956097	0.895168	0.954855	0.915081	0.973451
0.847934	0.851391	0.929422	0.888699	0.907218	0.851783	0.874536
0.870323	0.905408	0.918334	0.905588	0.930243	0.89759	0.95597
0.79146	0.897213	0.949853	0.906066	0.941495	0.914519	0.957616
0.782975	0.943393	0.958625	0.903005	0.891136	0.873171	0.927973
0	0	0	0	0	0	0
0	0	0	0	0	0	0
0	0.426863	0.426189	0.472564	0.461328	0.401283	0.431711
0	0.395088	0.411217	0.835227	0.413466	0.40005	0
0.446833	0.384223	0.426945	0.885738	0.393736	0.408333	0.441477
0.478931	0.87364	0.80471	0.836891	0.956236	0.914171	0.93878
0.639671	0.63753	0.637824	0.640475	0.631774	0.595542	0.644449
0.455967	0.439883	0.895276	0.892657	0.949797	0.893288	0.930826
0	0	0	0	0	0	0
0	0	0	0	0	0	0
0	0	0	0	0	0	0
0	0	0	0	0	0	0
0	0	0	0	0	0	0
0	0	0	0	0	0	0
0	0	0	0	0	0	0
0	0.76087	0.817061	0.773196	0.868599	0.90038	0.91261
0	0	0	0	0	0	0
0	0	0	0.262248	0.303675	0.281655	0.366756
0	0	0	0	0	0	0
0	0	0	0	0	0	0
0	0	0	0	0	0	0
0	0	0	0	0	0	0
0	0	0	0	0	0	0
0	0	0	0	0	0	0
0	0	0	0	0	0	0
0	0	0	0	0	0	0
0.134092	0.285609	0.517755	0.660947	0.611521	0.736874	0.650615
0	0.379789	0.49688	0.440567	0.501504	0.290324	0.325771
0.177806	0.404034	0.437699	0.435641	0.463829	0.389504	0.435313
0.164004	0.447402	0.667858	0.616795	0.751894	0.715551	0.703404
0.193082	0.610296	0.681515	0.655321	0.662826	0.630257	0.676318
0.139189	0.368197	0.392053	0.521154	0.535808	0.516583	0.572228
0.136548	0.4141	0.617363	0.704479	0.764859	0.696578	0.750601
0.135101	0.21364	0.37203	0.596776	0.492291	0.448922	0.492697
0	0.392486	0.455814	0.419964	0.83767	0.854537	0.850019
0	0.31621	0.444185	0.609452	0.571802	0.583577	0.466887
0	0.329412	0.690909	0.430186	0.432461	0.782811	0.475347
0.179324	0.536396	0.522135	0.582381	0.520576	0.437073	0.488752
0.235426	0.307394	0.412503	0.37978	0.360107	0.253204	0.378367
0	0	0	0	0	0	0
0	0.20757	0	0.607539	0.408241	0.626175	0.642629
0.466633	0.869552	0.700705	0.659485	0.716777	0.676649	0.713449
0.190728	0.183451	0.192469	0.191748	0.347274	0.306351	0.359968
0.456977	0.825174	0.701244	0.667352	0.899962	0.85382	0.896037
0.295646	0.711193	0.947795	0.890826	0.916384	0.887581	0.946329
0.591453	0.817818	0.93515	0.92891	0.950358	0.913023	0.966378
0.232537	0.462778	0.701329	0.685184	0.898541	0.830599	0.714718
0.473042	0.580418	0.955532	0.915545	0.878485	0.896124	0.937019
0.381266	0.765384	0.923232	0.901719	0.892139	0.863082	0.929993
0.235648	0.331285	0.61876	0.820566	0.709635	0.697067	0.747308
0	0.168264	0.821023	0.836001	0.861773	0.832817	0.90225
0	0.30336	0.282742	0.583579	0.487426	0.544886	0.522024
0.0519846	0.22366	0.362551	0.487527	0.402003	0.405923	0.489391
0.455122	0.856474	0.912986	0.796147	0.900031	0.840043	0.913021
0.47953	0.492812	0.48156	0.87859	0.475281	0.432052	0.469889
0.489305	0.448588	0.904622	0.897996	0.933048	0.87724	0.891619
0	0.375316	0.416463	0.44491	0.437265	0.426309	0.469144
0.269792	0.433307	0.784619	0.820689	0.448445	0.39783	0.837535
0.344154	0	0.905279	0.881981	0.879976	0.850374	0.924775
0.302788	0.428943	0.850642	0.8676	0.902927	0.897141	0.943165
0.491709	0.596566	0.925618	0.873768	0.891519	0.868325	0.902984
0	0	0	0	0	0	0
0	0	0	0	0	0.851561	0.822342
0.417766	0	0.431801	0.428164	0.908229	0.869456	0.915396
0	0	0	0	0	0	0
0	0	0	0	0	0	0
0	0	0	0.812417	0.652399	0.649628	0.889245
0	0.701342	0.754967	0.790541	0.932919	0.84053	0.876765
0	0.871566	0.960599	0.856308	0.918571	0.927235	0.96288
0	0.74006	0.903485	0.832812	0.854036	0.82745	0.892031
0.64825	0.961663	0.890369	0.892973	0.91131	0.924537	0.954052
0.725087	0.899163	0.913942	0.844155	0.900349	0.842226	0.894196
0.897174	0.927376	0.948152	0.910542	0.93482	0.977336	0.956752
0.848741	0.914088	0.911973	0.896412	0.935467	0.896786	0.94221
0.809023	0.823349	0.98374	0.927794	0.971552	0.920982	0.963947
0	0	0	0	0	0	0
0.958089	0.983534	0.93087	0.953542	0.963085	0.917785	0.958457
0	0	0	0	0	0	0
0	0	0	0.790089	0.889769	0.852961	0.84272
0	0	0.826059	0	0	0.598247	0.641064
0	0	0.819166	0.772714	0	0	0.899181
0	0	0.881623	0.830124	0.915944	0.810182	0.885606
0.561664	0.73182	0.826831	0.773884	0.823355	0.743189	0.949355
0	0.426906	0	0	0	0.378685	0.452603
0.508616	0.495004	0.50987	0.643187	0.522006	0.606493	0.680601
0	0.0884781	0.0941754	0.100177	0.099925	0.0578001	0.101909
0.182807	0.307701	0.332173	0.479849	0.352666	0.32993	0.371906
0.102867	0.274652	0.42982	0.50008	0.443838	0.422113	0.396355
0	0	0	0	0	0	0
0	0	0	0	0	0	0
0	0	0	0	0	0	0
0.919826	0.837003	0.931403	0.883575	0.940826	0.899131	0.942056
0.194753	0.219645	0.426948	0.234269	0.233533	0.347409	0.229965
0	0	0.0976649	0.110365	0	0	0.0928885
0.23835	0.406742	0.453198	0.619482	0.617864	0.626865	0.662323
0	0.0958188	0.228506	0.310401	0.104355	0.0756932	0.217659
0	0.143284	0.323439	0.346625	0.337831	0.145029	0.359477
0	0.135188	0.456645	0.484821	0.452791	0.110744	0.456613
0	0.110795	0.110685	0.54291	0.277775	0.240118	0.377555
0.149545	0.414381	0.485206	0.510023	0.336011	0.315125	0.644559
0	0	0.175583	0.254652	0	0	0
0.117302	0.2227	0.326647	0.363789	0.134075	0.190849	0.364516
0	0.15621	0.311288	0.309852	0.155708	0.115101	0.176944
0	0.226872	0.30028	0.286756	0.267743	0.219765	0.294983
0.0783038	0.165049	0.16238	0.211956	0.160876	0.120616	0.248123
0	0.387488	0.485451	0.693751	0.631672	0.586352	0.630181
0	0.344278	0.391323	0.538461	0.388509	0.340813	0.600043
0.130347	0.347434	0.218897	0.253363	0.406314	0.353394	0.392743
0.207288	0.370302	0.438589	0.603668	0.505736	0.477536	0.536192
0.0716492	0.224292	0.343968	0.518793	0.37062	0.341148	0.408047
0.226771	0.297199	0.310273	0.311258	0.5931	0.60093	0.610899
0	0	0	0.858528	0.919574	0.416381	0.877866
0.731234	0.887558	0.959608	0.960289	0.94886	0.87824	0.926864
0.422479	0.422015	0.434098	0.441308	0.420883	0.374996	0.411441
0	0	0.929547	0.922806	0.871411	0.910848	0.941231
0.167809	0.322965	0.187368	0.527139	0.193724	0.345919	0.691384
0.0807132	0.238853	0.384117	0.392662	0.372917	0.21557	0.257113
0.285617	0.859548	0.897275	0.923082	0.90157	0.869754	0.952561
0.377717	0.634888	0.678768	0.857557	0.617154	0.573347	0.67345
0.589545	0.87784	0.875961	0.87037	0.930919	0.890966	0.937788
0.295583	0	0.557636	0.735018	0.838739	0.885052	0.939715
0.219812	0.425696	0.459483	0.434548	0.445957	0.413111	0.462065
0.418521	0.625471	0.63667	0.639362	0.661271	0.637866	0.684424
0.57353	0.641506	0.701172	0.679749	0.709871	0.895203	0.704043
0.399654	0.372863	0.885241	0.780182	0.422632	0.389496	0.424271
0	0	0.169749	0.317517	0.387893	0.118187	0.169791
0.122675	0.329959	0.391578	0.486905	0.503732	0.476787	0.647216
0.158697	0.38999	0.268459	0.413355	0.37331	0.272624	0.420669
0	0.728411	0	0.876475	0	0.753051	0
0.385547	0.437504	0.235371	0.434956	0.594965	0.385853	0.544887
0.356246	0.282675	0.152998	0.14636	0.345683	0.276216	0
0.623715	0.898732	0.88668	0.921906	0.636334	0.603023	0.635418
0.118595	0.392887	0.425291	0.617235	0.430437	0.400487	0.476805
0.156465	0.409644	0.343789	0.223061	0.558222	0.524068	0.572328
0.0542214	0.210845	0.245725	0.304781	0.165895	0.371306	0.466847
0.0772441	0.205271	0.441558	0.688967	0.693678	0.494346	0.604047
0.167091	0.42302	0.576599	0.83986	0.701829	0.753936	0.783723
0	0.230871	0.423592	0.677711	0.443423	0.354501	0.405656
0.446605	0.693094	0.482581	0.459974	0.663932	0.622051	0.659564
0	0	0	0	0	0	0
0	0	0	0	0	0	0
0	0	0.388433	0.812881	0.33045	0.283554	0.337311
0	0	0	0	0	0	0
0	0	0	0	0	0	0
0.478351	0.473677	0.478345	0.451064	0.487206	0.869555	0.486366
0	0.126847	0.195188	0.299637	0.266372	0.242533	0.313455
0.076068	0.244593	0.252927	0.374425	0.359982	0.392839	0.384152
0	0	0.85299	0.816915	0.918956	0.864622	0.935405
0.144615	0.158562	0.159681	0.409587	0.158908	0.120785	0.386228
0	0.257437	0.316117	0.47288	0.568933	0.544456	0.609491
0	0	0.8625	0.795181	0.935927	0.755972	0.849342
0	0	0.830524	0.819468	0.641467	0.752777	0.827685
0	0.618857	0	0.461538	0.44518	0.382451	0.851792
0	0.154571	0.334121	0.423954	0.378964	0.288709	0.40262
0	0.213689	0.466538	0.482339	0.48487	0.327561	0.483813
0.205162	0.612736	0.653347	0.621155	0.637858	0.602663	0.579665
0.187387	0.453652	0.598731	0.652189	0.454213	0.538132	0.476329
0.10019	0.33262	0.388117	0.615931	0.512195	0.562136	0.529801
0.133491	0.453983	0.472571	0.459991	0.477683	0.338399	0.495945
0.0821425	0.278561	0.39776	0.379906	0.398195	0.37018	0.405903
0	0.335477	0.486079	0.370314	0.475844	0.658305	0.698461
0	0.213725	0.134643	0.353177	0.349888	0.289025	0.376657
0	0.140967	0.270139	0.361749	0.41006	0.313765	0.341511
0	0.0917255	0	0.078125	0.103353	0.184932	0.220451
0	0.185716	0.247389	0.410205	0.268282	0.299659	0.424838
0	0.158776	0	0.127297	0.109896	0.167477	0.0969337
0.277068	0.572216	0.447473	0.663277	0.691602	0.642855	0.722682
0.484893	0.486339	0.486997	0.478213	0	0	0
0.187583	0.517312	0.672136	0.672054	0.711304	0.688084	0.736291
0	0.839296	0.963636	0.963624	0.89511	0.921635	0.965187
0.0991283	0.351482	0.46301	0.614819	0.416545	0.462648	0.472877
0.417859	0.527511	0.876634	0.881878	0.889347	0.807043	0.883085
0	0.789415	0.872141	0.79879	0.775833	0.752241	0.76515
0.272727	0.416854	0.821211	0.859286	0.390324	0.368879	0.727683
0.121321	0.137954	0.458489	0.546769	0.381561	0.488499	0.457676
0	0.282275	0.151626	0.238109	0.259096	0.197226	0.30174
0.284205	0.571211	0.869408	0.866773	0.910335	0.833858	0.898038
0.138992	0.258752	0.356567	0.21572	0.357141	0.402751	0.499592
0.233415	0.690743	0.642498	0.66101	0.662313	0.682865	0.735054
0.636404	0.878589	0.929437	0.91355	0.952886	0.911327	0.955243
0.365888	0.280211	0.731326	0.779671	0.84904	0.694936	0.913139
0	0	0	0	0	0	0
0	0	0	0	0	0	0
0	0	0	0	0.844398	0.827313	0.846741
0	0	0	0.613139	0	0	0
0.322122	0.394837	0.389913	0.395894	0.407379	0.375488	0.434236
0	0.430435	0.4359	0.437811	0.406604	0.379895	0.442673
0	0	0	0	0	0	0
0	0	0	0	0	0	0
0	0	0	0	0	0	0
0	0	0	0	0	0	0
0	0	0.858304	0.868608	0.867995	0.858703	0.936448
0	0.355263	0.815535	0.834819	0.851453	0.794393	0.839204
0	0.672769	0.936784	0.821875	0.870922	0.860797	0.922705
0.17701	0.591339	0.851803	0.845285	0.840172	0.855491	0.876804
0	0.406533	0.430278	0.385703	0.402667	0.588467	0.649719
0	0.121367	0	0.170492	0.119806	0.255952	0.279287
0.262569	0.274101	0.30243	0.314858	0.874721	0.531189	0.608497
0.431254	0.425581	0.471468	0.447319	0.48314	0.439634	0.475291
0.0588288	0.0620332	0.0984052	0.101136	0.203136	0.0407336	0.0360783
0	0.284116	0.322607	0.351562	0.261234	0.321205	0.390322
0.074634	0.23577	0.345121	0.395875	0.432253	0.354392	0.486216
0.236172	0.361844	0.429623	0.474479	0.438758	0.493137	0.590869
0.108304	0.268555	0.410342	0.344096	0.300988	0.373606	0.419138
0.0418831	0.32599	0.288275	0.418768	0.478662	0.430947	0.528033
0	0.263832	0.287025	0.345039	0.31709	0.305388	0.424053
0.207852	0.459126	0.590304	0.673083	0.717556	0.745157	0.666942
0.202085	0.499234	0.616908	0.633113	0.597271	0.662877	0.749993
0.18395	0.245824	0.401035	0.37299	0.44852	0.363627	0.481398
0.0422391	0.275189	0.337403	0.478644	0.349613	0.355797	0.369843
0.0548077	0.320354	0.356863	0.534151	0.459234	0.536899	0.595374
0.126907	0.267164	0.420226	0.377965	0.379341	0.393438	0.377961
0.10211	0.216406	0.374728	0.505252	0.383515	0.489324	0.477006
0.0597745	0.208842	0.310313	0.404016	0.361386	0.337225	0.481694
0	0.146496	0.32037	0.423604	0.351122	0.369146	0.469677
0.14251	0.289499	0.478444	0.491673	0.257247	0.304378	0.350076
0.0563718	0.17823	0.202957	0.337833	0.266599	0.340118	0.351532
0	0.434468	0.595829	0.681886	0.654774	0.660838	0.720578
0.122034	0.626336	0.722433	0.827897	0.832765	0.83684	0.891257
0.168102	0.461754	0.461138	0.491296	0.530233	0.63447	0.880476
0.454939	0.789324	0.877237	0.920683	0.921807	0.910586	0.819945
0.442934	0.464563	0.532143	0.638766	0.638815	0.606756	0.645529
0.457186	0.414466	0.442484	0.426339	0.448892	0.377266	0.432617
0	0.729456	0.938954	0.866782	0.897431	0.802412	0.915707
0.593723	0.726815	0.757446	0.66402	0.939647	0.889677	0.927232
0	0	0	0	0	0	0
0	0	0	0	0	0	0
0	0	0	0	0	0	0
0	0	0	0	0	0	0
0.874144	0.899934	0.944882	0.89596	0.973562	0.937105	0.980689
0	0	0	0	0	0	0
0	0	0	0	0	0	0
0	0	0	0	0	0	0
0	0	0	0	0	0	0
0	0	0	0	0	0	0
0	0	0	0	0	0	0
0	0	0	0	0	0	0
0	0	0	0	0	0	0
0.0980068	0.262396	0.35264	0.431356	0.494065	0.432802	0.375874
0	0	0.254417	0.272663	0.268187	0	0.258544
0.224178	0.482341	0.423944	0.463611	0.47497	0.489572	0.482538
0	0.662722	0	0	0	0.60613	0
0	0	0	0	0	0	0
0	0.711636	0.812903	0.753204	0.927662	0.886075	0.967342
0.426985	0.445682	0.460958	0.454473	0.235893	0.199393	0.242814
0.120605	0.223037	0.336651	0.209609	0.382066	0.346607	0.387109
0.147954	0.334665	0.363847	0.501518	0.505853	0.46257	0.296826
0.422361	0.685411	0.87933	0.862651	0.7356	0.669468	0.714987
0.268156	0.291671	0.289529	0.313525	0.292169	0.273238	0.298559
0	0	0	0	0	0	0
0	0	0	0.0603715	0.0665748	0.0317801	0.182376
0	0	0	0.325521	0.408433	0	0
0	0	0	0	0	0	0
0	0	0	0	0	0	0.266141
0	0	0	0.26601	0.255895	0	0.599792
0	0	0	0	0	0	0
0	0	0	0	0	0	0
0	0	0	0	0	0	0
0	0	0	0.782756	0	0	0
0	0	0	0	0	0	0
0	0	0	0	0	0	0
0	0	0	0	0	0	0
0	0	0	0	0	0	0
0	0	0	0	0	0	0
0	0	0	0	0	0	0
0	0	0	0	0	0	0
0.882634	0.936728	0.926959	0.85295	0.947435	0.897749	0.942739
0	0	0	0	0	0	0
0	0.272873	0.427443	0.404762	0.402202	0.344065	0.379503
0	0.0941851	0.366088	0.344482	0.373697	0.411737	0.466183
0	0.275206	0.383893	0.433786	0.184426	0.24153	0.417625
0.094586	0.265862	0.39096	0.564969	0.415145	0.290725	0.422042
0.128154	0.368367	0.395128	0.667482	0.533511	0.50953	0.537059
0.0952991	0.22389	0.480179	0.522987	0.340399	0.449573	0.464868
0.247797	0.426357	0.51679	0.641105	0.548799	0.539694	0.572075
0.0644777	0.129487	0.236828	0.49819	0.195771	0.198013	0.323843
0.120684	0.267941	0.421029	0.546374	0.431555	0.345868	0.468766
0	0.132455	0.295523	0.420222	0.149956	0.266322	0.297062
0	0	0.262004	0.491139	0.115732	0.069927	0.114729
0	0.222585	0.313636	0.64893	0.318185	0.149313	0.317486
0	0.882655	0.968156	0.924131	0.920293	0.796407	0.973985
0	0.0899192	0.304511	0.413722	0.285382	0.312655	0.365835
0	0.0794683	0.280797	0.441217	0.400568	0.547048	0.426683
0	0.159016	0.199311	0.455947	0.376444	0.34761	0.417992
0.077957	0.409055	0.652921	0.633416	0.645257	0.530395	0.658358
0.0577778	0.27734	0.445022	0.427337	0.403178	0.442527	0.517962
0.119594	0.221768	0.39078	0.624162	0.457369	0.484306	0.613538
0.0776546	0.163721	0.167253	0.33246	0.382984	0.316271	0.444274
0	0.389277	0.47219	0.547168	0.457868	0.412829	0.461199
0	0.229245	0.594994	0.607283	0.609931	0.556998	0.430198
0.105922	0.301846	0.506758	0.651131	0.604279	0.573242	0.632607
0.155855	0.420804	0.475132	0.472444	0.469358	0.42618	0.471353
0.483789	0.836139	0.900505	0.90007	0.889463	0.699779	0.865488
0.845004	0.883077	0.913361	0.925178	0.687729	0.909839	0.957979
0.339474	0.550437	0.187603	0.364096	0.584475	0.523689	0.567873
0.906718	0.965815	0.97791	0.966139	0.973956	0.928909	0.972657
0	0	0	0	0	0	0
0.766449	0.86768	0.962851	0.967764	0.963185	0.917578	0.972136
0.437303	0.445268	0.455422	0.475049	0.478981	0.439617	0.479041
0.176382	0.186938	0.184591	0.361985	0.189409	0.339019	0.190425
0.921476	0.956748	0.965497	0.948552	0.976377	0.925741	0.975055
0.469352	0.457351	0.905392	0.896107	0.486155	0.840134	0.493328
0	0	0	0	0	0	0
0	0.058066	0.183489	0.294825	0.30587	0.147306	0.228258
0	0.258602	0.327239	0.413275	0.507129	0.480557	0.667454
0.201888	0.392716	0.701507	0.597072	0.678498	0.648551	0.683397
0.276466	0.476779	0.525709	0.567355	0.519248	0.423081	0.568221
0.361274	0.354126	0.541679	0.503167	0.497798	0.335936	0.379294
0.853486	0.91665	0.968816	0.95275	0.97721	0.950896	0.977025
0	0	0	0	0	0	0
0	0	0	0	0	0	0
0	0	0	0	0.82341	0.606449	0.749341
0	0	0	0	0	0	0
0	0	0	0	0	0	0
0	0	0	0.625316	0	0	0
0	0.0518357	0.14431	0.258842	0	0.0985082	0.155903
0.143878	0.375264	0.198527	0.202064	0.326125	0.148745	0.201504
0.373633	0.427335	0.462465	0.809733	0.465199	0.659375	0.466108
0.184434	0.333352	0.371194	0.591104	0.266022	0.302947	0.372879
0.259602	0.269513	0.519359	0.612136	0.627764	0.590318	0.543929
0.100967	0.178436	0.376881	0.374238	0.259143	0.309345	0.384938
0.29591	0.377812	0.610085	0.759393	0.567349	0.612582	0.736378
0.211926	0.502747	0.439729	0.551623	0.49499	0.378711	0.497787
0.305174	0.566875	0.729496	0.509744	0.627108	0.504317	0.745138
0.216459	0.402698	0.449496	0.451102	0.455309	0.528997	0.523887
0.15927	0.429474	0.674257	0.603941	0.672279	0.64846	0.679752
0.213426	0.441812	0.628098	0.703842	0.700722	0.693432	0.73965
0.252959	0.45183	0.619623	0.514034	0.637889	0.514034	0.544088
0.204553	0.347002	0.45392	0.636505	0.534186	0.427146	0.543252
0.132931	0.258666	0.379409	0.545003	0.393782	0.439826	0.470986
0.0925255	0.165309	0.187799	0.339821	0.325887	0.242606	0.284987
0	0.222098	0.167015	0.331616	0.400294	0.239209	0.363682
0	0.264167	0.283142	0.378551	0.308849	0.273139	0.309709
0.119047	0.61123	0.731334	0.724496	0.706902	0.677163	0.705638
0.16871	0.412993	0.474225	0.476528	0.409019	0.372868	0.483366
0.0728338	0.300844	0.393315	0.435954	0.319452	0.374808	0.403534
0.0670063	0.314328	0.491714	0.406085	0.49539	0.403672	0.515469
0.0971617	0.253854	0.553528	0.664084	0.558363	0.427423	0.599332
0.0587733	0.15139	0.288584	0.368293	0.376951	0.320087	0.303304
0	0.184663	0.636794	0.54744	0.592719	0.599146	0.630565
0.0596224	0.391922	0.522127	0.560951	0.533017	0.589289	0.638719
0.36982	0.551614	0.688374	0.678923	0.67623	0.664675	0.701982
0.292596	0.347872	0.642459	0.685414	0.651174	0.633171	0.69615
0.523981	0.607425	0.637861	0.648969	0.634687	0.581147	0.637364
0	0.212594	0.266839	0.249464	0.240785	0.229411	0.235443
0	0	0	0	0	0	0
0.181687	0.427202	0.442189	0.609899	0.585998	0.41085	0.446422
0.731964	0.843945	0.909009	0.860829	0.868739	0.870936	0.941827
0	0.242981	0.48205	0.485507	0.272585	0.249867	0.303638
0.613774	0.617273	0.847745	0.80363	0.938499	0.915059	0.942565
0	0.755457	0.912371	0.875644	0.927579	0.856852	0.897549
0.843475	0.89883	0.873085	0.930546	0.939836	0.898421	0.928304
0	0.715658	0	0.872321	0.690218	0.572424	0.600317
0	0	0	0	0	0	0
0	0	0	0	0	0	0
0	0	0	0	0	0	0
0	0	0	0	0	0	0
0.860687	0.896639	0.960031	0.929289	0.956181	0.812222	0.967854
0.646666	0.803738	0.906062	0.884095	0.859611	0.817887	0.855241
0	0.917728	0.795461	0.880622	0.913754	0.791112	0.87725
0	0	0	0	0	0	0
0	0	0	0.439477	0.442826	0.409462	0.431192
0	0	0	0	0	0	0
0	0	0	0	0	0	0
0	0	0	0	0	0	0
0	0	0	0	0	0	0
0	0	0.912343	0.846136	0	0	0
0	0.410354	0.898888	0.86031	0.786707	0.81392	0.908779
0	0	0.861796	0.91401	0.78736	0.881523	0.924447
0	0	0	0	0	0	0
0	0	0	0	0	0	0
0	0	0	0	0	0	0
0	0	0	0	0	0	0
0	0	0	0.724983	0	0.762552	0.952883
0	0	0	0	0	0	0
0	0	0	0	0	0	0
0	0	0	0	0	0	0
0	0	0	0	0	0	0
0	0	0	0	0	0	0
0	0	0	0	0	0	0
0	0	0	0	0	0	0
0.85646	0.946591	0.945661	0.946689	0.955682	0.922259	0.964848
0.84471	0.91423	0.941907	0.951548	0.965957	0.925645	0.976919
0.922007	0.940965	0.966016	0.921813	0.962453	0.922125	0.975589
0.426891	0.468409	0.470531	0.478056	0.47491	0.439407	0.820633
0.208743	0.456726	0.666642	0.681634	0.464905	0.65149	0.902939
0.414843	0.448595	0.824185	0.873609	0.93152	0.906306	0.948096
0.157278	0.269905	0.423014	0.598872	0.539621	0.396011	0.551677
0.618479	0.643995	0.707716	0.474887	0.895567	0.857949	0.889009
0.43762	0.388235	0.900255	0.920375	0.439766	0.820925	0.862983
0	0	0	0.171377	0	0.159223	0.218116
0	0.14002	0.247457	0.212991	0.135802	0.226915	0.13445
0.244751	0.272388	0.453437	0.545892	0.308096	0.274563	0.504646
0.0934051	0.0871999	0.264183	0.335642	0.1485	0.0498251	0.16446
0.301305	0.466937	0.80741	0.818849	0.577868	0.5652	0.603529
0	0.215036	0.218062	0.441583	0.213681	0.170541	0.333252
0	0.463611	0.884768	0.897524	0.485015	0.441738	0.806323
0.105521	0.116208	0.111839	0.210548	0.114651	0.148386	0.195012
0	0.236865	0.65252	0.845014	0.608798	0.367365	0.846936
0	0.482763	0.55725	0.555719	0.423244	0.419348	0.59036
0	0	0.849782	0.853786	0.411684	0.392134	0.399422
0	0.701785	0.88992	0.66316	0.806678	0.826474	0.865982
0.839908	0.599568	0.907423	0.816979	0.933646	0.802003	0.951592
0.184707	0.188214	0.621067	0.607702	0.408113	0.151027	0.402367
0.841958	0.896635	0.931471	0.903084	0.932436	0.908727	0.95631
0.13022	0.287388	0.250606	0.237556	0.241404	0.328149	0.252825
0	0.382206	0.315131	0.697302	0.240123	0.241463	0.523401
0.0842202	0.15139	0.615635	0.675547	0.440135	0.446022	0.555961
0.0629432	0.273627	0.632005	0.706643	0.474957	0.522732	0.565143
0	0.179076	0.43404	0.438461	0.175713	0.209019	0.315797
0	0.137107	0.560405	0.559038	0.346051	0.384564	0.502786
0	0.117565	0.502772	0.642211	0.362376	0.337486	0.431026
0	0.171115	0.189286	0.303185	0.103007	0.266665	0.462606
0.104593	0.16857	0.290519	0.465315	0.273529	0.264751	0.34477
0.47011	0.672118	0.80376	0.817598	0.550726	0.332289	0.372325
0.389371	0.42498	0.692889	0.784781	0.672569	0.797437	0.689889
0.426051	0.448193	0.462879	0.460381	0.476114	0.428946	0.476278
0.434356	0.837099	0.893971	0.847067	0.925048	0.891476	0.927261
0	0	0	0	0	0.872478	0.957938
0	0.851049	0.828571	0.915067	0.777615	0.754822	0.808972
0	0.122718	0	0.468603	0	0	0.158805
0.0752939	0.254304	0.446387	0.530727	0.264831	0.346627	0.358029
0.130399	0.167447	0.464533	0.601969	0.59212	0.600377	0.48051
0.284677	0.575839	0.319099	0.62353	0.313943	0.585094	0.631131
0	0	0	0	0	0	0
0	0	0	0	0	0	0
0	0.367067	0.482065	0.449753	0.427893	0.424866	0.454836
0.399719	0.439495	0.480454	0.441071	0.456573	0.423935	0.46956
0.58884	0.594547	0.60097	0.596472	0.6197	0.591348	0.639431
0.442786	0.464015	0.488717	0.480811	0.868198	0.840243	0.929918
0.948333	0.979545	0.947739	0.959803	0.950099	0.91298	0.948711
0.169965	0.194966	0.473264	0.468871	0.475478	0.15135	0.175633
0	0	0	0.327661	0	0	0
0	0	0	0	0	0	0
0	0	0	0.0860514	0	0	0
0	0	0	0.239095	0	0.202646	0.239833
0	0	0	0	0	0	0
0	0	0.27746	0.283992	0.266582	0.236211	0.266516
0	0.45247	0.544785	0.808317	0.304111	0.272727	0.311626
0	0	0.267813	0.759461	0.243473	0.465198	0.710715
0	0	0	0.188262	0.130221	0.0953202	0.134998
0	0	0	0.143624	0.106822	0.371345	0.406642
0	0	0.414526	0.407883	0.25833	0	0
0	0	0.225736	0.397499	0.242444	0.355475	0.265028
0	0	0.746411	0.788121	0.780049	0.713842	0.804456
0	0	0.772748	0.723238	0	0.741447	0.732792
0	0	0.678174	0.681806	0.68632	0.77967	0.908292
0	0	0.350158	0.371758	0	0	0.403752
0	0	0.275065	0.325819	0	0.310051	0.333839
0	0	0	0	0	0.364314	0.410903
0.355856	0.321543	0.681548	0.514089	0.312452	0.447348	0.48903
0	0	0	0	0	0	0
0.430785	0.454329	0.902512	0.879212	0.476635	0.84202	0.892526
0	0	0.229016	0.579928	0	0.254318	0.53371
0.191556	0.183501	0.379587	0.338762	0.179266	0.307886	0.37334
0	0.286288	0.350366	0.430505	0.462457	0.296451	0.559805
0	0.087772	0.197134	0.459047	0.24474	0.207268	0.358135
0.642884	0.639454	0.697535	0.637247	0.894743	0.860208	0.894639
0.592475	0.572806	0.587893	0.88041	0.932424	0.896266	0.903542
0.191887	0.208936	0.453659	0.661315	0.605126	0.425995	0.479581
0.568298	0.811672	0.808077	0.921118	0.911284	0.531874	0.891208
0.822057	0.890605	0.901926	0.885122	0.874027	0.847402	0.886387
0.425276	0.544883	0.594158	0.587729	0.601087	0.579253	0.596412
0.936949	0.945479	0.943781	0.888994	0.960906	0.914939	0.947473
0.95387	0.943131	0.970214	0.965162	0.960909	0.830521	0.965894
0.891104	0.871385	0.933626	0.94239	0.940047	0.882661	0.935347
0.589097	0.608976	0.582985	0.614853	0.923603	0.278979	0.594505
0.436099	0.483032	0.473396	0.464717	0.459579	0.425488	0.468592
0	0	0	0	0	0	0
0	0	0	0	0	0	0
0	0	0.684986	0.664111	0.733802	0.602865	0.529776
0	0	0	0	0	0	0
0	0	0	0	0	0	0
0	0	0	0	0	0	0
0	0	0	0	0	0	0
0	0.278119	0	0	0	0	0
0.874498	0.930477	0.89256	0.884215	0.932963	0.89902	0.944372
0	0.159131	0.451283	0.489142	0.164971	0	0
0.218009	0.35356	0.661822	0.641745	0.595123	0.605291	0.649392
0.903982	0.939818	0.895355	0.918777	0.929218	0.885422	0.946487
0.135006	0.393547	0.650351	0.68305	0.653076	0.62164	0.7063
0	0.42114	0.550998	0.513666	0.313178	0.241596	0.293874
0	0.603321	0.383741	0.931012	0.44795	0.409472	0.482042
0	0.270706	0.466233	0.40598	0.42363	0.386058	0.448273
0	0	0	0	0	0	0
0	0	0	0	0	0	0
0	0	0.254914	0.221814	0.208153	0.239362	0.274489
0	0	0	0	0	0	0
0	0	0	0	0	0	0
0	0	0.737105	0.764033	0	0.736294	0.836384
0.225628	0.412524	0.592829	0.578642	0.452853	0.427496	0.586752
0.0872216	0.180717	0.324081	0.576493	0.231639	0.191523	0.239128
0	0	0	0.339806	0.410731	0.356873	0.423574
0.109084	0.177259	0.215574	0.476767	0.238557	0.286015	0.334928
0	0	0	0.166285	0	0	0
0	0.37464	0.442029	0.455032	0.44075	0.439478	0.462595
0	0	0	0	0	0	0
0.884762	0.917139	0.949881	0.945937	0.965943	0.937397	0
0	0	0.850673	0.77061	0	0	0
0	0.352762	0.461078	0.479672	0	0.741922	0.85246
0	0.455818	0.808251	0.939703	0.437284	0.864444	0.875439
0	0.69585	0.929922	0.839975	0.860582	0.868765	0.892164
0.25719	0.317446	0.596244	0.590975	0.313542	0.573116	0.638406
0.450704	0.461238	0.458901	0.409889	0.874474	0.417794	0.468074
0	0	0	0.42841	0.391604	0.34321	0.415328
0	0	0	0	0	0	0.601618
0	0	0	0	0	0	0
0	0	0	0.828245	0.357723	0.348532	0.3877
0.0904563	0.26856	0.287175	0.284276	0.343256	0.337393	0.2924
0	0.0844468	0.345196	0.356552	0.115069	0.196705	0.136101
0.494399	0.683902	0.884342	0.558373	0.709184	0.342892	0.684271
0.438091	0.591904	0.220955	0.223039	0.483113	0.434567	0.440288
0	0.220507	0.455348	0.505516	0.26239	0.223615	0.272758
0	0.184973	0.388744	0.426617	0.232554	0.195125	0.445299
0.106566	0.394903	0.674021	0.815863	0.608208	0.330982	0.603836
0	0.33633	0.410295	0.678066	0.432741	0.264949	0.430815
0	0.252078	0.277559	0.358564	0.275126	0.23293	0.273404
0	0	0	0	0	0	0
0.0908609	0.331249	0.366712	0.551641	0.362683	0.249153	0.366264
0	0.404152	0	0.421905	0.862041	0.396315	0.439691
0	0	0	0	0	0	0
0.16654	0.253484	0.561552	0.454625	0.725406	0.605947	0.477704
0.368104	0.567544	0.686041	0.685258	0.675312	0.647193	0.703127
0.505534	0.614247	0.919915	0.849373	0.606112	0.832578	0.803738
0.426884	0.636679	0.474405	0.693354	0.469366	0.610706	0.645271
0.383328	0.458729	0.450518	0.748571	0.749179	0.73981	0.446063
0.551765	0.290608	0.580308	0.613546	0.5908	0.276054	0.586267
0.316644	0.409738	0.696447	0.592897	0.35633	0.318698	0.241499
0.271802	0	0.60428	0.599816	0.592333	0.831504	0.872002
0.337316	0.349961	0.554714	0.836133	0.536836	0.662498	0.883738
0.367075	0.460933	0.383473	0.495911	0.656546	0.446861	0.530657
0.076628	0.320347	0.2979	0.458759	0.306268	0.311173	0.372394
0	0.177228	0.338024	0.312882	0.439669	0.407069	0.483361
0.419505	0.469021	0.455828	0.464777	0.463129	0.419664	0.456082
0	0	0	0	0	0	0
0	0.189352	0.201937	0.359951	0.182205	0.228681	0.391879
0.114172	0.174628	0.33804	0.326997	0.28916	0.307807	0.358691
0	0.272761	0.452607	0.562534	0.446933	0.602205	0.527841
0.123439	0.371779	0.380067	0.439057	0.387218	0.403574	0.497665
0.0659422	0.323771	0.430577	0.458025	0.39429	0.441117	0.504117
0.156952	0.429977	0.472634	0.638188	0.477524	0.549706	0.665691
0.139597	0.40679	0.456762	0.671299	0.456237	0.545779	0.535575
0.183613	0.380224	0.47451	0.482082	0.467237	0.59749	0.637111
0	0.212284	0.220476	0.287216	0.217471	0.509863	0.631447
0	0.341223	0.384044	0.513542	0.4742	0.611215	0.490016
0	0.175744	0.180107	0.251319	0.232084	0.265468	0.321682
0	0.215139	0.400957	0.500434	0.22463	0.270536	0.224289
0	0.232367	0.370234	0.444817	0.323306	0.381408	0.359391
0	0.287195	0.308565	0.410761	0.315444	0.392242	0.308171
0	0.37262	0.525563	0.708905	0.726202	0.729694	0.761243
0.111029	0.603284	0.643095	0.676406	0.562421	0.624765	0.673591
0.245448	0.425524	0.779439	0.688702	0.628636	0.595952	0.637877
0.141503	0.471845	0.542873	0.654593	0.544889	0.679863	0.561034
0.137108	0.147364	0.288689	0.432827	0.286657	0.244735	0.300131
0	0.155429	0.560371	0.441867	0.153275	0.115979	0.637504
0.440642	0.476323	0.484772	0.831273	0.491089	0.752317	0.868873
0.584078	0.908447	0.6346	0.797446	0.868	0.882416	0.920287
0	0.722985	0.94902	0.956412	0.949795	0.88964	0.926472
0.238558	0.623657	0.602277	0.562065	0.627753	0.559431	0.608895
0.601308	0.626372	0.867601	0.877363	0.61305	0.877732	0.624837
0.143844	0.270237	0.447009	0.449674	0.31575	0.274719	0.315845
0	0.37266	0.819351	0.840118	0.406716	0.565802	0.643394
0	0.434438	0.850821	0.665501	0.516986	0.501716	0.673235
0	0	0.85246	0.779612	0.790322	0.828493	0.867706
0	0.360155	0.86888	0.80687	0.863391	0.837865	0.694363
0	0.358173	0.239679	0.602634	0.224444	0.392646	0.376035
0	0.220969	0.242168	0.250761	0.281051	0.382384	0.275009
0	0.14261	0.407036	0.436111	0.404759	0.413593	0.430734
0	0.722856	0.835544	0.758857	0.579787	0.783682	0.898089
0.19777	0.429867	0.670751	0.665009	0.474748	0.647523	0.917368
0.148026	0.294966	0.360967	0.174734	0.480549	0.497572	0.378172
0	0.177626	0.316512	0.490575	0.303999	0.292362	0.351045
0	0	0	0	0	0	0
0	0	0	0	0	0	0
0	0	0	0	0	0	0
0.602608	0.511853	0.859972	0.812369	0.826594	0.738943	0.855269
0	0	0.920667	0.854627	0.926145	0.757832	0.933029
0.452796	0.751413	0.79168	0.756929	0.886266	0.844253	0.863349
0.208925	0.566549	0.795562	0.808245	0.849985	0.698366	0.755388
0.472029	0.851267	0.936794	0.933036	0.94547	0.889567	0.936118
0.364976	0.680079	0.755358	0.756908	0.734117	0.710882	0.760432
0.280343	0.717741	0.760395	0.727909	0.752357	0.701149	0.74947
0.495157	0.864788	0.937605	0.889337	0.919637	0.780975	0.915807
0.360842	0.891297	0.930454	0.893759	0.923105	0.873519	0.909761
0.35699	0.871099	0.939887	0.902205	0.947026	0.900959	0.934318
0.289171	0.680072	0.504297	0.701391	0.738942	0.70487	0.748018
0.160592	0.178533	0.173494	0.428398	0.310193	0.278271	0.337985
0	0.223725	0	0	0.229404	0.182248	0.225301
0.767165	0	0.972238	0	0.947753	0.849727	0.918979
0	0.297762	0	0.221063	0.628992	0.503522	0.611351
0.39699	0.34041	0.397506	0.395413	0.823575	0.771024	0.700402
0	0	0	0	0	0	0
0.302399	0.778275	0.474592	0.872466	0.90516	0.859414	0.881285
0	0	0	0	0	0	0
0	0	0	0	0	0	0
0	0	0	0	0	0	0
0	0	0	0	0	0	0
0	0	0	0	0	0	0
0	0.844749	0.967568	0.878032	0.958209	0.931257	0.970956
0.696281	0.876842	0.937128	0.946442	0.932163	0.90169	0.926549
0	0	0	0	0	0	0
0	0	0	0	0	0	0
0	0	0	0	0	0	0
0	0	0	0	0	0	0
0	0	0.332279	0.376843	0.444791	0.415803	0.805411
0.789327	0.898497	0.911291	0.863801	0.922528	0.867145	0.928822
0.876367	0.893623	0.967033	0.919439	0.953416	0.89791	0.941481
0.833922	0.95637	0.93668	0.949782	0.949754	0.9179	0.982959
0	0	0	0	0	0	0
0	0	0	0	0	0	0
0.885257	0.954779	0.943837	0.934487	0.934178	0.925047	0.956851
0.840147	0.897783	0.94799	0.911496	0.971526	0.815061	0.972324
0.877305	0.916134	0.957276	0.957237	0.943115	0.922133	0.969802
0.93798	0.940322	0.973289	0	0.932024	0.925565	0.948263
0	0	0	0	0	0	0
0.444479	0	0.423881	0.48001	0.48736	0.443752	0.488385
0	0	0.540795	0.860333	0.926551	0.853813	0.882417
0.441803	0.466071	0.461786	0.450546	0.468455	0.434977	0.48156
0	0	0	0	0	0	0
0	0	0	0	0	0	0
0	0.431489	0.835814	0.878047	0.742599	0.766343	0.945702
0.744715	0.82978	0.956906	0.896552	0.952436	0.84505	0.933588
0.354129	0.499624	0.549663	0.559006	0.612784	0.728107	0.747505
0	0	0	0	0	0	0
0	0	0	0	0	0	0
0	0	0	0	0	0	0
0	0	0	0	0	0	0
0	0	0	0.453156	0.479686	0.342749	0.439736
0.284438	0.913493	0.905533	0.867902	0.90866	0.884581	0.941596
0.194557	0.418629	0.239563	0.646301	0.23089	0.434667	0.708386
0.910364	0.905611	0.820053	0.874209	0.913401	0.830625	0.884014
0	0.360145	0.321136	0.422358	0.423963	0.875883	0.396248
0.533107	0.602136	0.919696	0.955102	0.844869	0.853941	0.972301
0	0.673818	0.949425	0.949379	0.808678	0.765438	0.881711
0	0.55417	0.597698	0.895913	0.5501	0.835255	0.567343
0.197712	0.534587	0.817615	0.861169	0.857825	0.867628	0.890323
0.272865	0.806031	0.881008	0.863088	0.818991	0.85685	0.868857
0	0.601766	0.921911	0.835408	0.758552	0.843361	0.933616
0	0	0.4663	0.811396	0.841695	0.397726	0.879583
0	0	0.347811	0.528903	0.160404	0.469859	0.517817
0	0.481505	0.852807	0.828769	0.54826	0.809815	0.864087
0	0.291844	0.883453	0.86005	0.939077	0.833436	0.935884
0.170508	0.382979	0.578856	0	0.421669	0.557932	0.410141
0	0.263652	0.194116	0.330583	0.374088	0.506555	0.56199
0	0.257339	0.194738	0.622053	0.429203	0.579621	0.463515
0	0.152918	0	0.514927	0.319414	0.455378	0.330937
0	0.263333	0.317428	0.511947	0.542329	0.533998	0.544206
0	0.431707	0.537661	0.525013	0.507845	0.565073	0.592474
0	0	0	0	0	0	0.150152
0.17591	0.325626	0.331395	0.558161	0.612085	0.543398	0.576096
0.287018	0.497629	0.419448	0.760446	0.670467	0.722997	0.782243
0	0	0	0	0	0	0
0.0790344	0.269177	0.488674	0.650095	0.579968	0.332382	0.359535
0.349794	0.491583	0.498625	0.52051	0.491272	0.443985	0.482646
0.192109	0.547224	0.563406	0.63252	0.581261	0.543066	0.586658
0.173396	0.51523	0.666858	0.578934	0.581125	0.611032	0.626841
0.488427	0.557567	0.289292	0.590797	0.605549	0.583623	0.302432
0.0693464	0.272026	0.440518	0.446533	0.309984	0.439014	0.458813
0	0	0.914495	0.93849	0.918245	0	0
0.14631	0.159755	0.390147	0.300826	0.297844	0.251648	0.413454
0.135863	0.276084	0.285201	0.293218	0.357887	0.334963	0.404927
0	0.220022	0.595253	0.581494	0.537534	0.550081	0.620395
0.33013	0.42943	0.356016	0.504807	0.342481	0.317569	0.352448
0.226932	0.378222	0.437133	0.520317	0.421285	0.276197	0.303118
0	0.0972201	0.123793	0.384531	0.353792	0.349424	0.389703
0.0535517	0.199573	0.293147	0.337408	0.34183	0.306812	0.335773
0.370642	0.491015	0.531043	0.744239	0.664261	0.490502	0.537175
0.283947	0.566827	0.478202	0.485943	0.403529	0.36516	0.475358
0	0.126767	0.29627	0.470682	0.294323	0.330536	0.240767
0.551293	0.594023	0.587472	0.614777	0.607962	0.575904	0.623846
0.334339	0.355934	0.376039	0.367718	0.526203	0.518646	0.544085
0.113163	0.50361	0.520992	0.61546	0.610419	0.580811	0.491037
0.346892	0.398211	0.437173	0.409474	0.403693	0.379406	0.414359
0	0.272051	0.310776	0.471378	0.281544	0.236065	0.516231
0	0.540606	0.889741	0.845059	0.527634	0.516355	0.565287
0.201114	0.422438	0.859288	0.674123	0.439691	0.420574	0.458501
0.297048	0.297812	0.611413	0.605146	0.325105	0.276189	0.325906
0.339874	0	0.420985	0.411982	0.438609	0.396282	0.432313
0	0.406492	0.316791	0.332144	0.442241	0.397546	0.418862
0.476724	0.461261	0.466657	0.452927	0.469485	0.442263	0.481967
0.857606	0.709662	0.933747	0.78218	0.82669	0.772775	0.786311
0	0	0	0	0	0.633826	0.711963
0.0937899	0.194852	0.186566	0.466525	0.195336	0.321693	0.469466
0	0	0.402176	0.382722	0	0.180532	0.334594
0	0.277264	0.579609	0.58907	0.262495	0.154532	0.503106
0	0.106072	0.254744	0.403872	0.135512	0.251467	0.28771
0.125863	0.515825	0.714998	0.703032	0.353553	0.753323	0.691873
0.321581	0.519441	0.596584	0.568233	0.575687	0.510207	0.580281
0.328622	0.50104	0.67006	0.549571	0.537677	0.50074	0.533629
0	0	0	0.786227	0	0.470174	0.720836
0.413845	0.437938	0.467778	0.457774	0.465058	0.416312	0.4545
0.185214	0.27084	0.520389	0.34489	0.359189	0.314533	0.371168
0	0	0.864023	0.941228	0.916894	0.741542	0.906171
0.0848231	0.263846	0.237786	0.390258	0.410955	0.401009	0.463218
0.455317	0.450739	0.946437	0.852034	0.488125	0.44293	0.857811
0.239544	0.43863	0.461708	0.537903	0.713091	0.684978	0.591809
0.432903	0.62514	0.75024	0.766564	0.647492	0.717834	0.774291
0.319805	0.49961	0.599319	0.695345	0.674177	0.644906	0.7859
0.416231	0.551153	0.545225	0.53932	0.654436	0.525797	0.649538
0.400927	0.53744	0.618956	0.712933	0.583393	0.52771	0.593149
