# Supplementary material
Source: ML conference proceedings conference paper supplement (https://openreview.net/forum?id=dAYodxl90f)
Supplement: supplementary_material [file 2024012408_nextacc.xlsx]

## Sheet: Sheet1
m2	m3	m4	m8	y5m	y5l	y5x
0	0	0	0	0	0	0
0	0	0	0	0	0	0
0	0	0	0	0	0	0
0	0	0	0	0	0	0
0	0	0	0	0	0	0
0	0	0	0	0	0	0
0	0	0	0	0	0	0
0	0	0	0	0	0	0
0.405995	0.340819	0.32499	0.321999	0.352922	0.363243	0.353126
0	0	0	0	0	0	0
0	0	0	0	0	0	0
0	0	0	0	0	0	0
0	0	0	0	0	0	0
0	0	0	0	0	0	0
0	0	0.1416	0.119927	0	0.124038	0.140246
0.075744	0.0898481	0.0851432	0.087799	0.0835736	0.0881235	0.0875427
0	0.110537	0.098072	0.103865	0.191192	0.093267	0.0929252
0.0656773	0.116033	0	0	0	0	0
0.103418	0.103922	0.106098	0.0990354	0.107977	0.103465	0.104351
0	0	0	0.0573079	0	0	0.0466325
0.123454	0.0666243	0	0.0680465	0.113773	0.0632509	0.0621003
0.253999	0.437396	0.133314	0.434761	0.147374	0.131591	0.464256
0	0	0	0	0	0	0
0	0	0	0	0	0	0
0	0	0	0	0	0	0
0	0	0	0	0	0	0
0.0531501	0.116263	0.0549972	0.0577322	0.0569852	0.0465384	0
0	0.143378	0.0687508	0.0696271	0.128126	0.144005	0.0679801
0	0	0	0	0	0	0
0	0	0	0	0	0	0
0	0	0	0	0	0	0
0	0	0	0	0	0	0
0	0	0	0	0	0	0
0	0	0	0	0	0	0
0	0	0	0	0	0	0
0	0	0	0	0	0	0
0.0565207	0.0511729	0.0650194	0.0644184	0.0611783	0.0592004	0.0608562
0	0	0.0611105	0.0281536	0.0572794	0	0.0313157
0	0.107734	0.0515078	0.0524836	0	0	0.0512596
0.0674331	0.0678986	0.0653652	0.0615626	0.0633336	0.0663627	0.0633219
0.171119	0.170086	0.174925	0.16848	0.167613	0.166287	0.164865
0.137087	0.127295	0.254809	0.135539	0	0	0
0.0751327	0	0	0	0	0	0
0	0	0	0	0	0	0
0	0	0	0	0	0	0
0	0	0	0	0	0	0
0	0	0	0	0	0	0
0	0	0	0	0	0	0
0	0	0	0	0	0	0
0	0	0	0	0	0	0
0	0	0	0	0	0	0
0	0	0	0	0	0	0
0	0.0579827	0.104681	0.0533464	0.0470591	0.0910956	0.0893671
0	0.167649	0.225769	0.2535	0.0498571	0.186787	0.139904
0	0.132977	0.167962	0.176013	0.171894	0.170895	0.21253
0.0945216	0.122767	0.165505	0.162456	0.189453	0.145413	0.155113
0.0705352	0.35487	0.349996	0.341582	0.386675	0.355424	0.39106
0.0385266	0.296284	0.179945	0.255758	0.251373	0.20541	0.211965
0.037342	0.187511	0.139756	0.197298	0.177938	0.15057	0.247147
0	0.189938	0.0800937	0.0725455	0.191667	0.212992	0.128499
0	0.0405255	0.0454526	0.132915	0.0452063	0.0895803	0.0956731
0	0.09705	0.0430155	0.110981	0.0450864	0.0433546	0.045295
0	0.0395943	0	0	0	0	0
0.0382046	0.0789008	0.0855284	0.0773019	0.0807525	0.123785	0.127579
0.110586	0.113504	0.118107	0.121703	0.113379	0.210844	0.168967
0	0	0.0742605	0.0649116	0	0.0594543	0.0686658
0	0	0	0	0	0	0
0.0509292	0.0791625	0.0886065	0.0888258	0.0878925	0.144313	0.133066
0	0.0642219	0.121759	0.122384	0.121909	0.121329	0.128673
0	0.0805279	0.0400292	0.0734313	0.039205	0.0397663	0.0402509
0.0736842	0.106175	0.199703	0.279116	0.146975	0.203157	0.267833
0	0.230995	0.186343	0.181008	0.195932	0.195393	0.196786
0	0.108575	0.107137	0.063662	0.107189	0.115124	0.112858
0.0526022	0.20819	0.341896	0.480701	0.255134	0.38907	0.402091
0	0.0994919	0.10916	0.109594	0.0674606	0	0.0682042
0.0310512	0.033791	0.0367214	0.0368066	0.0341343	0.0346548	0.0345843
0.102994	0.0859208	0.158912	0.181188	0.115214	0.0887592	0.132344
0.0633126	0.186618	0.178032	0.172948	0.174983	0.177775	0.17657
0.11593	0.358743	0.407706	0.43956	0.420489	0.445597	0.432081
0	0.0251786	0.0263393	0.0283772	0.0289901	0.0273116	0.0262121
0	0.0209898	0.046238	0.0479775	0.0480201	0.0222196	0.0228756
0.0473401	0	0	0.0416928	0	0.0416138	0
0	0	0	0.0930564	0	0	0
0	0	0	0	0	0	0
0	0	0	0	0	0	0
0	0	0	0	0	0	0
0	0	0	0	0	0	0
0	0	0	0	0	0	0
0	0	0	0	0	0	0
0	0	0	0	0	0	0
0	0	0	0	0	0	0
0	0	0	0	0	0	0
0	0	0	0	0	0	0
0	0	0	0	0	0	0
0	0	0	0	0	0	0
0	0	0	0	0	0	0
0	0	0	0	0	0	0
0	0	0	0	0	0	0
0	0	0	0	0	0	0
0	0	0	0	0	0	0
0	0	0	0	0	0	0
0	0	0	0	0	0	0
0	0	0	0	0	0	0
0	0	0	0	0	0	0
0	0	0	0	0	0	0
0	0	0	0	0	0	0
0	0	0	0	0	0	0
0	0	0	0	0	0	0
0	0	0	0	0	0	0
0	0	0	0	0	0	0
0.149953	0.141867	0.149566	0	0.152602	0.13007	0.169292
0	0	0	0	0	0	0
0	0	0	0	0	0	0
0	0	0	0.0968101	0	0	0
0.112311	0.218471	0.221454	0.237115	0.232594	0.240459	0.251547
0	0	0.0886648	0	0	0	0.0862115
0.07925	0.154007	0.307335	0.341136	0.152671	0.258378	0.248035
0.0840179	0.339098	0.402948	0.599563	0.39717	0.377984	0.391423
0	0.108819	0.080276	0.125893	0.0749634	0.134548	0.123952
0	0	0	0	0	0	0
0	0	0	0	0	0	0
0	0	0	0	0	0	0
0	0	0	0	0	0	0
0	0	0	0	0	0	0
0	0	0.0512879	0	0	0	0.0505065
0	0	0	0	0	0	0
0	0.0554357	0	0	0	0.0443119	0
0	0	0	0	0	0	0
0	0	0	0	0	0	0
0	0	0	0	0	0	0
0	0	0	0	0	0	0
0	0	0	0	0	0	0
0	0	0	0	0	0	0
0	0	0	0	0	0	0
0	0	0	0	0	0	0
0	0	0	0	0	0.0850625	0.195488
0	0.126478	0	0.210695	0.132047	0.122701	0.13056
0.0763734	0.0705995	0.0805405	0.0832993	0.086803	0.0854453	0.0866584
0	0.0333368	0	0	0.0338036	0	0.034283
0.0736929	0.0863919	0.15375	0.0759109	0	0	0.0728296
0.141341	0.28449	0.302389	0.298719	0.29574	0.28802	0.298462
0.108618	0.115701	0.10075	0.108258	0.106251	0.109918	0.107881
0	0.215704	0.179577	0.183817	0.192697	0.313524	0.171142
0	0	0	0	0	0	0
0	0.0968537	0.0970817	0.195021	0	0.0968691	0.103551
0	0.14485	0.110168	0.21779	0.120691	0.220518	0.215016
0	0	0.156394	0.0899174	0.113127	0.10415	0.096448
0	0	0.168224	0.164384	0.117064	0.248391	0.326192
0	0.0979437	0.135729	0.10397	0	0.0858404	0.118176
0	0.101565	0.210285	0.327134	0.182252	0.20305	0.220406
0	0.0599647	0.346209	0.322153	0.380613	0.416651	0.440169
0	0.286516	0.373707	0.167984	0	0.333766	0.330022
0	0	0	0	0.0503327	0	0
0	0.0875	0	0	0	0.062957	0.151879
0.158195	0.1661	0.091592	0.1647	0.0815031	0	0
0.0811036	0.302919	0.232921	0.393949	0.317932	0.14446	0.230854
0.0646157	0.215699	0.270535	0.153716	0.271589	0.412415	0.341473
0.061155	0.43297	0.607324	0.612313	0.59858	0.619057	0.620853
0.0589907	0.28719	0.286241	0.359752	0.405901	0.360515	0.407496
0	0.126171	0.208571	0.214726	0.24236	0.235377	0.231339
0.0836186	0.156236	0.210391	0.256489	0.22535	0.14278	0.143827
0	0	0	0	0	0	0
0	0	0	0	0	0	0
0	0	0	0	0	0	0
0	0	0	0	0	0	0
0	0	0	0	0	0	0
0	0	0	0	0	0	0
0	0	0	0	0	0	0
0	0	0	0	0	0	0
0	0	0	0	0	0	0
0	0	0	0	0	0	0
0	0	0	0	0	0	0
0	0	0	0	0	0	0
0	0	0	0	0	0	0
0	0	0	0	0	0	0
0	0	0	0	0	0	0
0	0	0	0	0	0.0607161	0.0588099
0	0.146698	0.139516	0.142254	0.152595	0.155704	0.151484
0.138029	0.38996	0.180545	0.211865	0.1697	0.240267	0.163046
0.161471	0.196131	0.141191	0.144302	0.200981	0.20847	0.13765
0.0547447	0.141987	0.146191	0.20521	0.147876	0.277003	0.202899
0.0828148	0.187777	0.337283	0.386359	0.276512	0.300513	0.327511
0	0.355817	0.385587	0.544441	0.264795	0.330779	0.334764
0	0	0	0	0	0	0
0	0	0	0.0594896	0	0	0.0626655
0	0.0714525	0	0	0	0	0
0	0	0	0	0	0	0
0	0	0	0	0	0	0
0	0	0	0	0	0	0
0	0	0	0	0	0	0
0	0	0	0	0	0	0
0	0	0	0	0	0	0
0	0	0	0	0	0	0
0	0	0	0	0	0	0
0	0	0	0	0	0	0
0	0	0	0	0	0	0
0	0	0	0	0	0	0
0	0	0	0	0	0	0
0	0	0	0	0	0	0
0	0	0	0	0	0	0
0	0	0	0	0	0	0
0	0	0	0	0	0	0
0	0.209952	0.251747	0.230912	0.247111	0.247538	0.242865
0	0	0	0	0	0	0
0	0	0	0	0	0	0
0	0	0	0	0	0	0
0	0	0	0	0	0	0
0	0	0	0	0	0	0
0	0	0	0	0	0	0
0	0	0	0	0	0	0
0	0	0	0	0	0	0
0	0	0	0	0	0	0
0	0	0	0	0	0	0
0	0	0	0	0	0	0
0	0	0	0	0	0	0
0	0	0	0	0	0	0
0	0	0	0	0	0	0
0	0	0	0	0	0	0
0	0	0	0.0576327	0	0	0
0	0	0	0.102855	0	0	0
0	0.102032	0.0981985	0.0941174	0.0953302	0.0954003	0.102516
0	0	0	0	0	0	0
0	0	0	0	0	0	0
0.0501301	0.124179	0.128492	0.128648	0.132561	0.126369	0.134613
0.12351	0.251477	0.240514	0.121943	0.264933	0.263116	0.253705
0.14321	0.314266	0.320485	0.357672	0.370867	0.347895	0.373629
0.183702	0.290309	0.448763	0.535422	0.519918	0.606882	0.525787
0.171691	0.364579	0.387443	0.451976	0.364527	0.352314	0.416927
0.19514	0.180166	0.0967971	0.0913863	0.188352	0.190874	0.0978996
0.10768	0	0.10292	0	0.108358	0.105222	0
0	0	0	0	0	0	0
0	0	0	0	0	0	0
0	0	0	0	0	0	0
0	0	0	0.148606	0.171373	0	0
0	0	0	0	0	0	0
0	0	0	0	0	0	0
0	0	0	0	0	0	0
0	0	0	0	0	0	0
0	0	0	0	0	0	0
0	0	0	0	0	0	0
0	0	0	0	0	0	0
0	0.413414	0.399064	0.253698	0.478848	0.483551	0.468458
0	0	0	0	0	0	0
0	0	0	0	0	0	0
0	0	0	0	0	0	0
0	0	0	0	0	0	0
0	0	0	0	0	0	0
0	0	0.298013	0.311688	0	0.336105	0.369142
0	0.580109	0.602098	0.635119	0.63996	0.691004	0.656002
0	0	0.420143	0.416039	0.416017	0.411744	0.401391
0	0.765105	0.766534	0.736615	0.779425	0.781604	0.84589
0	0.12799	0.1572	0.152766	0.16173	0.174725	0.174095
0	0.102059	0.280965	0.344323	0.130519	0.128912	0.145534
0	0.173333	0.282766	0.26529	0.153352	0.163104	0.176916
0	0.101353	0.0941358	0.0917396	0.0873749	0.0869787	0.0994111
0	0.125378	0.119008	0.120206	0.102311	0.0991382	0.106414
0	0	0	0	0	0	0
0	0	0	0	0	0	0
0	0	0	0	0	0	0
0	0	0	0.121108	0	0.0626245	0
0	0	0	0	0	0	0
0	0	0	0.0344773	0	0.0369991	0.0398301
0	0	0	0	0	0	0
0	0	0	0	0	0	0
0	0	0	0	0	0	0
0	0	0	0	0	0	0
0	0	0	0	0	0	0
0	0	0	0	0	0	0
0	0	0	0	0	0	0
0	0	0	0	0	0	0
0	0	0	0	0	0	0
0	0	0	0	0	0	0
0	0	0	0	0	0	0
0	0	0	0	0	0	0
0	0	0	0	0	0	0
0	0	0	0	0	0	0
0	0	0	0	0	0	0
0	0	0	0	0	0	0
0	0	0	0	0	0	0
0	0.359181	0.40411	0.417453	0.43495	0.428035	0.437052
0	0	0	0	0	0	0
0	0	0	0	0	0	0
0	0	0	0	0	0	0
0	0	0	0	0	0	0
0	0	0	0	0	0	0
0	0	0	0	0	0	0
0	0	0	0	0	0	0
0	0	0	0	0	0	0
0	0	0	0	0	0	0
0	0	0	0	0	0	0
0	0	0	0	0	0	0
0	0	0	0	0	0	0
0	0	0	0	0	0	0
0	0	0	0	0	0	0
0	0	0	0	0	0	0
0	0	0	0	0	0	0
0.210297	0.126684	0.123125	0.123017	0.135762	0.119827	0.112638
0.302882	0.45695	0.284071	0.476355	0.271805	0.443901	0.276082
0	0	0	0	0	0	0
0	0	0	0	0	0	0
0	0	0	0	0	0	0
0	0	0	0	0	0	0
0	0	0	0	0	0	0
0	0	0	0	0	0	0
0	0	0	0	0	0	0
0	0	0	0	0	0	0
0	0	0	0	0	0	0
0	0	0	0	0	0	0
0	0	0	0	0	0	0
0	0	0	0	0	0	0
0	0	0	0	0	0	0
0	0	0	0	0	0	0
0	0	0	0	0	0	0
0	0	0	0	0	0	0
0	0	0	0	0	0	0
0	0	0	0	0	0	0
0	0	0	0	0	0	0
0	0	0	0	0	0	0
0	0	0	0	0	0	0
0	0	0	0	0	0	0
0	0	0	0	0	0	0
0	0	0	0	0	0	0
0	0	0	0	0	0	0
0	0	0	0	0	0	0
0	0	0	0	0	0	0
0	0	0	0	0	0	0
0	0.108177	0	0	0	0	0
0	0	0	0	0	0	0
0	0	0	0	0	0	0
0	0	0	0	0	0	0
0	0	0.0593963	0.0817046	0	0	0
0.102487	0.102524	0.102945	0.102436	0.106225	0.104074	0.103777
0	0	0.218271	0.291145	0.320582	0.296287	0.299041
0	0	0	0	0	0	0
0	0	0	0	0	0	0
0	0.315591	0.335215	0.371199	0.391979	0.371393	0.377557
0	0.0399546	0.0421348	0.0533287	0.0586091	0.0587053	0.0553632
0	0	0	0	0	0	0
0	0	0	0	0	0	0
0	0	0	0	0	0	0
0	0	0	0	0	0	0
0.165004	0.160597	0.159918	0.15676	0.160927	0.163592	0.164311
0.140054	0.142668	0.143164	0.147851	0.146146	0.147242	0.146911
0.214402	0.235423	0.215928	0.215075	0.216379	0.212688	0.212181
0.182305	0.381497	0.382878	0.37775	0.367847	0.375789	0.375865
0	0.139035	0.201754	0.191475	0.187307	0.189298	0.187726
0	0	0.306147	0.311982	0.297273	0.298856	0.311886
0	0	0.222141	0.195402	0.208033	0.216687	0.214316
0	0.0935941	0.131131	0.128951	0.132091	0.133745	0.136146
0	0	0	0	0	0	0
0	0	0	0	0	0	0
0	0	0	0	0	0	0
0	0	0	0	0	0	0
0.355271	0.360063	0.322221	0.253884	0.343444	0.350009	0.341403
0	0	0	0	0	0	0
0	0	0	0	0	0	0
0	0	0	0	0	0	0
0	0	0.321514	0.359933	0	0	0.353677
0	0	0.398337	0.398337	0.332818	0.320242	0.355868
0	0	0	0	0	0	0
0	0	0	0	0	0	0
0	0	0	0	0	0	0
0	0	0	0	0	0	0
0	0	0	0	0	0	0
0	0	0	0	0	0	0
0	0	0	0	0	0	0
0	0	0	0	0	0	0
0	0	0	0	0	0	0
0	0	0	0	0	0	0
0	0	0	0	0	0	0
0	0	0	0	0	0	0
0	0	0	0	0	0	0
0	0	0	0	0	0	0
0	0	0	0	0	0	0
0	0	0	0	0	0	0
0	0	0	0	0	0	0
0	0	0	0	0	0	0
0	0	0	0	0	0	0
0	0	0	0	0	0	0
0	0	0	0	0	0	0
0	0	0	0	0	0	0
0	0	0	0	0	0	0
0	0	0	0	0	0	0
0	0	0	0	0	0	0
0	0	0	0	0	0	0
0	0	0	0	0	0	0
0	0	0	0	0	0	0
0	0	0	0	0	0	0
0	0	0	0	0	0	0
0	0	0	0	0	0	0
0	0	0	0	0	0	0
0.135225	0.131982	0.129475	0.132832	0.133039	0.13299	0.130207
0	0	0.0890864	0	0	0	0
0	0	0	0	0	0	0
0	0.0887813	0.113173	0.10515	0.0948159	0.107603	0.107324
0	0.133333	0.329728	0.450617	0.153874	0.167926	0.31859
0	0.132582	0.144526	0.164548	0.138816	0	0.164438
0	0	0.17817	0.102576	0.0937482	0.090793	0.104438
0	0	0	0	0	0	0
0	0	0	0	0	0	0
0	0	0	0	0	0	0
0	0	0	0.109682	0	0.100103	0
0	0	0	0	0	0	0
0	0	0	0	0	0	0
0	0	0	0	0	0	0
0	0	0.0729905	0.0673759	0.0754671	0.0711171	0.0724164
0	0	0	0	0	0	0
0	0.0842713	0.0349162	0	0.066893	0.0712534	0.034893
0	0.0329925	0.075498	0.0693741	0.0305421	0.0311047	0.0353309
0	0	0	0	0	0	0
0	0	0	0	0	0	0
0	0	0	0	0	0	0
0	0	0	0	0	0	0
0	0	0	0	0	0	0
0	0	0	0	0	0	0
0	0	0	0	0	0	0
0	0	0	0	0	0	0
0.192598	0.350701	0.372903	0.379733	0.362157	0.369428	0.359707
0.251468	0.235311	0.251366	0.240326	0.2435	0.240246	0.241215
0	0	0	0	0	0	0
0	0	0	0	0	0	0
0.12525	0	0	0.13904	0.133297	0.135623	0.134099
0	0	0	0	0	0	0
0	0	0	0	0	0	0
0	0	0	0	0	0	0
0	0	0	0	0	0	0
0	0	0	0	0.103065	0.094319	0.0931347
0	0.666144	0.837855	0.738512	0.803234	0	0
0	0	0	0	0	0	0
0	0	0	0	0	0	0
0	0	0	0	0	0	0
0	0.0799473	0.0964801	0.0962783	0	0	0
0	0	0	0.0940471	0	0.0906659	0.0938733
0	0	0	0	0	0	0
0	0	0	0	0	0.0475506	0.0461979
0	0	0	0.0563394	0.0596489	0	0.058848
0	0	0	0	0	0	0
0	0	0	0	0	0	0
0	0	0	0	0	0	0
0	0	0	0	0	0	0
0	0	0	0	0	0	0
0	0	0	0	0	0	0
0	0	0	0	0	0	0
0	0	0	0	0	0	0
0	0	0	0	0	0	0
0	0	0	0	0	0	0
0	0	0	0	0	0	0
0	0	0	0	0	0	0
0	0	0	0	0	0	0
0	0	0	0	0	0	0
0	0	0	0	0	0	0
0	0	0	0	0	0	0
0	0	0	0	0	0	0
0	0	0.0932694	0.176421	0.0938936	0.101157	0.0937866
0	0.138509	0.387949	0.40086	0.391551	0.168717	0.354506
0	0.140963	0.152697	0.14538	0.147433	0.164913	0.153986
0.112585	0.201331	0.0919577	0.156619	0.198492	0.157178	0.279615
0	0.107976	0.113513	0.0873045	0.105996	0.21805	0.194141
0	0.105895	0.118058	0.111263	0.126235	0.0675467	0.130254
0	0.0998789	0.107846	0.0997783	0.103072	0.116123	0.107583
0	0.106938	0.108403	0.148389	0.110718	0.110671	0.114315
0	0.0716763	0	0.0763463	0.0926857	0.146312	0.0926564
0	0.0824812	0.0998711	0.200605	0.262591	0.186452	0.18612
0	0.128037	0	0.131336	0.120314	0.116481	0.120426
0	0	0	0	0	0	0.0741394
0	0	0	0	0	0	0
0	0	0	0	0	0	0
0	0	0	0	0	0	0
0	0	0	0	0	0	0
0	0	0	0	0	0	0
0	0	0	0	0	0	0
0	0	0	0	0	0	0
0	0	0	0	0	0	0
0.0539872	0.0528014	0.114116	0.114315	0.0542642	0.055075	0
0	0	0	0	0	0	0
0	0	0	0	0	0	0
0	0	0	0	0	0	0
0	0	0	0	0	0	0
0	0	0	0.139886	0	0	0
0	0	0	0	0	0	0
0	0	0	0	0	0	0
0	0	0	0	0	0	0
0	0	0	0	0	0	0
0	0	0	0	0	0	0
0	0	0	0	0	0	0
0	0	0	0	0	0	0
0	0	0	0	0	0	0
0	0	0	0	0	0	0
0	0	0	0	0	0	0
0	0	0	0	0	0	0
0	0	0	0	0	0	0
0	0	0	0	0	0	0
0	0	0	0	0	0	0
0	0	0	0	0	0	0
0	0	0	0	0	0	0
0	0	0	0	0	0	0
0	0	0	0	0	0	0
0	0	0	0	0	0	0
0	0	0	0	0	0	0
0	0	0	0	0.0628636	0.0566699	0
0	0	0	0	0	0	0.025924
0.0468158	0.0871312	0.04266	0	0.0821139	0.0829187	0.0915578
0	0.0606203	0.11316	0.105675	0.100052	0.138642	0.157376
0	0.12524	0.162051	0.114062	0.0517027	0.144801	0.179543
0	0.0539159	0.18048	0.103927	0.139547	0.146539	0.238168
0	0.184334	0.192186	0.18747	0.178998	0.190663	0.269993
0	0.0847458	0	0.0816559	0.0774512	0.168277	0.172805
0	0.106739	0.0596303	0.120305	0.107899	0.173888	0.187085
0.0337523	0.0381923	0.133274	0.139305	0.140246	0.134622	0.183624
0.0390156	0.123695	0.142177	0.139811	0.158153	0.160974	0.174061
0.0518367	0.179564	0.156107	0.277454	0.18456	0.279831	0.243094
0.0701821	0.114231	0.17159	0.134764	0.169113	0.212914	0.171433
0.0374207	0.105687	0.188602	0.286104	0.15	0.315301	0.270438
0	0.101114	0.111717	0.194286	0.231622	0.204557	0.256031
0	0	0.159025	0.221162	0.112446	0.274468	0.255647
0	0	0	0	0	0	0
0	0	0	0.0384236	0	0.0380905	0.0389865
0	0.206872	0.0897358	0.0897358	0.188848	0.104637	0.105192
0	0	0	0	0	0	0
0	0	0	0	0	0	0
0	0	0	0	0	0	0
0	0	0	0	0	0	0
0	0	0	0	0	0	0
0	0	0	0	0	0	0
0	0	0	0	0	0	0
0	0	0	0	0	0	0
0	0	0	0	0	0	0
0	0	0	0	0	0	0
0	0	0	0	0	0	0
0	0	0	0	0	0	0
0	0	0	0	0	0	0
0	0	0	0	0	0	0
0	0	0	0	0	0	0
0	0	0	0	0	0	0
0	0	0	0	0	0	0
0	0	0	0	0	0	0
0	0	0	0	0	0	0
0	0	0	0	0	0	0
0	0	0	0	0	0	0
0	0	0	0	0	0	0
0	0	0	0	0	0	0
0	0	0	0	0	0	0
0	0	0	0	0	0	0
0	0	0	0	0	0	0
0	0	0	0	0	0	0
0.103577	0	0	0	0	0	0
0	0	0	0	0	0	0
0	0	0	0	0	0	0
0	0	0	0	0	0	0
0	0	0	0	0	0	0
0	0	0	0	0	0	0
0	0	0	0	0	0	0
0	0	0	0	0	0	0
0	0	0	0	0	0	0
0	0	0	0	0	0	0
0	0	0	0	0	0	0
0	0	0	0	0	0	0
0	0	0	0	0	0	0
0	0	0	0	0	0	0
0	0	0	0	0	0	0
0	0	0	0	0	0	0
0	0	0	0	0	0	0
0	0	0	0	0	0	0
0	0	0	0	0	0	0
0	0	0	0	0	0	0
0	0	0	0	0	0	0
0	0	0	0	0	0	0
0	0	0	0	0	0	0
0	0	0	0	0	0	0
0	0	0.0534224	0.0523303	0	0	0.0555907
0	0.0843187	0.08028	0.0813098	0.0677766	0.0752001	0.0742548
0.0794185	0.177365	0.124975	0.172152	0.181447	0.226788	0.168093
0.0472727	0	0.0395511	0	0	0	0
0.0589327	0.0500738	0	0	0.114221	0	0.0541406
0	0.0394138	0.0747023	0.120284	0.0385217	0.0744636	0.0764144
0.0563731	0.101713	0.134721	0.195327	0.0515153	0.0499423	0.18637
0	0.122586	0.148865	0.142629	0	0.138555	0.137219
0	0	0	0	0	0	0
0	0	0	0	0.0668889	0.071819	0
0	0	0	0	0	0	0
0	0	0	0	0	0	0
0	0.130449	0.0656753	0.243239	0.132748	0.146578	0.141233
0	0.0871374	0.0668259	0	0.154367	0.282333	0.221361
0	0.0763013	0.0839596	0.086013	0.0908685	0.0860884	0.090847
0.0334494	0.0420366	0.0343914	0.0350223	0.0352182	0.0359562	0.0343684
0	0.154547	0.0722436	0	0	0.0746295	0
0	0.0512064	0.0596252	0.0559441	0	0.0581399	0.0483108
0	0	0	0	0	0	0
0	0	0	0	0	0	0
0	0.0463885	0.0987033	0.0483674	0.0933649	0.0950646	0.160707
0	0.0785133	0.0743664	0.0802201	0.0795779	0.0732893	0.0728776
0	0	0	0	0	0	0
0	0	0.126316	0	0	0	0.152997
0.135592	0.142446	0.135676	0.138143	0.142239	0.141188	0.140638
0.53009	0.508039	0	0	0	0	0.510254
0	0	0	0	0	0	0
0	0	0	0	0	0	0
0.263052	0.257664	0	0	0	0	0
0	0	0	0	0	0	0
0.634431	0.558183	0.584421	0.581412	0.57843	0.573569	0.578406
0	0	0	0	0	0	0
0	0	0	0	0	0	0
0	0	0	0	0	0	0
0	0.0818891	0	0.0774433	0	0	0
0	0	0	0	0	0	0
0.0328571	0	0	0	0	0	0
0	0	0	0	0	0	0
0	0	0	0	0	0	0
0	0	0	0	0	0	0
0	0	0	0	0	0	0
0	0	0	0	0	0	0
0	0	0	0	0	0	0
0	0	0	0	0	0	0
0	0	0	0	0	0	0
0	0	0	0	0	0	0
0	0	0	0	0	0	0
0.125783	0	0	0	0.13595	0.147039	0.13478
0	0.0543437	0.0615748	0.0653578	0.0659648	0.0646998	0.0657942
0.0893887	0.131148	0.155317	0.157537	0.0706201	0.0632041	0.146768
0.0409344	0.0446343	0.0709729	0.0408304	0.0443936	0.040944	0.0405168
0.131411	0.118691	0.348695	0.354451	0.244413	0.239288	0.230158
0.132002	0.179132	0.251069	0.245334	0.250675	0.307667	0.364417
0.221367	0.34155	0.282718	0.277932	0.290116	0.286389	0.280602
0.106997	0.144613	0.216671	0.0942517	0.149458	0.150407	0.211032
0.0801233	0.337225	0.351748	0.350766	0.363909	0.481084	0.498083
0.202183	0.330228	0.421007	0.367036	0.353714	0.409206	0.421104
0.199084	0.259104	0.347533	0.47251	0.358633	0.305416	0.299342
0.192525	0.256731	0.209662	0.238113	0.24385	0.197955	0.189847
0	0.050734	0.0562996	0.153409	0.120012	0.129764	0.126657
0	0.0538109	0.121858	0.130434	0.180932	0.143737	0.135089
0	0.069063	0.0838363	0.167848	0.174543	0.179521	0.178518
0	0.232552	0.260486	0.487671	0.355399	0.305064	0.376552
0	0.450925	0.476541	0.513153	0.522453	0.526899	0.526687
0	0.161398	0.197891	0.198642	0.184215	0.190064	0.192618
0.0494502	0.167576	0.187419	0.189382	0.195436	0.198825	0.195535
0	0.0520759	0.180526	0.111999	0.145029	0.181886	0.219112
0	0.0783109	0.170129	0.0962576	0.101898	0.244664	0.248447
0.0525653	0.0930695	0.16395	0.222178	0.165141	0.125117	0.174073
0	0.0731505	0.0794411	0.0823264	0.0881105	0.0871785	0.0805338
0	0	0.0471303	0.108734	0.0505054	0.0599124	0.056705
0	0.056914	0.0586562	0.0717066	0.0629797	0.0618721	0.0645368
0.132986	0.123308	0.109536	0.102273	0	0	0.107135
0	0	0	0	0	0	0
0	0	0	0	0	0	0
0	0	0	0	0	0	0
0	0	0	0	0	0	0
0	0	0	0	0	0	0
0	0	0	0	0	0	0
0	0	0	0	0	0	0
0	0	0	0	0	0	0
0	0	0	0	0	0	0
0	0	0	0	0	0	0
0	0	0	0	0	0	0
0	0	0	0	0	0	0
0	0	0	0	0	0	0
0	0	0	0	0	0	0
0	0	0	0	0	0	0
0	0	0	0	0	0	0
0	0	0	0	0	0	0
0	0	0	0	0	0	0
0	0	0	0	0	0	0
0	0	0	0	0	0	0
0	0	0	0	0	0	0
0	0	0	0	0	0	0
0	0	0	0	0	0	0
0	0	0	0	0	0	0
0	0	0	0	0	0	0
0	0	0	0	0	0	0
0	0	0	0	0	0	0
0	0	0	0	0	0	0
0	0	0	0	0	0	0
0	0	0	0	0	0	0
0	0	0	0	0	0	0
0	0	0	0	0	0	0
0	0	0	0	0	0	0
0	0	0	0	0	0	0
0	0	0	0	0	0	0
0	0	0	0	0	0	0
0	0	0	0	0	0	0
0	0	0	0	0	0	0
0	0	0	0	0	0	0
0.818118	0.89624	0.886112	0.901078	0.925157	0.927633	0.934831
0.827522	0.890682	0.912409	0.931868	0.971262	0.972003	0.976736
0.431718	0.440375	0.461706	0.431682	0.443137	0.442801	0.448905
0.207363	0.232463	0.22734	0.233589	0.244192	0.244719	0.242637
0.417458	0.856897	0.828727	0.832077	0.89115	0.919458	0.899011
0	0	0	0	0	0	0
0	0	0	0	0	0	0
0	0	0	0	0	0	0
0	0	0	0	0	0	0
0	0	0	0	0	0	0
0	0	0	0	0	0	0
0	0	0	0.0666667	0	0	0.0725668
0.320887	0.273733	0.570011	0.548099	0.305857	0.303402	0.306329
0.194998	0.195718	0.151703	0.162652	0.198992	0.195705	0.197438
0	0.392884	0	0.436265	0.453561	0.450046	0.443371
0	0.10906	0.10901	0.110255	0.11342	0.110474	0.111525
0.21786	0.232903	0.233177	0.378938	0.222122	0.348653	0.366818
0	0	0	0	0	0	0
0	0	0	0	0	0	0
0	0	0	0	0	0	0
0	0	0	0	0	0	0
0	0	0	0	0	0	0
0	0	0	0	0	0	0
0	0	0	0	0	0	0
0	0	0	0	0	0	0
0	0	0	0	0	0	0.0475162
0	0	0	0	0	0	0
0	0.154461	0.294879	0.397395	0.177675	0.213437	0.234467
0	0.077918	0.283311	0.21825	0.0765719	0.0685654	0.147324
0	0	0.0506494	0.145956	0	0.0881256	0.140257
0	0	0	0	0	0	0
0	0	0	0	0	0	0
0	0	0	0	0	0	0
0	0	0	0	0	0	0
0.19568	0.190741	0.189561	0.200461	0.193742	0.190755	0.186543
0	0	0	0	0	0	0
0	0	0	0	0	0	0
0	0	0	0	0	0	0
0	0	0	0	0	0	0
0	0	0	0	0	0	0
0	0	0	0	0	0.102335	0.111895
0	0	0	0	0	0	0
0	0	0	0	0	0	0
0	0	0	0	0	0	0
0	0	0	0	0	0	0
0	0	0	0	0	0	0
0	0	0	0	0	0	0
0	0	0	0	0.33916	0.332636	0.34787
0.6804	0.729041	0.74648	0.74677	0.727803	0.726054	0.73312
0	0	0	0	0	0	0
0	0	0	0	0	0	0
0	0	0	0	0	0	0
0	0	0	0	0	0	0
0	0	0	0	0	0	0
0	0	0	0	0	0	0
0	0	0	0	0	0	0
0	0	0	0	0	0	0
0	0	0	0	0	0	0
0	0	0	0	0	0	0
0	0	0	0	0	0	0
0	0	0	0	0	0	0
0	0	0	0	0	0	0
0	0	0.741115	0.784936	0.746612	0.768624	0.808581
0	0	0.762582	0.686814	0.842931	0.900339	0.718033
0	0	0.669231	0.719092	0	0.692174	0.839916
0	0	0.318984	0.322581	0.324665	0.379235	0.40323
0	0	0	0	0	0	0
0	0	0	0	0	0.304146	0.312229
0	0	0	0	0	0.154426	0.15054
0	0	0	0	0	0	0
0	0	0	0	0	0	0
0	0	0	0	0	0	0
0	0.115422	0	0	0	0	0
0	0	0	0	0	0	0
0	0	0	0	0	0	0
0	0	0	0	0	0	0
0.211485	0.187164	0.213398	0.193363	0	0.212837	0
0	0	0	0	0	0	0
0	0.280115	0.261868	0.254322	0.257997	0.262769	0.261963
0.284012	0.487462	0.52121	0.5997	0.583818	0.291204	0.596329
0	0.173193	0.182581	0.185285	0.168039	0.177797	0
0	0	0	0	0	0	0
0.740788	0.775473	0.735132	0.682374	0.744983	0.743924	0.770122
0.879714	0.909198	0.889594	0.899579	0.908241	0.90271	0.904168
0.223674	0.20803	0.224029	0.23044	0.222385	0.221146	0.222291
0	0	0	0	0	0	0
0	0	0	0	0	0	0
0	0	0	0	0	0	0
0	0	0	0	0	0	0
0	0	0	0	0	0	0
0	0	0	0	0	0	0
0	0	0	0	0	0	0
0	0	0	0	0	0	0
0	0	0	0	0	0	0
0	0	0	0	0	0	0
0	0	0	0	0	0	0
0	0	0	0	0	0	0
0.547502	0.592883	0.524484	0.558118	0.531445	0.536492	0.537262
0	0	0	0	0	0	0
0	0	0	0	0	0	0
0	0.59794	0.804751	0.815875	0.417221	0.370109	0.378166
0	0.329295	0	0.427838	0	0	0
0	0	0	0	0	0	0
0	0	0	0	0	0	0
0	0	0	0	0	0	0
0	0	0	0	0	0	0
0	0	0	0	0	0	0
0	0	0	0	0	0	0
0	0	0	0	0	0	0
0	0	0	0	0	0	0
0	0	0	0	0	0	0
0	0	0	0	0	0	0
0	0	0	0	0	0	0
0	0	0	0	0	0	0
0	0	0	0	0	0	0
0	0	0	0	0	0	0
0	0	0	0	0	0	0
0	0	0	0	0	0	0
0	0	0	0	0	0	0
0	0	0	0	0	0	0
0	0	0	0	0	0	0
0	0	0	0	0	0	0
0	0	0	0	0	0	0
0	0	0	0.652174	0.601206	0.532654	0.579157
0	0	0	0	0	0	0
0	0	0	0	0	0	0
0	0	0	0	0	0	0
0	0	0	0	0	0	0
0	0	0	0	0	0	0
0	0	0	0	0	0	0
0	0	0	0	0	0	0
0	0.0778246	0	0.0859942	0.0857993	0.0854019	0.0864306
0	0	0	0	0.116621	0	0.208695
0.0886525	0.336433	0.449508	0.5191	0.430488	0.298659	0.404177
0	0.221719	0.274945	0.419332	0.270317	0.273488	0.271693
0	0	0	0	0	0	0
0	0	0	0	0	0	0
0	0	0	0	0	0	0
0	0	0	0	0	0	0
0	0	0	0	0	0	0
0	0	0	0	0	0	0
0.184656	0.174276	0.179145	0.175323	0.186432	0.182183	0.177278
0	0	0	0	0	0	0
0	0	0	0	0	0	0
0	0	0	0	0	0	0
0.0630685	0.0659996	0.0667991	0.0690123	0.0685805	0.0692201	0.0700093
0.174632	0.199608	0.196036	0.219413	0.197929	0.203407	0.20211
0.102865	0	0	0	0	0	0
0	0	0	0.131157	0	0	0.122734
0	0	0	0	0	0	0
0	0	0	0	0	0	0
0	0	0	0	0	0	0
0	0	0	0	0	0	0
0	0	0	0	0	0	0
0	0	0	0	0	0.0430053	0
0	0	0	0	0.0589559	0	0
0	0.149587	0.199652	0.260119	0.150113	0.208434	0.149538
0	0.135416	0.133414	0.186154	0.141682	0.187909	0.178036
0	0.215725	0.193665	0.255115	0.146046	0.148823	0.142701
0	0.143691	0.166948	0.304837	0.159607	0.234662	0.318887
0	0.156835	0.187064	0.324333	0.252882	0.325172	0.253353
0	0.205862	0.296968	0.295891	0.282898	0.448707	0.381213
0	0.348212	0.372723	0.473498	0.4696	0.610993	0.525703
0	0.166543	0.249037	0.293593	0.243986	0.325686	0.254208
0	0.217594	0.224203	0.3101	0.295438	0.36879	0.384118
0	0.239554	0.444688	0.44188	0.242409	0.322319	0.24246
0	0.229169	0.230846	0.235375	0.236774	0.237767	0.231841
0	0	0	0	0	0	0
0	0	0	0	0	0	0
0.0557449	0	0.0544373	0.0540373	0	0.0505743	0.0504932
0	0	0	0	0	0	0
0	0	0	0	0	0	0
0	0	0	0	0	0	0
0	0	0	0	0	0	0
0.257287	0.271998	0.265408	0.26738	0.258998	0.261255	0.261934
0	0	0	0	0	0	0
0	0.152651	0.129863	0.127981	0.123496	0.124527	0.124779
0	0	0	0	0	0	0
0	0	0	0	0	0	0
0	0	0	0	0	0	0
0	0	0	0	0	0	0
0	0	0.479268	0.469526	0.277072	0.463352	0.441745
0	0.152028	0.591022	0.542378	0.541543	0.580239	0.566228
0	0.156139	0.236662	0.21981	0.208404	0.226571	0.224054
0	0.107174	0.144522	0.145585	0.151334	0.128832	0.151154
0	0.154472	0.423217	0.442877	0.39757	0.652071	0.411787
0	0	0.215124	0.206085	0	0	0
0	0	0	0	0	0	0
0	0	0	0	0	0	0
0	0	0	0	0	0	0
0	0	0	0	0	0	0
0	0	0	0	0	0	0
0	0	0	0	0	0	0
0	0	0	0	0	0	0
0	0	0	0	0	0	0
0	0	0	0	0	0	0
0	0	0	0	0	0	0
0	0	0	0	0	0	0
0.37761	0.682921	0.743573	0.732153	0.750275	0.742687	0.745652
0.262989	0.642873	0.722943	0.72919	0.702314	0.7002	0.717048
0.30267	0.820862	0.857885	0.855931	0.856232	0.824653	0.836262
0.158051	0.573565	0.613955	0.633345	0.601941	0.594933	0.613193
0.14699	0.654762	0.701375	0.804767	0.69118	0.667015	0.672204
0	0.278224	0.29493	0.303603	0	0.282906	0.283473
0	0	0	0	0	0	0
0	0	0	0	0	0	0
0	0	0	0	0	0	0
0.188526	0	0.207555	0	0.203613	0.195368	0.205411
0	0	0	0	0	0	0
0	0	0	0	0	0	0
0	0	0	0	0	0	0
0	0	0	0	0	0	0
0	0	0	0	0	0	0
0	0	0	0	0	0	0
0	0	0	0	0	0	0
0	0	0	0	0	0	0
0	0	0	0	0	0	0
0	0	0	0	0	0	0
0	0	0	0	0	0	0
0	0	0	0	0	0	0
0	0	0	0	0	0	0
0	0	0	0	0	0	0
0	0	0	0	0	0	0
0	0	0	0	0	0	0
0	0	0	0	0	0	0
0	0	0	0	0	0	0
0	0	0	0	0	0	0
0	0	0	0	0	0	0
0	0	0	0	0	0	0
0.844459	0.856538	0.854774	0.837254	0.864497	0.855682	0.86954
0.866667	0.937198	0.873321	0.912443	0.892898	0.917938	0.890558
0	0	0	0	0	0	0
0	0	0	0	0	0	0
0	0	0	0	0	0	0
0	0	0	0	0	0	0
0	0	0	0	0	0	0
0	0	0	0	0	0	0
0	0	0	0	0	0	0
0	0	0	0	0	0	0
0	0	0	0	0	0	0
0	0	0	0	0	0	0
0	0	0	0	0	0	0
0	0	0	0	0	0	0
0	0	0	0	0	0	0
0	0	0	0	0	0	0
0	0	0	0	0	0	0
0	0	0	0	0	0	0
0	0	0	0	0	0	0
0	0	0	0	0	0	0
0	0	0	0	0	0	0
0	0	0	0.55157	0.547238	0.625056	0.564231
0	0	0.593407	0.611916	0.612243	0.596032	0.608808
0	0	0	0	0	0	0
0	0.229542	0.269258	0.445556	0.436962	0.426232	0.420912
0	0.29728	0.293877	0.302571	0.274342	0.3002	0.307177
0	0.782067	0.862372	0.793915	0.666393	0.889173	0.873943
0	0	0.326953	0.311637	0.288673	0.342267	0.349721
0	0	0.115392	0.255696	0.114683	0.301295	0.123921
0	0	0.179581	0.179581	0	0.176235	0.166941
0	0	0.340453	0.318769	0	0.317111	0.376362
0	0	0	0	0.173129	0.168747	0
0.127484	0	0.105639	0.111701	0.102197	0.107942	0.103645
0	0	0	0	0	0	0
0	0.150063	0.190062	0.488052	0.306545	0.479302	0.362373
0	0.260627	0.317428	0.769718	0.527982	0.877868	0.535145
0	0.228513	0.240063	0.433571	0.53716	0.505341	0.52874
0	0	0	0	0	0	0
0	0	0	0	0	0	0.0529752
0	0	0	0	0	0	0
0	0	0	0	0	0	0
0	0	0	0	0	0	0
0.0638996	0	0	0	0	0	0
0	0	0.0714796	0	0	0	0
0	0.0427871	0.0452003	0.0463276	0.0445633	0.0456618	0.0450346
0	0	0	0	0	0	0
0	0	0	0	0.0372305	0	0
0	0	0	0	0	0	0
0	0	0	0	0	0	0
0	0	0	0	0	0	0
0	0	0	0	0	0	0
0	0	0	0	0	0	0
0	0	0	0	0	0	0
0	0	0	0	0	0	0
0	0	0	0	0	0	0
0	0.10046	0.117982	0.115464	0.114574	0.11424	0.110769
0.127126	0.128464	0.128296	0.128886	0.12748	0.129125	0.130983
0	0	0	0	0	0	0
0	0	0	0	0	0	0
0.165565	0.166302	0.169548	0.173812	0.172517	0.184707	0.182092
0.0735527	0.0760333	0.0843322	0.0804159	0.085527	0.0798048	0.0825357
0	0	0	0	0	0	0
0.186461	0.177393	0.17782	0.1764	0.210584	0.204852	0.213282
0	0.220036	0.229189	0.229694	0.209342	0.204782	0.227817
0	0	0.195657	0.192077	0	0	0
0	0	0.259602	0	0	0	0
0	0	0.391921	0.406304	0	0	0
0	0	0	0	0	0	0
0	0	0	0	0	0	0
0	0	0	0	0	0	0
0	0	0	0	0	0	0
0	0	0	0	0	0	0
0	0	0	0	0	0	0.169975
0	0	0	0	0	0	0
0	0	0	0	0.0926441	0.123283	0.117928
0	0	0	0	0	0	0
0	0	0	0	0.0847971	0	0
0	0	0	0	0	0	0
0	0	0	0	0	0	0
0	0	0	0	0	0	0
0	0	0	0	0	0	0
0	0	0	0	0	0	0
0	0	0	0	0	0	0
0	0.373441	0	0	0	0	0
0	0	0	0	0	0	0
0	0	0	0	0	0	0
0	0.131186	0.130537	0.147699	0.142889	0.142815	0.14323
0.26747	0.373427	0.45872	0.444929	0.457355	0.471432	0.483364
0.422663	0.546482	0.550296	0.618452	0.580059	0.564054	0.576232
