# Supplementary material
Source: ML conference proceedings conference paper supplement (https://openreview.net/forum?id=dAYodxl90f)
Supplement: supplementary_material [file attachment]

## Sheet: Sheet1
m2	m3	m4	m8	y5m	y5l	y5x
6.74668	28.0079	86.8648	93.7095	10.8496	20.6421	29.9959
6.02061	27.9329	92.4406	98.8396	9.81006	18.0642	33.211
6.04554	27.6388	88.235	95.3461	9.47143	17.0348	29.8126
5.61752	24.8197	86.0462	95.5642	9.38046	17.5469	29.9258
5.59127	26.5987	87.3611	93.0231	9.625	17.4044	30.0389
5.56129	27.4241	86.7902	93.8103	9.40028	18.0742	29.2468
4.81885	25.1451	83.4705	90.2676	9.73008	16.5989	29.6747
5.16713	25.2235	84.9592	91.7265	9.55467	18.039	28.4165
4.95813	25.8114	82.3227	88.6965	9.84376	16.5885	30.1809
4.99649	25.8283	84.2771	89.6427	9.52315	17.686	29.6808
5.0588	25.7555	83.8178	89.0839	9.80393	17.1786	30.5029
4.848	25.2045	82.9853	92.9268	9.92499	17.5675	30.8816
5.28597	25.8763	82.734	90.9984	10.0527	16.8006	30.0589
5.52261	25.5606	82.8156	89.8681	9.91497	17.6809	30.4971
5.35952	25.726	83.4101	90.7331	9.6894	17.6086	30.3325
5.09362	26.2266	82.9906	90.5916	10.2169	16.9354	29.9649
5.00115	26.3049	81.1736	92.1929	9.91096	17.1097	30.1454
5.05289	25.957	83.2066	92.4012	10.2972	17.5127	30.0358
5.53162	25.7858	82.0083	90.6128	9.975	17.4799	29.5086
4.88267	25.77	82.4887	90.141	9.876	17.0013	29.4618
5.02005	26.4249	83.8485	92.5548	9.82033	17.1745	30.1464
4.66789	26.251	84.1685	91.0058	9.87719	16.9578	30.3425
5.18688	26.4661	84.1668	92.4343	9.97411	17.5946	29.5704
5.09281	26.0063	84.4025	91.9744	9.50417	17.8371	30.5913
4.84835	25.5896	82.8762	91.5151	9.81057	17.7592	29.7199
5.26756	26.3009	82.296	93.6742	10.2862	17.7567	29.4099
5.37723	25.5984	84.0959	89.3526	9.69507	16.8521	30.4125
4.95273	25.7906	82.8173	92.0879	9.41688	17.7972	30.8282
5.37893	25.7483	82.0693	90.5611	9.80002	17.8344	29.9701
4.95893	26.655	83.3831	92.3664	9.56931	17.9398	30.4314
5.24197	25.7422	82.2938	92.0803	10.2191	17.6524	30.4235
5.05966	26.0985	83.3332	91.5255	9.92408	17.0882	29.5915
5.11597	25.7041	83.8522	91.149	10.0922	17.9802	30.0813
4.46315	26.0476	84.1389	92.3737	8.88929	17.6114	28.487
4.96499	26.3685	83.4733	90.6494	9.76536	16.8465	30.4855
5.29073	26.0954	84.1452	91.7544	9.68594	17.8561	29.3545
4.71606	23.5323	84.7962	88.895	9.74028	18.0302	30.2692
5.09489	25.9894	83.0547	90.5237	9.7752	17.6661	29.5441
4.91855	25.7323	83.7358	89.7421	9.75164	17.6575	29.7822
4.89082	26.3741	82.1748	90.821	9.62258	17.2901	30.717
4.86595	25.3143	83.0831	88.9006	9.74498	17.6776	29.7914
4.77806	25.3589	82.9547	91.1803	9.79998	17.8672	30.26
5.11681	26.6761	82.6478	91.3955	10.0126	17.3861	30.1268
5.05838	25.415	82.7166	90.6183	9.82654	17.9549	30.2521
5.10016	21.2152	84.7377	89.9152	10.0555	17.6894	29.9255
4.91723	22.1451	83.9566	92.6153	9.29941	18.1062	29.9778
5.08221	21.0628	83.4172	92.3308	9.44999	17.266	29.0227
4.98425	25.1814	85.3903	93.2952	9.82826	18.0969	30.1385
5.08394	22.3575	83.8801	89.688	10.012	18.1002	30.5226
5.41273	25.2889	81.75	93.41	9.70434	17.8234	30.6815
5.05295	22.2903	83.2793	90.3514	9.71833	18.0611	30.0511
4.82623	25.2092	83.6153	92.1854	9.73867	17.7852	30.2041
5.13692	26.144	82.3852	89.9175	9.99342	17.2907	30.4495
5.15101	26.2009	84.1899	89.4958	9.70994	17.9865	31.0545
5.23298	25.719	83.562	89.063	9.06498	18.3635	29.7948
4.86624	25.8356	84.2612	89.847	9.68256	17.1296	30.5392
4.8722	26.0671	82.6696	89.9379	9.63573	17.0117	29.9672
5.08036	25.7494	82.219	90.5944	9.93696	17.8771	30.1894
4.99679	26.3839	84.1118	88.875	10.1199	18.0285	29.8609
5.31974	25.9571	82.4334	89.7781	10.0733	17.6914	29.7493
5.14933	26.1164	82.8429	92.0431	9.91073	17.3876	30.4245
5.05311	26.3287	82.8007	89.9079	9.73414	17.5087	29.607
4.95817	26.0207	83.5925	91.2964	9.35475	17.9439	30.0348
5.56753	26.9228	85.6321	91.6689	9.95399	17.9731	29.9566
5.37264	26.8186	87.4486	92.446	10.0089	16.2827	29.7674
5.5563	27.4838	86.8564	94.5191	9.82893	17.9912	30.2276
5.33133	26.8066	83.4957	93.9368	9.30962	16.9484	29.9047
5.82722	27.7523	90.6771	99.2319	9.84445	17.3927	29.7124
5.81	27.3667	90.3179	94.6456	9.37272	17.7435	29.5688
5.98623	27.8378	90.3811	97.3149	9.94611	17.5744	29.335
5.71913	28.1188	91.0758	97.8157	10.15	17.2304	29.4025
5.62351	28.0796	92.4059	101.926	9.79884	17.3461	31.0627
6.06231	28.0182	90.013	96.9281	10.0527	16.6962	29.1801
5.26866	28.5061	90.2052	96.9895	9.9526	17.5381	29.2362
5.54827	28.0352	88.479	96.9984	9.7448	18.2671	29.8378
5.63492	29.4492	92.5192	99.4142	9.95335	17.3167	30.8442
5.85883	28.6881	89.8148	96.9786	9.71814	16.9797	29.9979
6.20004	28.4192	88.8628	96.1352	9.58135	18.1289	30.2152
5.98642	28.379	90.6305	97.2474	9.32558	17.4708	30.0873
5.96995	27.5625	90.4437	97.3696	9.16127	18.1663	29.5655
5.94061	29.4082	91.3148	98.133	10.0094	17.4415	30.3629
5.51293	28.0353	90.7878	97.2139	9.62745	17.8936	29.9982
6.03864	27.7115	92.0464	99.3905	10.0256	17.8375	30.0189
5.93157	28.8522	89.3001	100.649	10.0026	17.4838	29.5791
5.90624	26.4449	90.8991	100.069	9.88616	17.6931	29.9932
6.10234	28.0159	89.5976	97.5552	10.0946	17.4032	29.7457
6.37902	28.7338	93.944	98.3255	9.85628	17.6287	30.4459
5.71416	28.6383	93.2845	98.5631	9.95231	17.3092	30.3929
5.92499	28.6351	91.9151	99.6813	9.85768	17.5701	30.0323
5.54994	28.6911	91.9417	98.7449	9.94569	17.9797	30.2109
6.01885	28.4385	93.5212	99.4952	9.87268	17.4889	30.0638
5.7117	28.1667	95.1063	99.72	9.73116	17.4011	30.7686
5.73464	28.4847	92.3501	101.144	9.97635	17.553	30.4379
5.86606	28.326	94.659	101.022	9.57538	16.8807	29.5613
5.96863	28.9904	96.0342	101.224	9.70187	17.7274	29.1882
6.20304	28.5814	91.9738	101.455	10.1396	17.9251	30.3851
5.85574	27.7792	91.7386	99.9976	9.90572	18.0613	30.7266
5.55019	28.8477	90.6472	98.0747	9.90607	17.7754	30.3352
5.75889	27.9175	91.7835	99.8544	10.1831	17.4483	30.7427
5.57684	26.1836	92.2977	98.9702	9.13675	17.5868	29.2405
5.10994	27.6793	91.2396	98.2207	9.55818	18.0316	30.4578
5.68363	25.7112	91.4952	96.893	10.2258	17.9968	29.5772
5.84999	28.6737	91.0243	99.6194	9.86555	17.6753	29.83
5.74648	28.6804	90.0023	100.483	10.1105	17.5202	29.2737
5.62177	28.0489	90.9345	97.2742	9.92542	17.806	29.4208
6.45832	27.495	89.9009	100.674	9.92961	18.0597	30.3228
5.73272	29.7824	91.9049	100.313	9.94127	17.7241	30.0876
5.66674	26.8518	86.424	96.2193	9.67329	17.8165	29.9215
4.7129	21.2731	86.7272	96.7596	10.035	17.8335	29.907
4.87836	25.2072	84.4423	89.6952	9.3346	17.5951	29.5444
5.51473	26.7526	87.8749	94.2489	9.9532	17.8919	30.3802
5.3806	27.3722	86.5749	94.6775	9.42277	17.7408	30.4476
6.00319	25.5801	82.598	88.5355	9.95136	17.6112	29.7855
5.02966	24.8945	82.2419	90.2485	9.79745	17.4902	30.1054
5.10322	26.0993	83.1205	90.6886	9.76674	17.5053	30.1813
4.88286	25.7597	84.0128	88.3819	9.89899	17.7559	29.6936
5.20902	26.2511	82.4115	90.9005	9.49454	16.7746	30.1924
5.5414	27.0014	86.7719	94.7672	9.85436	17.0533	30.1994
5.17338	26.5944	86.8206	94.6299	10.045	17.7502	29.941
5.61774	28.3702	91.7789	98.9933	9.77164	17.856	30.2272
5.82881	28.0357	90.8416	97.7489	9.9702	17.8283	29.2666
5.16296	27.042	91.8527	100.747	10.0079	17.8271	29.9564
5.93315	28.34	90.562	97.7472	9.68882	17.3801	30.6108
5.84656	28.0048	89.341	97.3184	9.62331	17.8663	30.2076
5.81162	27.5342	92.1358	99.9367	9.79992	17.5638	29.6285
5.9682	28.1564	90.2736	96.6577	9.46193	17.5281	29.949
5.35463	27.5404	86.9673	93.8247	9.78323	17.3253	29.897
5.40465	27.7396	85.8362	94.236	9.83238	17.9828	30.6347
4.76064	24.9121	84.0096	89.3504	9.5564	17.6585	29.3604
5.19344	24.8534	83.2067	91.7724	9.88471	17.6407	30.6471
5.18398	23.8423	83.1978	93.7504	10.3137	18.1188	30.7797
4.6732	26.2466	83.3444	89.4863	9.9997	17.0805	29.6297
5.10111	24.8406	85.0289	91.6381	9.77123	16.9523	29.1574
4.63145	26.3279	84.6699	91.2518	9.94002	17.4359	30.3245
5.56511	26.8921	87.3312	93.8875	9.98433	18.2522	30.5058
5.15426	25.3806	84.0424	89.548	9.83687	17.39	30.6741
5.2895	25.1597	84.2773	89.5243	10.3277	17.5067	30.2113
4.92702	24.8237	84.2009	91.5164	9.90412	17.7082	30.6296
5.71645	26.7273	86.8274	93.8001	9.55971	16.9763	30.7988
5.35202	26.1332	85.5919	94.0483	9.29428	17.654	30.355
5.80692	27.6366	90.7457	96.5537	10.007	17.7295	30.3346
5.94032	28.4369	90.672	99.3072	9.87024	17.2555	30.4498
5.30998	27.95	90.7707	100.705	9.90505	17.7849	30.7956
5.91213	28.9543	92.5162	99.3762	10.0405	18.3865	29.6484
6.0234	28.2058	92.6621	98.2147	9.56996	17.8654	30.6568
5.48259	27.0226	85.2029	94.6449	9.55669	17.1631	30.0639
5.68629	26.9284	86.2403	92.0391	9.56734	16.6994	29.3482
5.38851	26.6978	86.7265	92.709	9.95805	17.2192	30.234
5.96995	28.2081	91.8338	99.3793	10.0232	17.2391	30.7365
5.53629	28.0109	91.1273	99.0871	9.93484	17.8141	29.4407
5.37118	27.0805	84.942	93.4185	9.44386	17.4125	29.9409
5.36651	26.8957	86.816	95.3669	9.9443	16.9402	28.8108
6.02922	28.3092	91.0175	98.1424	9.53196	17.4827	30.0804
5.73064	26.081	87.8375	92.5896	10.045	17.8624	29.9031
5.27805	27.6718	87.8611	91.5243	9.8994	17.8233	30.6914
5.54077	26.3673	85.4659	93.6043	9.8783	17.684	30.0165
5.63066	27.1189	86.5286	93.18	9.75917	17.6542	30.1731
5.98085	28.675	90.8735	97.0168	9.72324	17.3543	29.5377
5.97575	28.0049	92.5161	97.2503	9.95024	17.7487	30.1588
5.41785	27.0354	85.1255	92.6426	9.80009	17.4401	28.722
5.58569	26.6051	85.2668	93.7726	9.81192	17.6029	29.785
5.89742	28.6626	91.17	100.194	9.73004	17.4934	30.8837
6.32731	28.0365	90.2178	100.531	9.93824	17.7929	29.3403
5.96864	24.6853	91.0326	97.9878	9.7324	18.0082	29.6959
5.45075	28.4022	90.4534	96.2067	9.81147	17.1565	30.0384
5.8014	28.4876	88.7252	97.6239	9.81418	18.0177	29.4583
5.88718	28.891	92.6076	98.9626	10.1155	17.6481	30.0827
5.86556	28.8607	91.6439	99.792	9.53124	17.5415	29.4021
6.03805	28.525	91.9478	100.6	9.92403	17.4026	29.7934
5.75321	28.7856	90.4211	98.2963	9.77382	17.7989	29.4723
5.65307	27.7885	92.699	98.5749	9.30303	17.7065	29.6082
5.76661	28.4589	90.3247	96.694	9.56862	17.9526	30.0458
5.76086	27.4864	88.9746	96.4807	9.94525	17.64	29.5124
5.60105	24.0086	92.23	98.9555	9.65932	17.7078	30.7786
7.97193	24.8838	92.853	97.1785	9.91236	16.9109	30.7337
5.90958	23.8426	90.632	98.8012	10.3141	17.6203	30.7491
5.66128	26.2238	90.4185	99.5781	9.84408	17.5335	30.308
5.95337	28.472	88.7089	99.138	9.90763	17.1709	29.5793
5.74104	28.3229	91.5423	98.0492	9.82607	17.5823	30.5211
5.82156	26.5401	89.6634	98.5056	10.0063	17.6644	29.5781
5.6873	27.7868	88.0831	97.4256	9.69562	17.3605	28.7029
5.62498	28.1333	90.6099	99.7692	9.43947	18.2907	30.1121
5.77765	27.8611	90.2306	100.11	9.38689	17.6935	29.9451
6.21869	28.0941	88.223	96.7644	9.69627	17.7619	29.9285
5.5092	28.424	90.014	99.3741	9.82168	17.1658	29.829
5.54829	27.811	89.2004	96.9593	9.77714	16.975	29.9489
5.75469	28.5549	92.5932	98.5121	9.54781	17.026	30.3671
5.70462	28.1132	90.9171	97.1319	9.80051	17.6424	30.1778
5.899	27.8569	90.0621	98.1879	9.96234	17.286	30.4534
6.27664	24.4722	92.3602	99.6972	10.0087	17.7205	29.9972
5.63685	28.4697	91.4886	99.6933	9.99797	17.8119	29.6946
5.54887	26.1178	92.3115	99.2858	9.8713	17.8247	29.8956
5.32218	28.0836	90.4886	98.3469	10.1964	17.2943	28.7687
6.02606	28.9011	90.0576	99.7119	9.95768	17.8417	29.4935
5.79644	26.7317	90.0599	98.878	9.95787	17.6249	29.7816
5.7634	24.9357	90.1951	100.696	9.85803	17.6674	29.3098
5.60889	28.6927	91.165	100.015	9.5457	17.4179	30.1136
5.60463	28.2093	93.0183	102.14	10.3948	18.0634	29.5251
5.90726	28.967	88.4772	97.889	9.00423	17.5644	30.9207
6.26185	27.4352	91.5839	98.8734	10.0717	17.383	30.6016
5.75012	27.9181	91.7444	100.688	9.72283	17.8755	30.0808
5.75552	27.2212	91.6554	101.194	8.95813	18.0068	30.5411
5.74746	29.0732	91.3333	99.6636	10.2622	18.7692	30.8907
6.04491	27.5551	91.484	97.246	9.97204	17.5082	29.9838
5.62759	28.3981	92.3961	101.236	9.85556	17.7299	29.5852
5.77692	28.3577	89.3591	99.2911	10.0036	17.7748	31.0266
5.58931	27.2317	90.9901	98.642	9.82719	17.9489	30.1799
5.6623	25.246	91.9542	97.5919	10.1125	17.7806	29.222
5.99869	28.7193	91.8722	98.8378	9.50867	17.7811	29.2886
5.9001	25.2332	89.2937	97.7415	10.0195	17.8166	29.3616
5.7228	26.52	90.8048	98.6142	9.75143	17.6298	30.2335
5.46911	25.7994	92.1085	98.7473	9.94001	17.8228	29.8166
5.78465	28.3938	90.279	98.9647	8.61195	17.6563	30.8197
5.58293	28.2291	90.2841	98.7403	10.0799	17.8669	28.9259
6.05646	27.8241	91.0309	96.7515	9.8961	17.6406	29.5671
5.8628	28.1415	89.5092	97.7473	9.19602	17.2613	30.4225
5.61823	27.4804	90.9555	98.9827	9.47488	17.8065	30.3954
5.6187	27.8027	90.1596	98.0057	9.51157	17.8481	30.9437
5.96716	28.7903	90.5683	99.3925	10.0429	17.9353	29.9292
6.00315	28.1842	89.6608	97.8855	9.99645	17.6872	30.2635
5.97087	28.3736	91.4777	98.1467	9.87373	17.4823	29.477
5.85399	28.4372	90.2403	98.5812	9.5937	18.12	29.645
6.0541	26.2555	86.4787	93.7553	9.91312	17.6341	29.4865
6.07915	28.1804	89.3535	97.6402	9.73142	17.8481	30.2268
5.78293	27.2853	91.5854	96.2139	9.70454	17.7891	28.9707
5.90788	28.1479	88.0075	98.5389	9.83509	17.155	29.9887
5.5483	27.986	91.6544	95.9198	9.06007	18.0409	30.7503
5.57463	27.683	91.0003	98.1394	9.78593	17.9779	30.3586
6.03809	27.7418	90.8875	99.6591	9.48874	17.7332	29.6905
5.65304	28.412	91.6861	98.4704	9.85942	17.9426	29.3198
5.56885	28.0315	92.1558	97.8931	9.92716	16.8858	29.5314
5.67121	28.0401	90.8031	97.9661	9.85755	17.2652	30.3278
5.90477	28.1375	89.0613	98.6142	10.1279	17.4081	30.2929
6.08239	28.0557	91.6621	99.1875	9.36591	17.7386	31.0556
5.86846	28.0976	90.5914	98.2707	9.80007	17.397	30.6051
5.9862	28.2722	90.8479	97.8153	9.76834	17.2814	30.3899
5.98926	27.384	92.4739	96.3384	9.91281	17.529	31.2495
6.17003	28.2035	92.1419	97.2187	9.87004	17.0804	29.8993
5.79293	24.7654	91.6333	100.542	9.80267	17.8895	30.0385
5.48798	27.3218	87.3421	93.2649	10.045	17.3714	30.4129
5.5953	27.2571	86.4549	94.2788	9.35085	17.7317	30.4751
5.27823	26.3963	87.275	94.6912	10.1396	16.6335	30.0247
5.17607	24.1908	81.9688	90.5386	10.1493	17.9093	30.2668
5.33638	26.8005	86.9362	93.6714	9.57458	17.908	30.8212
4.81283	25.0978	80.9634	90.4151	9.60878	18.0248	29.9608
4.99741	24.3761	87.9001	93.0301	9.88183	18.0033	29.9645
5.13808	23.6383	83.2237	91.8966	9.42443	17.7215	28.9921
4.88317	25.7595	84.1269	90.5446	9.70074	17.2253	31.074
5.02129	25.3521	83.3458	90.4254	10.0459	17.9228	29.2806
5.08537	26.4874	85.1274	88.846	10.0956	18.0598	30.1358
6.19593	28.3458	91.813	99.144	9.31358	17.9941	29.3835
5.95508	28.7342	89.7021	98.9654	9.83322	17.4661	29.7219
5.80814	28.0958	93.4018	99.9812	10.4681	17.4575	29.3152
6.01689	28.4239	89.974	98.9382	9.88785	17.7494	29.6928
5.79963	28.8481	90.0629	98.8307	9.73214	17.1421	30.3814
5.85044	27.5059	89.9455	97.881	9.45	17.4952	29.9894
6.11623	27.4947	90.1828	97.6913	9.97495	17.6494	30.4987
5.75811	28.1325	89.1955	98.2925	9.94005	17.7744	30.3507
6.0031	28.3834	90.9794	99.7787	9.55536	17.8582	29.6313
6.02084	28.003	90.0819	99.491	9.979	17.4336	29.638
5.90189	27.4844	91.6084	98.3789	9.85194	17.6312	30.3831
5.90033	27.6123	89.6104	99.9388	9.70274	17.7196	29.9294
5.60747	27.1633	87.7671	92.4758	9.38611	17.2607	30.1413
5.68469	27.5379	90.339	97.9779	9.65526	17.7846	28.5965
5.75847	28.0812	90.7317	97.0628	9.5955	19.3126	29.125
5.52653	27.5924	90.0254	100.536	10.1583	17.8405	29.9972
4.89449	22.3433	87.1536	95.3757	10.3716	17.1114	30.1436
4.81133	26.8375	81.9366	89.5132	9.68413	17.9539	29.7246
4.98782	26.456	84.3019	87.2657	9.15616	17.2409	30.1511
4.83936	25.6712	84.5668	92.6284	9.76497	17.381	29.8337
5.77286	26.4783	85.2286	95.6504	9.65086	17.5768	30.3979
5.47148	26.5125	87.4911	93.1338	9.86712	17.1259	29.9075
4.75165	25.5503	82.661	89.9315	9.93996	17.4502	29.7667
5.53592	26.4643	87.7876	95.2264	9.83047	17.1379	30.724
5.70066	26.8798	86.6832	93.1002	9.81151	17.2588	31.0723
6.09849	28.8747	91.4136	97.5124	10.1505	17.6618	31.4925
5.91568	28.2378	89.6871	99.1247	9.94901	18.1833	29.9507
5.69338	28.2239	91.2976	98.4314	9.89292	17.6118	30.4183
5.769	26.9685	90.0752	99.0681	9.87994	17.4656	30.6511
5.84586	28.1663	91.0274	95.14	9.62526	17.7451	30.0101
5.8884	27.661	90.7064	96.3957	9.94009	17.9136	29.7665
5.93344	28.4649	91.0807	96.8033	10.6278	17.3867	30.2237
5.84574	27.4895	90.2735	98.7526	9.9951	17.7455	30.1698
5.90607	28.236	91.2607	99.3497	9.94714	17.9306	31.1124
6.35235	27.8762	90.9386	100.872	10.0968	18.289	30.8145
5.8529	27.9562	91.9957	99.9528	9.69481	18.5689	31.4569
5.65368	28.1765	90.7469	98.1649	9.34506	17.5586	30.0261
5.97453	27.6013	90.5503	100.186	9.78293	17.9607	30.7481
6.15055	28.4874	90.4193	97.59	9.91365	17.5459	30.0501
5.65014	28.4441	89.8886	98.6533	9.23637	18.271	30.7004
5.79443	28.0656	91.7514	99.4546	9.89093	17.3698	30.3921
5.57505	29.2593	91.0448	98.5837	9.97704	17.7941	30.4744
6.06792	27.9102	92.4258	96.7203	9.80001	17.3601	30.0489
5.50784	27.447	92.0366	99.182	9.53051	17.4703	30.6302
5.70621	28.6151	92.571	96.6295	10.2067	17.7818	30.589
5.93294	28.2842	90.0432	98.3851	9.89457	17.4192	29.9688
5.55671	28.4268	89.6812	98.6609	9.85611	17.988	29.8275
6.14326	28.005	91.0893	99.1029	9.77157	17.3158	29.9891
5.97135	28.5566	92.6875	98.2674	9.84447	18.1503	29.8402
5.81819	28.0036	91.3511	98.5246	10.0773	18.0839	30.8892
6.17336	28.6914	90.5561	98.9192	10.0752	17.2103	30.5754
5.54129	27.8938	93.0042	100.249	9.91269	18.3713	30.72
5.96799	28.4674	90.6032	100.999	9.94001	17.8046	30.5345
5.75164	28.3028	92.6185	99.4247	9.88104	17.6007	30.398
5.67884	28.4433	92.8812	99.735	9.62535	18.8132	30.1964
6.44698	28.5614	90.4028	96.9172	10.0215	17.835	30.3773
5.716	21.5914	86.6148	93.0212	10.3931	18.3444	31.8579
5.38603	19.4569	86.8478	94.2694	9.58888	17.1908	30.5723
5.26908	19.1814	87.7264	93.1216	9.69854	17.8672	30.5365
5.10665	21.9001	86.2519	93.2435	9.91929	18.4704	30.0652
5.00372	18.8348	84.3931	94.2149	9.71738	17.8833	31.2333
5.04065	17.232	83.3756	91.9999	9.77164	17.7295	30.0975
5.13634	16.0741	86.1354	92.8952	9.94228	17.5674	31.0119
4.7855	19.1568	84.0611	93.6057	9.88491	18.4924	30.7119
5.03817	18.4956	83.8264	93.4335	9.93134	17.9954	30.3691
5.81554	22.6822	87.3251	96.2414	9.68068	17.8254	30.501
5.11217	18.7477	88.5465	95.1082	9.87946	17.1861	30.6602
5.47577	24.3894	88.2116	95.2317	9.31003	17.7089	30.2117
5.46292	18.6545	86.9366	94.7167	9.50113	17.6013	30.1739
5.52417	18.6063	89.8101	96.4733	9.84508	18.1238	30.2483
5.38248	23.551	87.357	97.9205	9.63843	17.4423	30.9702
5.00971	21.4466	88.3361	95.3395	9.87042	17.4033	30.6474
5.03916	23.8358	89.0577	94.7963	10.1149	17.3299	30.7217
4.62025	19.8436	88.8403	98.5564	9.8701	18.1889	31.415
5.29609	18.7031	88.2356	98.1325	9.79222	17.7571	30.5742
5.28316	18.4953	85.6708	94.2692	9.60792	17.6168	30.1203
5.13124	26.4801	84.1009	89.3828	10.0112	17.6463	30.8173
5.02204	26.2187	85.1555	91.1328	9.92645	17.6278	30.5029
5.28783	26.3798	88.7764	93.867	9.62175	17.4713	30.8126
5.6297	26.9612	85.9328	92.9198	9.83478	17.9541	30.3256
5.72808	26.7102	85.673	93.3749	9.57788	16.8559	29.4395
5.53199	25.7473	87.7584	94.623	11.1177	17.0718	30.3578
5.47715	26.8126	86.8725	95.4725	9.29693	17.426	30.7436
4.93932	26.1635	83.9517	89.3086	9.66007	16.8067	29.9136
5.70943	27.2325	87.0378	94.7675	9.71078	17.1058	30.5983
4.99048	26.0219	82.1812	91.2099	9.80423	17.3398	30.9889
5.13043	25.7699	84.4185	89.1975	9.76506	16.933	30.4349
5.25468	26.2611	82.2536	94.0838	9.37732	17.71	30.0726
5.02431	26.2905	82.0464	88.0754	9.84663	17.5603	30.4097
5.4361	24.1345	87.6806	94.7802	9.69259	18.0516	30.0108
5.57245	26.1353	86.2004	95.0653	10.01	17.4766	30.2704
5.43953	27.5889	86.4498	94.3898	10.1176	17.6235	30.2717
5.39365	24.1602	86.3041	95.6133	9.80741	17.6392	31.1006
5.75985	26.8369	85.4578	93.4914	9.83485	17.3633	30.278
5.24593	27.6366	86.7766	93.768	9.81303	18.0592	30.6996
5.28815	26.5037	86.5316	93.0091	9.81694	17.4225	29.5056
5.53805	26.5059	87.3454	93.0898	10.053	18.5406	30.9055
5.19885	26.4857	87.6888	94.9279	10.1239	17.7381	30.5046
5.63499	27.1748	85.9909	93.4875	9.94147	17.7656	31.3993
4.98853	25.7113	82.9444	90.5844	9.81621	17.4846	28.8178
4.93079	26.0261	82.8107	90.1878	9.85566	17.8386	29.9514
4.88996	26.1863	83.416	90.0268	10.2316	17.6211	30.7591
5.02306	24.149	82.9973	88.1248	9.97502	17.7939	28.9956
4.61876	20.2626	82.6974	89.0556	9.54762	18.1661	29.4517
4.98361	20.7853	84.7527	88.325	9.86683	18.1615	30.4655
5.15516	20.9821	83.249	89.2018	9.81663	17.955	29.7641
5.55542	19.5445	85.0301	90.9965	9.60984	17.1368	30.3218
4.93629	17.6491	84.5021	88.6514	10.4624	18.1267	30.6708
5.02681	18.2776	84.2979	88.3617	9.94141	17.8526	31.4648
4.95304	18.6523	83.6475	89.6822	9.84813	18.2856	30.7399
4.98784	20.6868	84.2566	90.5794	9.6142	18.377	30.8149
4.77461	17.1942	83.0247	88.6102	8.81612	17.4657	29.6187
4.89842	17.8609	83.096	92.5819	9.81162	17.9307	29.9203
4.95737	20.0263	83.8068	90.5478	9.59792	17.6318	30.4598
5.0789	20.4949	86.7643	92.0731	9.78734	18.0859	30.3527
5.42934	21.5218	85.1896	92.7341	9.89918	18.0021	30.6905
5.10992	21.1744	83.9431	92.943	9.68473	17.8172	30.7152
5.23708	22.7116	83.8686	91.3323	9.75577	17.2194	30.6075
5.47719	22.8013	88.3087	94.6259	10.0511	18.0445	29.7865
5.21733	22.2953	89.2625	96.4308	9.53089	17.5731	31.1989
5.13774	23.0747	86.0125	95.5522	9.92558	18.039	31.4531
5.32154	23.3855	86.3724	93.4691	9.73229	18.0294	30.338
5.56299	23.5114	88.387	95.0605	10.115	18.4009	29.6345
5.35877	24.3425	88.776	97.0085	9.81317	18.616	30.0276
5.7619	23.0515	87.5872	94.0409	10.0839	17.1586	31.1716
5.38278	22.9187	88.6126	95.0011	9.64278	18.2473	30.3811
5.29141	25.7018	85.4332	90.3873	9.7965	17.3369	29.6923
5.20443	22.3223	84.9133	89.9935	9.81901	17.1584	30.9547
5.49345	23.2094	88.1647	95.85	9.92822	18.2374	31.0663
5.24249	23.2061	82.4503	90.5729	9.69522	17.5647	30.8056
4.6728	21.3221	83.5142	91.8049	9.54963	18.0814	30.933
5.19281	25.7127	85.7499	91.2118	10.1866	18.1282	30.564
5.04981	23.7716	85.9409	90.137	9.94008	18.2104	29.5989
4.7305	24.0817	82.3998	90.1148	9.91203	17.7552	29.2603
5.11444	25.9248	84.2603	89.5383	9.93653	17.5352	30.0514
5.00488	21.3402	82.6915	89.5702	10.0052	18.1746	29.6852
4.84641	22.902	83.5625	90.1016	9.84544	16.9579	30.2421
5.12868	25.6428	83.5288	91.3522	9.87728	17.3251	30.6934
5.22979	21.2733	83.2299	91.2656	9.76796	18.176	29.7775
5.1283	23.1321	85.9101	91.709	9.8807	18.5445	31.0273
5.00553	22.0897	83.0134	91.321	9.94884	18.2559	31.0734
5.34236	25.9905	82.8762	92.5272	10.1903	17.2087	29.4181
4.70533	26.5108	84.9455	90.1901	10.0816	17.4584	31.0038
4.89552	26.0065	84.5935	89.4743	9.71714	17.3357	30.1203
4.74275	25.5332	84.9253	91.0464	10.108	17.421	29.4418
5.22669	24.7229	83.5671	90.036	10.1904	17.753	31.3362
5.59044	24.3713	84.9912	92.6055	9.89439	17.1639	30.3795
5.35388	25.7002	83.4713	88.5401	10.1049	19.3033	30.9031
5.05391	25.4953	83.5036	91.606	9.83413	17.9283	30.4156
5.01755	26.7019	83.3473	89.2227	10.356	17.5633	30.5373
5.13119	26.18	84.3514	90.2018	9.48068	17.3987	30.7695
4.95295	25.1112	82.3867	89.1795	10.0449	17.1896	30.6396
5.09692	26.0349	84.6045	89.4156	9.49465	17.7703	30.5837
4.98787	24.9053	82.3352	90.2307	9.9302	17.1021	30.4449
4.94652	26.1374	82.669	90.3797	9.9065	18.4466	30.0132
4.99799	25.0297	84.3212	91.2987	10.0991	17.2514	30.17
5.19086	24.7594	81.9338	88.7549	9.73024	18.5555	30.5551
4.91822	26.2114	81.9604	88.867	10.0579	17.8857	30.6444
4.98817	25.7018	83.1663	89.857	9.94303	17.9429	29.2807
5.32058	24.9297	83.903	89.4534	10.0129	17.2407	29.9967
4.90964	21.1847	83.8077	91.8123	10.1259	17.7417	31.1637
4.53374	20.5356	82.614	89.0496	9.63951	17.4142	30.3962
5.48636	26.2932	86.6136	93.2717	10.025	17.9577	30.4416
5.57896	27.6593	87.7774	93.3429	10.1033	17.5544	29.988
4.86083	25.2453	83.5182	91.0829	10.1084	16.9477	29.9768
5.47588	24.8063	85.2043	94.2128	9.81343	17.4551	29.4271
5.30862	24.1384	88.7172	94.0446	9.8833	18.0242	30.4728
5.51239	26.4236	85.7844	94.2681	10.026	17.6875	30.8523
5.49637	25.1763	88.3764	94.301	9.88198	17.8289	29.3082
5.1352	24.0324	85.1833	89.5838	9.80926	17.3814	29.8964
4.74691	22.6894	83.475	89.9104	9.81062	18.0468	28.6325
5.3656	25.4269	81.2913	89.7867	9.93475	18.015	29.3322
5.2219	25.6128	84.1022	90.0597	10.0176	17.9846	30.7569
5.37302	26.1343	82.9418	91.0217	9.93201	17.9051	30.0411
4.95578	25.4921	82.5266	91.3789	10.1771	18.2603	29.8413
5.44225	22.651	84.3191	91.4635	9.93234	17.2334	30.6175
5.0901	25.7919	83.417	91.0866	9.95793	18.2533	29.7071
5.16516	26.0382	83.6803	90.714	9.83892	17.1843	29.6896
5.28446	23.4265	84.3251	93.3688	10.122	18.2112	29.8317
4.78956	25.4456	83.4043	91.8787	9.86932	17.9044	30.4865
4.81309	25.847	83.3578	90.4391	9.55806	17.8189	30.1362
5.17235	25.5792	81.2952	89.9523	9.11843	17.8473	31.1953
4.64202	25.624	82.8264	90.819	10.0615	17.4665	30.1482
5.42437	26.2299	85.1191	92.4564	10.1325	17.36	30.3891
5.24557	26.683	84.0727	90.1467	9.77261	17.8694	30.387
5.35691	26.5651	82.1893	89.3504	9.37495	16.9645	29.9751
4.96391	25.1404	82.6989	90.3699	9.21179	17.1406	30.9938
5.0614	25.8968	83.9103	91.1923	9.90374	17.2926	30.2692
5.37298	25.623	83.5789	93.9557	9.76723	17.6452	30.5285
4.61198	25.7185	83.3912	92.1823	9.74309	17.4227	29.3937
5.03061	26.4867	84.5855	90.569	9.87982	17.7865	29.9176
5.30879	25.3484	83.8744	89.3545	9.90961	17.5242	30.4354
5.16638	23.863	84.3831	90.5351	9.36281	17.9027	30.2037
5.10991	20.9043	86.2615	92.3947	9.83802	18.1137	30.6387
4.92393	24.6545	83.6484	90.2225	9.87067	17.8636	29.6236
4.90658	25.7506	83.2334	88.5094	9.62496	17.785	30.3319
5.21796	26.5631	81.3019	89.4597	9.90566	18.5936	30.4097
5.01953	21.522	83.5486	90.5379	9.85525	18.2381	29.6691
5.00949	23.1349	84.4816	90.2464	10.3255	17.8766	29.972
4.97095	24.7565	84.3147	88.9679	9.87135	17.821	30.7501
5.09416	21.02	83.2804	91.6993	10.0959	18.0289	29.8277
4.98449	22.6234	84.7603	90.3381	9.83501	17.8326	30.9545
5.39814	25.6024	83.1705	91.7163	9.92662	18.0936	31.1777
5.17378	25.6563	84.0087	90.4049	9.91158	18.2636	30.6561
4.88752	25.5521	83.1056	91.7619	10.0055	17.7933	30.2072
5.38376	27.2053	89.6484	94.9659	9.56912	17.1771	30.6235
5.34629	26.973	86.8699	92.0197	10.4258	17.8888	29.7468
5.27629	24.8305	85.9189	88.9057	9.62506	18.0656	29.7731
4.90786	25.6643	81.6195	90.5888	10.0271	17.3435	30.6148
4.99272	25.6579	82.1657	90.147	9.56446	17.9997	30.1929
4.92643	26.296	82.7818	92.4034	9.61073	17.8119	30.4425
5.29942	25.6426	83.6739	91.1636	9.9228	17.6967	30.6204
4.91495	24.8221	83.2373	90.2239	9.69124	17.9526	28.6238
5.07037	25.2978	84.1485	89.2799	10.0029	18.1318	29.5067
5.06868	26.4877	81.9226	90.3599	9.77646	17.045	30.8487
5.35046	24.7618	84.001	90.7531	9.95453	17.4159	30.2905
5.19651	25.2419	84.8913	89.5867	9.85782	17.713	31.1259
5.23416	26.9143	86.6881	95.5643	9.75568	17.7842	30.8909
5.56082	25.3622	88.3669	93.2588	10.1441	16.9228	29.7013
5.2431	23.7258	87.298	93.6624	9.92825	17.7698	29.9877
5.44185	26.359	85.1075	93.5454	10.1685	17.2608	30.1873
5.47277	23.161	88.5134	94.8633	9.63356	18.222	29.9977
5.4381	25.9008	88.4762	92.6331	10.034	17.8004	30.9469
5.69007	26.4746	87.5739	94.0051	9.79643	17.3037	30.1134
5.40696	25.9669	86.9728	95.3635	9.83829	17.4136	29.6083
5.07193	26.1984	86.9949	93.1473	9.07302	17.9611	29.7648
4.44381	25.8131	82.4673	89.3533	9.9173	18.239	29.8555
5.00778	26.9697	85.1334	90.6511	9.6481	17.2805	29.5831
5.32111	26.2044	83.0908	90.5269	9.38739	18.0026	29.7493
5.68211	26.4476	87.0591	94.0668	10.3356	18.2731	29.403
5.72225	27.4669	87.7869	91.5166	9.46556	18.1683	29.7708
6.44835	23.464	87.0233	95.0875	10.4167	17.8399	30.7558
5.16638	25.6923	87.7922	94.9696	10.1821	17.8018	29.9119
5.42398	27.6252	88.4395	94.2357	9.94002	17.7953	30.9722
5.57229	27.5122	88.7032	95.144	9.93451	17.3338	31.0001
5.30981	27.3374	85.6306	94.8601	10.1188	17.3959	30.6091
5.40667	27.3611	88.5812	95.4298	9.77475	18.333	30.1169
5.30742	26.9615	84.3905	88.8942	9.92262	17.9155	30.7762
5.06973	26.6374	86.0353	94.6597	9.86476	17.6472	29.9673
5.07578	27.2036	84.2944	93.1671	9.77709	17.99	29.5037
5.1264	25.9632	82.8099	92.8619	10.3387	17.9537	31.1413
4.94467	26.175	84.5993	90.4964	10.0842	17.7667	29.9504
5.13713	25.1032	83.9734	89.1229	10.0503	17.4671	31.1308
4.98321	25.6152	84.8378	91.7635	10.3124	18.1002	29.3838
5.51155	26.433	84.7544	91.277	10.0142	17.8832	30.18
4.62119	26.0039	82.8325	90.4816	9.57934	17.8699	30.5711
4.86789	25.8034	83.9885	90.9359	9.76884	18.3182	30.244
5.08275	25.9015	84.045	89.7718	9.72995	18.1746	30.5579
5.00208	26.8076	83.0941	89.2059	9.67551	17.7875	30.0145
5.16747	25.3348	83.5069	90.6573	10.2124	17.5403	30.5172
5.17517	26.2921	83.2982	90.0076	9.82073	16.7513	30.0433
4.95073	25.9177	82.108	89.4603	9.7915	17.2395	29.2655
4.82001	25.7042	83.5361	92.7777	10.0268	17.7238	30.2344
5.01441	25.8516	83.9721	90.0819	9.92741	17.4149	30.3771
4.74305	26.0806	83.7822	88.2833	9.79269	17.7498	30.5246
5.43812	26.7106	83.0214	92.135	9.4592	17.9145	29.4882
5.16678	27.2278	82.9015	89.8202	9.24361	17.502	30.8298
4.88303	25.6915	83.341	91.8328	10.0906	16.9069	30.0287
4.84178	26.1628	83.0983	90.6078	9.70185	17.6162	30.5757
4.78244	25.337	82.1798	92.2034	9.80516	18.012	30.1878
5.11809	26.6832	83.2709	89.4827	9.78415	17.1847	30.5671
5.0879	26.2258	82.9039	91.6648	9.73617	17.3544	29.8954
5.26893	26.138	83.1286	91.5863	9.94263	17.983	30.2859
4.89512	24.6997	83.1475	89.9724	9.36352	17.6353	31.6368
4.95279	25.5817	83.9313	90.6111	9.75057	17.6768	30.8381
4.95488	26.2688	83.9738	92.7621	9.71331	18.4826	30.1215
5.19854	25.7539	82.605	90.7614	9.71518	16.8183	29.3469
5.04034	25.5939	83.1723	90.6113	9.34552	17.1275	29.9966
5.14601	23.6991	84.661	90.4566	9.74687	17.5269	30.6987
6.02677	25.5097	83.8502	89.8052	9.87523	17.2387	30.4418
4.88134	25.944	84.2117	87.3589	9.66954	17.3947	30.9035
5.04125	25.5916	83.0106	89.8571	10.0253	17.8364	29.6452
4.47802	25.0815	84.2541	91.8879	9.78418	17.5448	31.063
5.07569	25.6656	82.2413	91.1654	10.1101	17.976	29.7992
5.02515	26.0306	82.3051	91.9346	9.695	17.56	30.0789
5.36969	26.2182	84.8869	88.8608	9.94312	17.8316	30.1555
5.089	26.4526	85.1792	91.5411	9.85863	18.0112	30.6954
5.20413	26.201	85.3786	95.1464	9.73871	18.1883	31.3771
4.59608	26.8145	85.0701	92.2748	9.66976	18.0322	28.9936
5.11914	26.2633	82.8883	92.3929	9.85496	18.1215	31.051
5.02753	26.7459	84.6965	90.9607	9.93306	17.5727	30.503
4.9757	26.4979	85.9532	92.3109	10.1365	17.8946	30.4495
5.02594	26.0475	84.6301	94.1719	9.45224	17.7147	31.235
5.19126	26.5926	86.0468	93.942	9.9507	17.7752	31.2736
4.96138	25.693	85.1021	93.0857	9.97053	17.9549	31.2906
5.91622	26.1377	83.8237	94.1214	10.1883	17.4519	30.5878
5.14979	25.7555	84.0887	93.8334	9.88801	18.5376	29.6253
5.19803	25.091	83.6693	91.609	9.99671	17.4857	31.3093
5.33618	25.9179	85.7293	89.0533	9.66002	18.0459	30.6748
5.11698	25.1585	84.1121	93.8165	9.91129	17.9561	30.2333
5.53704	26.0451	81.879	93.9465	9.89827	18.1793	30.7306
5.1373	24.8609	84.145	93.2399	9.79924	18.18	29.7915
4.81104	20.4995	85.5004	91.3596	10.5265	17.8086	30.5253
5.17573	26.0651	85.5134	90.5126	10.299	17.6519	30.4906
5.04892	26.3415	84.9707	88.5711	10.5198	17.8724	29.291
5.13113	25.2837	83.9913	90.4673	9.97519	18.1335	30.6833
5.09322	23.3857	84.0708	89.6285	10.2245	17.9541	30.7644
5.05449	25.9808	83.9286	90.394	9.84372	17.7774	30.075
5.10512	22.6278	84.9048	88.3568	9.73071	18.2621	30.4744
5.1888	23.3714	81.141	91.0025	9.59476	17.9808	30.3526
5.30027	22.7626	86.1922	89.2448	9.93995	18.4962	30.8196
5.15194	25.7434	85.3087	89.8601	9.97205	18.0536	29.5729
4.94582	25.4856	83.697	89.9129	9.78705	17.5872	30.5991
4.85988	24.6211	84.1242	89.9219	9.62499	17.8902	31.4793
5.51035	26.0827	83.8134	88.7559	9.69537	18.0147	28.465
5.39208	25.5923	88.1436	92.2773	9.69415	18.3488	30.8836
5.211	23.5338	87.2782	94.2151	10.0964	17.1036	30.1332
5.64686	24.2408	91.0949	98.1392	10.072	17.9423	30.4103
5.70755	26.6778	90.6577	98.6345	9.49529	17.9258	31.5261
5.93282	23.7227	91.8821	98.168	10.1647	17.6407	30.019
5.79352	22.7461	92.7945	99.4324	9.94071	18.0854	30.806
6.0572	23.9678	94.5034	98.4487	10.0769	17.9152	30.2918
5.55207	22.455	90.0554	96.6986	10.1727	18.1528	30.3437
5.89816	23.2994	93.6148	98.6352	9.66469	17.6451	30.5987
5.59853	23.0676	86.5686	94.7877	9.66667	16.4728	31.255
5.03978	25.0701	89.0728	96.0529	9.61705	17.9998	30.282
5.85296	24.3806	91.3698	96.8656	10.2977	17.6757	30.7109
5.56678	22.7447	89.8115	94.0105	10.089	17.9735	31.1222
5.39314	23.5702	88.5024	94.9292	10.1143	17.3981	30.6806
5.94513	25.4857	89.2552	92.5387	9.95609	17.8548	30.4969
5.46586	26.5853	86.8931	94.1	10.1648	17.4693	29.9705
5.8359	26.7544	87.0641	93.2731	9.8837	18.0252	30.069
5.43784	26.8519	86.8619	93.3009	10.056	17.2598	30.0651
5.82719	29.0276	91.3371	97.4744	9.46602	17.325	30.031
5.97408	27.691	90.2955	97.4202	9.8409	17.9202	29.918
5.99044	29.7165	89.2073	97.6369	10.6934	17.4893	29.5835
5.86705	28.1976	91.7452	97.0755	8.94053	17.8391	29.6811
5.68718	27.0762	90.6538	97.6925	9.69634	17.3154	29.6503
5.31482	26.757	87.3148	93.858	10.0645	17.6889	30.2402
5.348	27.2329	86.9443	94.4666	9.80264	18.13	29.3344
4.9485	26.1078	86.735	92.6585	10.0777	17.442	29.6095
5.18067	25.0277	82.765	88.7158	9.78282	17.3765	29.97
4.95493	26.2943	82.0816	88.5848	10.1172	17.8262	30.4114
4.90607	25.3164	82.5187	90.2479	9.78464	17.0547	29.8349
5.21059	26.3208	81.8916	89.7416	10.1453	17.9178	30.6221
5.25768	25.5865	82.7247	90.1626	9.83147	17.885	30.5789
5.06457	25.9544	82.5659	88.3224	9.99908	17.4548	30.0467
5.23576	26.1384	83.3911	88.8994	9.63488	17.6253	30.6757
4.90186	25.3192	83.1832	90.3359	9.94818	17.2362	28.5974
4.92663	25.8261	83.4103	88.3887	9.46695	17.4375	30.4348
4.44502	26.1187	83.4597	89.1126	9.99936	18.8726	30.3731
4.85181	25.1583	83.7921	90.5793	10.1627	17.9089	30.6279
5.15113	26.3784	85.2546	90.381	10.3882	17.4304	30.8687
4.97251	26.2951	83.376	89.6412	10.0679	18.0651	30.7652
4.88178	22.4753	83.0992	88.9021	9.91891	18.1033	30.2755
5.11182	21.1779	84.775	90.1774	9.99487	17.7201	30.8547
4.95894	22.7517	85.0227	92.7424	9.12698	17.4144	30.262
4.884	25.3356	83.3831	90.0415	10.1041	16.5557	29.8962
4.81306	24.582	83.294	89.7707	9.62587	17.4168	30.6686
4.75407	21.9201	84.5576	89.5899	9.80012	17.5906	30.571
5.36493	23.7424	88.6586	95.6863	9.89539	17.6742	30.7322
5.33771	21.8889	89.2417	96.2304	9.95295	18.0923	30.3285
5.24386	22.2911	85.2614	95.5252	10.2392	17.7522	30.5816
5.35637	25.9156	88.2512	93.6189	9.73437	17.4199	30.0726
5.54471	26.7172	87.4397	94.1535	9.95052	17.9606	30.2414
5.71094	27.548	86.7148	94.6024	9.78908	17.5911	30.0112
5.1878	27.6966	85.9168	95.1278	10.0014	17.836	30.4728
5.91627	28.4734	91.1276	99.0192	9.94838	17.2867	30.3198
5.33899	21.3107	87.5036	92.6509	10.0884	17.8294	29.9195
6.04995	22.1096	91.6058	96.2521	9.71438	17.5833	30.4865
5.83896	23.7578	86.3237	93.0132	10.2601	17.3451	30.5673
5.1359	25.1537	82.7833	90.0584	10.0521	17.7253	31.0456
5.31532	26.155	89.0178	97.6582	9.98476	18.4224	30.8537
5.66492	27.3241	88.0532	95.2377	9.80652	17.6285	30.327
5.73092	26.3287	87.6992	95.1618	9.83503	17.7943	30.1197
5.52301	25.8414	87.1355	94.3346	10.1617	17.6356	29.5247
4.901	25.7855	83.7967	89.8516	9.80646	17.6127	30.1704
4.96595	25.4836	84.1755	89.6366	9.80648	17.6837	31.1638
5.52997	27.0566	87.4137	93.1548	10.3134	17.814	30.2708
5.44933	26.93	87.2536	94.5406	9.95718	17.5743	30.6342
5.47906	26.7718	87.8423	95.1292	10.0794	16.491	29.6359
5.47759	27.4853	85.6553	94.1935	9.94433	17.9595	29.7963
5.79812	26.8419	86.1382	95.254	9.62494	17.3974	29.56
4.97447	25.3044	83.0912	88.8384	10.3071	17.2201	30.5426
4.95304	25.9196	83.861	89.2889	9.26104	17.4662	30.7685
4.91831	25.4616	82.8139	89.3391	10.0319	17.98	30.0645
4.95553	25.7177	81.8472	89.6001	9.9575	17.8717	30.1447
5.27868	26.3381	84.337	89.8185	9.88976	16.8959	29.8157
5.07975	25.8795	84.1259	90.055	8.78504	17.9673	30.0055
4.98343	24.9175	82.9439	89.432	10.1727	18.2916	30.7577
4.95313	26.1798	83.004	90.444	9.72697	17.9169	30.4016
5.30446	25.8851	82.6038	92.5071	9.94469	17.7625	30.937
5.19566	25.9953	83.1403	89.5671	9.44504	17.9544	30.4453
5.27294	26.0776	82.6709	91.1605	9.90784	17.7042	31.1067
5.00044	26.1399	83.648	89.2086	8.91536	17.9037	30.9089
5.09319	26.5047	82.4983	90.1843	9.75515	17.9478	29.8624
5.04657	24.6914	82.6654	90.0472	9.52003	17.9023	30.1751
4.95404	25.9966	81.9373	91.5531	9.01762	17.0945	29.9819
5.35084	25.774	81.7867	90.336	10.004	17.7179	30.563
5.5579	26.2955	87.7259	95.0799	9.62222	17.571	30.4002
4.96532	25.8734	80.5108	88.0956	10.4381	17.7865	30.3293
5.10249	25.9806	81.9777	90.4702	9.83328	17.7538	30.2286
5.02861	26.0228	83.9224	88.9599	8.57449	17.3798	30.1071
5.42916	25.5741	88.6798	93.5282	9.82584	17.609	30.0542
5.76699	28.0632	87.3706	93.7553	9.45612	17.9997	30.5158
5.74852	26.1774	86.7552	90.1412	9.91296	17.7156	30.3439
5.10457	26.8669	85.5701	93.2878	9.62504	17.2241	30.1028
5.58933	26.8542	87.0282	94.4943	10.0567	18.2156	30.0024
5.34537	26.2002	86.2504	93.7544	10.1847	17.986	30.3064
5.59806	27.449	87.0296	95.2957	9.78143	17.6653	29.9349
5.22032	27.1321	87.0949	95.0823	9.84924	17.2872	30.7583
5.32501	26.7656	87.3906	94.2015	9.9178	18.0648	30.114
5.27977	27.0202	88.4765	92.0674	9.74897	17.4837	30.2832
5.27795	22.1678	87.3335	92.6822	9.03006	17.8186	30.2989
5.33793	20.2031	87.4105	96.7148	9.87077	17.7397	30.2558
5.71443	23.0779	88.0478	95.9608	9.64657	18.2801	30.4411
4.58346	18.4021	88.5933	97.2289	10.3039	17.4713	30.6969
5.37987	21.3535	88.877	96.6991	10.1026	17.7226	30.0734
5.80394	21.4182	86.6152	94.1609	10.151	16.4834	30.4742
5.56714	21.3233	86.7134	94.298	10.1006	17.6436	30.8749
5.43679	24.9982	86.9578	92.152	10.0173	17.36	30.7831
5.65798	26.6478	87.881	97.2832	10.6778	18.2593	30.3388
5.34804	22.7224	86.8599	94.2544	9.99571	18.2263	30.7202
5.19146	23.8645	88.5388	92.1446	9.80068	17.21	31.2974
5.41853	22.5841	88.6527	96.0591	9.73008	17.9291	29.1087
4.97256	20.4436	87.6877	95.4764	9.6005	17.1634	30.5982
5.57401	25.3927	91.9208	99.4322	9.44389	18.1455	30.1882
5.51917	25.3601	88.0671	94.3522	9.84932	18.0029	29.9225
5.62218	27.0889	88.0559	94.9055	9.69781	18.0587	30.5627
5.45294	19.9527	87.4795	95.852	9.54148	18.2247	30.6844
5.69819	21.8627	86.6366	94.5247	10.0564	17.1269	31.4517
5.1644	21.4577	88.5411	95.8346	10.1762	17.7338	29.2084
5.26784	18.8487	88.4059	95.48	10.1306	17.5359	30.2741
5.09322	17.6457	87.5344	94.1565	9.62208	18.2258	30.5803
5.10603	17.7536	87.6269	95.2387	9.94797	17.8423	31.1126
5.21189	19.5404	86.8266	95.9308	9.65214	17.8036	31.1034
5.45168	19.0809	89.4643	95.9713	10.0229	17.793	29.9966
5.06751	18.3889	89.2648	97.7633	10.2902	17.8265	30.2511
5.3119	17.9956	89.2837	97.1395	9.71462	18.3787	31.2814
5.10501	17.5059	89.2967	96.6639	10.3151	18.1849	30.6334
5.02438	17.762	88.5521	94.5087	10.2077	18.2011	30.5249
5.591	25.3656	88.234	95.637	9.70872	17.0785	30.2489
6.17852	23.694	89.6843	97.174	10.062	17.2916	29.3407
5.54506	24.406	86.7914	95.8904	10.0963	17.9058	31.0814
5.48823	25.2012	87.5238	96.4139	10.0533	17.85	30.8086
5.5469	26.0568	87.859	94.7456	9.9124	17.4279	30.537
5.3876	25.1945	84.7317	94.9906	10.192	17.5503	30.4919
4.92811	26.2335	88.2835	95.9362	9.67264	18.2001	30.6097
5.30509	26.4904	88.2074	97.0262	9.86027	17.978	30.2498
5.59853	24.2409	86.5434	94.3029	9.95594	17.6643	30.5125
5.62907	26.8571	88.672	92.9528	10.023	17.9006	30.144
5.24293	25.2904	89.108	93.8111	10.8619	17.2551	30.3849
5.54695	26.243	88.0848	95.4252	9.56669	17.5239	30.8364
5.4001	25.3312	86.6034	93.006	9.69329	17.885	30.8161
5.45305	26.558	86.7454	91.3744	9.87238	18.0944	31.0394
5.8351	26.2408	88.1252	91.6718	10.1865	17.9871	29.8961
5.28594	27.4008	87.171	94.6866	9.99516	17.5798	29.1724
5.34813	27.4873	86.8369	92.8875	10.0334	17.9444	30.1871
5.62792	26.5273	89.9755	94.8017	9.84559	17.7623	31.3793
5.38627	26.0049	85.7223	92.9917	9.66295	18.2742	30.6041
5.14513	22.7115	86.5438	92.8301	9.15027	17.8072	30.2455
5.5025	23.7121	87.9186	96.1949	9.90004	17.598	29.9172
5.52384	21.4832	88.1573	94.7887	9.41177	17.7536	29.832
5.26741	23.7985	87.5679	94.9004	9.73688	17.694	29.9215
5.21309	23.1993	87.3465	92.0057	9.65409	18.0027	30.6365
5.42522	26.027	87.6294	95.0816	9.92644	18.1157	29.3634
5.45311	25.7786	86.127	93.0598	9.91062	17.8425	30.8421
5.29511	26.7522	85.6929	94.8668	10.1133	17.668	30.4203
5.4818	27.0141	84.6014	93.5031	9.99289	18.5133	30.4172
5.42814	25.8673	86.2415	93.2741	9.69673	17.1469	29.9523
5.523	26.8515	88.1257	94.081	9.66438	17.6283	29.3412
5.23539	27.1563	87.8204	94.1668	9.89651	17.6445	29.1486
5.41917	26.4708	86.8597	91.8673	9.85288	17.5678	30.617
5.05969	26.7429	87.057	94.4966	9.85865	17.8783	30.0169
5.59314	26.6826	85.1712	94.5587	10.196	17.1501	30.2671
5.2806	27.3307	86.8016	92.7068	9.99716	17.3794	29.847
5.81792	27.9054	92.1504	98.0335	9.93466	17.236	30.3323
5.37999	21.9937	85.1359	94.5343	10.1229	17.7819	29.8501
5.29588	20.1158	87.0831	95.4096	9.89392	17.9648	29.9967
5.08721	22.3524	86.2554	94.4324	10.1171	17.4499	29.9167
5.29629	27.8021	86.3423	93.7863	9.97557	17.5731	29.8126
5.69541	26.9915	86.5237	92.9274	10.0821	17.5282	30.3445
5.02521	27.1871	87.4404	95.5134	10.0465	17.9107	29.2081
5.16529	22.6289	87.6847	93.2162	9.76761	17.4974	30.0266
5.13107	23.32	87.2164	95.6006	9.72849	17.1749	29.9077
5.64635	27.7314	87.4991	95.6045	9.77398	17.6452	30.9709
5.54086	26.5101	86.9815	93.5555	9.97652	18.0056	30.8967
5.46039	26.5667	87.1798	93.4034	10.0022	17.7391	30.5757
5.34535	26.9723	87.8734	94.7655	10.0737	17.9765	30.7661
5.46174	25.5969	88.5687	94.0007	9.91442	17.8544	30.4773
5.60364	27.1611	86.5658	94.0434	9.81783	17.7113	31.2181
5.69585	27.3884	87.7796	93.154	10.2384	17.5729	29.6708
5.44193	27.9402	86.8698	93.8149	9.93913	17.7464	30.7302
5.68851	22.4998	89.9976	99.2977	9.74452	17.9979	29.47
5.92252	28.98	91.3662	98.7018	9.29637	17.5778	30.4317
5.45903	27.2144	87.1573	94.1426	9.92669	18.0575	30.2983
5.78611	29.0552	91.7733	98.6575	10.0446	18.1199	30.3885
5.74074	28.7672	91.3959	95.8631	9.94049	17.9783	30.1839
5.93799	28.0555	92.0596	99.7136	9.31871	17.9912	30.0793
5.25921	27.0741	88.2088	92.6871	10.08	17.383	30.6265
5.46313	26.0728	86.1089	93.5993	9.95595	17.271	30.7991
5.56738	26.8694	86.4629	93.3711	9.80053	17.6284	30.5172
5.93879	28.2356	91.0489	98.5168	9.85746	17.6847	30.7152
6.00827	28.2098	90.2952	97.9906	9.82382	17.2788	29.5909
5.87268	28.4777	90.3306	98.5104	8.54004	18.1349	29.9787
5.75798	28.4152	92.9546	102.984	10.0165	18.2816	30.66
6.03116	27.7408	91.5802	99.1535	9.59655	17.4735	30.2602
5.95227	28.2487	92.0351	99.4865	9.55489	17.4985	30.3608
5.82991	28.5253	90.4894	99.3325	10.1345	17.0259	29.6468
5.73091	28.5245	91.4797	98.8779	10.2947	17.6987	30.1329
6.06128	27.752	91.7872	99.6243	9.80433	17.9775	30.3185
5.86132	27.9111	91.6871	99.9402	9.83557	17.6681	29.3232
5.54792	28.6834	91.6002	99.8064	9.96351	17.7269	29.4219
5.48977	29.1786	90.9111	96.5247	9.8997	17.8514	29.8304
5.60606	27.3564	89.4988	99.6708	9.77087	17.7196	30.5403
6.18284	27.8377	88.702	98.6194	9.77073	17.7632	29.8746
5.7736	28.7333	90.4123	98.1644	9.75131	17.4283	30.6291
5.91604	28.2809	89.7116	98.78	10.1496	17.8153	30.3289
5.62617	26.6314	89.8066	99.5944	9.69747	17.3971	29.7604
6.11096	25.0095	92.1152	97.5597	9.30997	17.4295	29.3602
5.97585	25.5776	91.0928	96.5662	9.87255	17.1309	30.1076
5.74649	24.8846	90.9572	97.6095	9.7738	18.1685	30.097
5.80698	25.7736	91.9958	98.3237	10.1924	17.9089	29.8379
5.81496	21.8685	92.037	99.2193	10.0416	16.8088	30.6083
6.09215	22.4206	91.2162	97.4195	10.4822	18.1106	30.31
5.86293	22.3582	90.1484	98.5888	9.9481	17.6155	30.3659
5.77414	25.218	90.534	99.114	9.97681	17.5941	30.0224
5.93316	23.3809	92.8014	98.6314	9.64828	18.0761	30.6175
5.84845	24.9904	91.8445	100.146	9.98781	17.3725	30.1851
5.75267	21.7441	90.1871	97.3821	9.41498	17.2126	30.3794
5.6879	21.711	92.0149	98.4848	10.1529	18.384	29.3786
5.8319	22.554	91.1708	99.3286	9.70842	17.6614	30.1939
5.83131	20.5708	91.1851	98.9037	9.84326	17.2238	30.706
5.39214	20.6212	88.4754	94.8973	10.2229	17.7457	30.3939
5.90656	27.0188	92.5724	99.1799	9.84123	17.9194	30.3174
5.59964	23.5775	85.2871	93.3551	10.01	17.2077	30.5514
5.35276	26.3782	86.6832	94.0608	9.87851	17.6333	30.2702
5.36806	27.0666	87.2932	96.2244	10.0525	17.8171	29.8693
5.56517	27.5594	86.8592	94.2891	9.77446	16.3684	30.0532
5.47282	27.668	88.3509	96.1976	9.80039	17.5624	30.388
5.59299	26.6278	87.3794	97.3481	10.1149	17.6764	30.4221
5.67389	27.8591	90.4479	99.585	10.2952	18.2544	29.6588
5.33765	28.2594	93.0275	99.3148	10.0367	17.5373	30.363
6.07627	29.0767	91.9282	100.736	9.83941	17.323	30.6526
6.07647	28.6524	91.9434	102.309	9.65303	18.6584	31.1034
6.07652	26.726	92.6761	99.5514	9.89947	18.1424	30.5063
6.3582	22.8625	93.2791	98.9141	9.73316	17.7019	31.139
6.11634	24.7807	93.1099	100.717	9.95307	18.101	30.8552
5.71779	28.3896	91.3743	99.6689	9.91112	17.3026	30.0741
5.60174	24.6348	90.9258	100.307	9.77618	17.8793	31.0095
5.51598	26.4631	88.5515	93.0212	9.5609	17.8616	30.7609
5.26783	26.8059	87.5988	95.8436	9.72735	17.7269	29.4252
5.68814	28.4912	91.8844	96.5265	9.87866	17.5159	29.8476
5.89736	28.7795	90.6531	98.2187	9.76503	17.775	30.7873
6.01573	27.9618	92.6691	98.5359	9.93189	17.8151	30.1371
5.59294	27.2155	86.9987	96.8386	9.52004	17.5214	30.1374
5.05102	25.0508	85.8998	95.7099	10.0956	16.3805	30.7616
6.56311	27.7624	89.879	98.7838	10.2611	18.0295	30.6664
5.96403	28.6644	91.5066	100.071	9.65825	17.7809	30.2733
5.75407	25.5721	91.1004	96.8601	9.94002	17.5877	30.2499
5.8339	25.8234	91.3909	100.048	10.1971	17.5051	30.0218
5.90678	27.1296	92.7654	99.186	9.81525	18.0094	28.9904
5.84192	25.9785	89.7729	99.4405	10.0063	18.1074	30.7422
5.758	25.6731	91.9693	96.8092	9.45361	17.5773	31.8279
5.21877	25.3416	88.3355	94.6902	10.0624	17.9363	30.6428
5.76017	25.3133	88.5173	95.6335	9.69265	18.3495	30.2841
5.57309	26.3855	92.1459	99.6688	9.85908	17.6527	29.713
5.95715	24.1792	91.6928	97.2487	9.84257	17.6719	30.0272
5.34676	28.7351	93.5503	95.9104	10.1029	16.3949	28.6258
5.90544	24.8336	90.4415	97.2382	9.555	17.9167	30.1123
5.31322	26.6011	87.7176	92.5782	9.68095	17.4664	30.2946
5.75788	28.0564	92.4122	99.7765	10.2157	17.3555	30.6097
5.62802	25.2682	86.5846	94.7643	10.3363	17.7457	30.3458
5.43107	26.6482	86.5853	93.8692	9.98634	18.1299	30.5534
5.42305	27.7299	86.6308	94.7908	9.80821	17.9111	30.6537
5.24461	25.9604	84.3837	93.8905	10.2681	17.8941	29.736
5.24054	27.4267	87.784	93.6157	9.71704	17.8397	30.0498
5.40088	26.2284	87.7443	93.0576	10.0127	18.2092	30.76
5.15637	26.4852	88.3047	95.5616	10.0528	17.4981	30.0637
5.91137	26.9605	92.3185	98.4647	9.83984	17.3096	30.234
5.31217	21.7701	86.3988	95.7264	9.9519	17.833	29.6006
5.64847	26.5331	87.9437	94.3212	9.38236	17.4868	29.733
5.67273	27.6262	87.9118	93.3536	10.0791	18.2351	29.7688
5.52805	26.8193	87.9912	95.9098	10.2927	17.7349	30.1303
5.41015	27.4111	87.6268	93.0663	9.37541	17.671	29.5061
4.92845	24.55	86.5277	94.6827	10.0988	17.8753	31.2345
5.54948	27.006	85.4454	92.4072	9.89444	17.9288	31.0803
5.25518	27.1758	85.581	93.7132	9.08678	17.8809	29.6357
5.4852	26.5682	87.0868	95.0258	9.82078	17.8472	30.4604
4.92807	27.0788	83.5552	90.9706	10.0081	18.1252	30.0684
5.02502	26.5307	82.2978	91.5437	10.0814	17.8032	30.6131
5.05556	26.0298	83.5283	90.362	9.90704	17.465	30.736
5.34242	27.077	87.2291	95.306	9.84549	17.7555	29.9828
5.23284	25.8919	83.4038	91.9951	9.85713	18.0302	31.1402
5.13545	19.3297	84.4805	90.4914	10.1596	17.575	30.3993
5.09732	25.0733	83.792	88.4363	9.897	18.0408	28.9338
5.12946	25.3525	81.0255	88.9131	10.0149	18.3492	30.6671
4.99706	25.9324	83.2322	89.0685	9.95882	17.6433	30.4095
4.70831	25.64	82.8005	91.4842	9.70134	18.2232	30.5192
5.05055	26.4684	83.5551	90.7143	10.2147	17.831	30.177
5.14589	26.0515	82.4433	89.2984	9.79908	17.3655	30.4091
5.0529	25.4636	82.2177	90.1266	9.7823	17.4477	28.8479
4.81908	26.1948	82.8624	89.2852	10.176	18.1221	29.6409
4.84997	24.4053	85.6794	90.665	9.97534	17.4666	29.934
5.23289	25.5946	83.8656	91.3065	9.82149	17.826	29.9215
5.16317	26.2504	82.4939	90.5202	9.92067	17.3712	30.5222
5.71756	26.8359	87.1813	92.2907	10.0384	17.7397	30.6293
5.09715	25.1112	82.442	91.1734	9.5326	17.625	30.5687
5.40556	27.1756	87.0022	96.1507	9.96026	16.9013	30.0971
4.92436	25.7616	83.3837	91.6018	9.49161	18.1792	29.3435
5.25377	25.6331	87.6621	92.3536	10.3336	17.6862	30.0846
5.32071	25.7337	87.7929	93.9671	10.0491	17.3217	29.6298
5.57819	26.2902	88.3404	94.8175	10.0207	17.6959	30.3592
6.2523	28.5728	92.3863	99.707	9.31642	18.0476	30.0017
5.99031	28.4581	91.5944	96.9599	10.0959	17.958	28.6403
6.0736	28.6088	92.3837	98.2433	9.99019	18.1335	31.0418
5.67904	28.5094	90.961	98.1149	10.1791	17.707	29.7307
5.99888	23.3058	91.5352	97.0227	9.83233	17.8918	30.1184
5.60088	28.3992	91.6651	100.646	9.67102	17.8469	30.1629
5.95029	28.187	89.0426	98.7861	9.52781	17.5624	29.9291
5.71108	28.4105	90.9702	100.857	10.1235	17.5045	30.9964
5.83746	27.8259	91.6236	100.072	9.72839	17.708	30.2376
5.83031	28.4974	90.0409	100.57	9.695	17.7101	30.5526
5.83223	28.6641	92.1816	97.6073	9.60745	18.4824	30.5753
6.04707	28.4319	91.7333	99.2219	9.73369	17.3788	29.106
5.72299	28.5932	89.9862	97.2057	9.84032	17.7097	30.7615
5.1896	26.3828	87.5167	96.1136	9.55058	17.7539	29.6617
5.58475	27.9947	91.4597	99.7916	9.66144	18.0626	29.3341
6.15941	27.6086	93.5087	100.495	9.7881	17.8962	30.3745
5.78764	27.7349	91.0117	98.3399	9.95804	17.729	30.2516
5.97054	25.2207	90.1951	99.2338	9.84126	17.0925	28.9804
5.52713	26.1142	91.4505	97.3131	9.9098	18.0394	28.8924
5.27953	19.3005	90.0416	101.7	10.0389	17.535	30.3885
5.52367	21.9607	91.9739	99.61	9.70276	17.2174	30.8101
5.14666	22.1848	90.5001	99.282	10.3315	16.7883	29.9351
5.92804	24.0958	91.9307	98.7957	9.97187	18.1232	30.9979
5.90954	23.5835	93.4926	99.0988	10.1149	17.8258	30.2932
5.14469	23.9972	87.0197	93.4836	9.67238	17.5446	30.2703
5.41239	26.5296	88.2014	96.0035	9.97146	17.9231	29.7737
5.14103	26.8832	86.7148	93.4245	9.68944	17.482	30.2532
5.83462	27.5089	91.3009	100.441	9.80198	17.7698	31.7152
5.50542	27.4539	87.0838	94.4024	9.57884	17.642	29.172
5.00183	26.9591	88.8739	94.9337	10.0321	17.9817	29.8931
5.68612	26.1791	85.4463	94.7725	9.93971	17.5475	30.5504
5.78525	27.1111	87.6044	93.9328	9.95664	17.2879	30.8506
5.29647	26.3274	87.8712	93.7523	9.86303	17.9368	30.3056
5.29695	26.9737	87.5175	95.8033	9.85563	17.3511	29.9902
5.10484	25.2738	88.0422	94.7964	9.841	17.473	30.2959
5.53237	21.5392	86.6172	93.5556	9.84475	17.5928	29.5326
5.89439	25.9033	90.6354	100.554	9.77286	17.7753	30.588
5.77652	24.0414	91.1893	98.987	9.79271	17.5981	30.6383
6.20501	28.4553	90.9334	100.848	9.87102	18.0045	29.8708
5.72407	27.5498	90.9792	99.2536	9.75858	17.8486	30.5484
5.42504	19.0566	85.5389	93.3768	9.92363	18.0223	29.9726
5.71955	22.9388	91.1767	106.7	9.99894	17.6479	31.123
5.68628	24.5534	90.142	96.125	10.2413	17.6401	30.2215
5.28402	26.2871	86.9141	94.7559	10.2227	17.4319	30.2062
5.83244	26.6313	92.1921	101.033	10.0175	17.8283	31.0414
5.63797	25.3727	92.6703	94.9293	9.65581	17.8191	30.4541
6.11428	26.3702	92.149	100.1	10.1152	18.0086	29.8763
5.24021	27.7283	87.9418	94.6597	9.69166	18.0107	31.0774
5.64904	23.5326	91.3374	97.907	9.77768	18.6825	31.2424
5.2045	25.316	86.546	93.7519	10.1001	18.398	30.8972
5.09164	25.2153	84.0724	91.2281	9.98405	17.6326	31.0344
5.10702	23.5207	82.2039	89.7899	9.74193	18.02	30.9488
5.17686	23.4087	83.657	90.1804	10.0301	17.8786	29.9818
5.14156	23.3008	82.6985	91.1411	10.1306	18.1517	30.9324
5.51694	27.361	88.4689	94.2021	9.66398	17.9458	30.8262
5.02643	25.3331	83.8713	90.7346	10.1096	17.2601	30.6535
5.47401	25.0253	87.777	94.0788	10.2942	18.1765	30.7961
5.35479	27.1465	89.2978	94.1087	9.64575	17.3469	30.3572
6.1362	28.6067	94.1374	100.387	9.90612	17.8428	30.7024
5.40773	23.914	87.229	95.2541	9.98247	17.9469	29.9681
5.75319	28.9733	92.2961	98.8702	10.0659	17.6747	30.6203
5.69371	28.1058	90.2537	99.1179	9.82157	17.5864	30.409
5.47072	27.1392	87.0324	96.8514	9.80309	17.5788	29.7229
5.75816	25.1023	87.3747	96.1255	9.2937	17.9134	31.0112
4.96916	25.7152	84.2988	89.5707	10.0008	17.4537	30.1903
5.61879	20.2677	88.9641	95.1425	9.6087	17.9454	30.3041
5.52038	27.2829	86.163	94.9308	9.79933	18.1412	30.1358
5.61434	22.9209	88.0624	94.808	10.066	18.1775	30.4542
5.34993	20.2273	86.2945	96.5022	9.79386	18.1977	30.4223
5.17912	27.4946	86.9884	93.6758	9.96282	17.8856	30.9284
5.51768	25.3211	86.8394	96.5285	9.67394	17.2739	30.4745
5.76519	22.1215	91.0827	101.53	9.82966	17.3075	30.7718
5.48642	19.7646	88.417	93.1422	10.2924	18.0795	30.7177
5.38882	22.8267	91.8153	99.009	10.0542	18.0647	30.9406
5.87412	27.9999	90.5926	101.145	10.0627	17.7201	30.0771
5.66471	26.0271	91.8966	100.68	9.90519	17.7304	31.2889
5.66416	27.2664	87.6872	95.634	9.53811	18.0076	30.1373
5.45403	26.8163	87.8295	95.3935	10.1606	17.8624	30.9933
5.70307	24.8873	85.0148	94.1647	10.0226	17.5348	30.7701
5.23012	24.6569	88.228	94.7737	9.97885	17.8422	30.6119
5.76742	25.3395	88.3465	96.2446	11.0041	17.8261	30.8333
5.84191	27.3645	90.3948	99.7291	9.88002	17.6457	30.6795
6.1839	27.4538	94.0318	101.057	10.0106	18.027	30.49
6.13805	28.1918	91.8363	99.4176	9.44999	17.885	30.8858
5.75982	27.3832	91.4491	99.5908	10.0547	17.4142	30.6199
6.0218	26.5275	91.2921	100.149	9.76518	18.035	30.08
5.59516	28.0682	93.5729	97.8337	10.2279	17.6439	29.9052
5.80484	28.0059	91.7694	100.009	9.76503	17.6455	30.1014
5.64031	27.1546	92.836	100.447	9.66409	17.8325	30.5644
5.73217	27.4509	90.5876	98.2843	10.0633	17.9962	30.7214
5.23321	28.6559	91.704	100.36	9.90354	18.1901	30.7897
6.14303	28.476	91.3698	99.4926	10.2581	17.5308	29.7696
5.99123	28.8682	91.7882	101.547	9.84816	17.3656	30.9253
6.06448	27.731	90.7587	98.8284	10.118	17.2784	30.2554
5.46475	27.3585	87.5024	93.5186	9.38005	17.7956	30.7971
5.37837	27.4026	86.7967	95.5337	9.68861	17.5848	30.0885
5.29577	28.3912	92.8741	98.6238	10.0102	16.9653	30.9943
5.86882	28.2353	92.2182	96.2944	9.6502	17.7416	30.4622
5.56609	26.7751	92.1493	97.7511	9.97452	18.0812	30.0236
5.40797	28.1448	91.9973	99.8755	9.88787	17.7785	30.4351
5.80296	26.7431	88.1182	95.153	9.9573	17.745	30.0504
4.78914	27.4792	87.1057	94.8812	9.75933	16.9624	30.2088
5.83745	27.8186	88.4382	99.6247	9.57151	17.256	29.8795
6.21711	28.0702	90.9948	100.645	9.88246	17.0184	29.6818
5.75975	28.2229	91.3076	98.5909	9.81534	17.2108	29.5493
5.74296	27.4761	90.9502	99.638	9.88307	17.0464	30.05
5.81189	27.2306	90.6246	97.6166	10.2585	16.994	30.1158
5.75783	28.7148	91.2529	99.0366	10.8676	17.5346	29.9156
5.69188	25.0322	91.1046	98.0089	9.83508	18.3584	30.2866
5.92354	27.6843	91.0664	97.6636	9.73166	16.9121	30.756
5.66615	27.219	91.0211	95.5269	9.75546	17.7898	30.1403
6.03692	28.2203	89.9596	98.9066	9.97576	17.7092	29.6895
5.61957	27.2252	88.4317	100.867	9.78525	17.3303	30.8194
6.01409	28.9928	90.7923	96.682	10.0547	17.6973	29.8165
5.72564	26.7325	86.4256	94.9409	9.92723	17.7404	30.3705
6.00649	26.9968	89.7486	99.3251	9.69501	17.0929	30.7538
5.68807	28.5379	90.5701	98.7753	9.45043	17.7777	30.458
5.54405	27.6052	90.2174	99.9342	9.52826	18.1089	30.311
5.69716	28.3826	92.2596	99.3373	9.8501	15.9726	30.4657
6.02288	27.8657	91.5284	100.968	9.9394	18.1769	29.9148
5.60892	27.9385	91.7875	99.4011	10.22	18.2675	30.3129
6.14294	28.3126	89.7009	99.4168	9.97774	18.0611	30.4445
5.82024	27.7826	88.8685	99.1947	9.93997	17.758	29.594
6.0758	27.5931	91.0002	100.131	9.74769	17.5355	30.5819
5.37777	25.5681	86.7591	94.2312	9.4374	17.9267	30.2023
6.0087	28.302	92.6058	97.0104	9.45426	17.6058	30.0253
5.3278	27.0756	91.2359	98.0664	9.55815	17.0981	30.9185
5.64422	26.9597	90.3185	99.6291	9.76307	17.8628	29.7839
6.24846	28.545	91.1786	99.9492	10.1606	18.0697	30.764
5.35533	27.1468	88.3399	96.031	9.93819	17.5335	30.0275
6.07494	28.7397	91.9962	98.6776	9.72003	17.5731	30.7927
5.90874	26.5825	88.097	93.3339	9.45317	17.8617	30.0896
5.45768	27.0886	88.5992	92.3588	10.0014	17.1754	29.7187
6.08347	28.3286	90.03	98.2424	10.06	17.482	30.1232
5.57001	26.0444	87.4857	93.2167	9.73312	17.6389	28.9972
5.72332	28.4691	89.5514	97.1951	9.81965	17.6208	30.0264
5.53189	20.7145	87.8497	95.1315	10.1164	17.8851	29.8337
5.43275	26.1229	88.8884	92.0745	9.625	17.6437	30.4684
4.97742	24.4875	83.23	88.0983	10.1499	17.2537	29.9982
5.37538	27.0688	87.9057	93.8427	10.1095	17.9328	30.5713
5.48797	26.9721	86.5539	93.8945	10.0818	17.3522	30.9978
5.24328	24.8039	86.9332	94.4508	9.71205	17.7341	29.7263
5.56394	27.2368	85.7453	94.9102	10.0087	18.2767	29.536
5.51943	25.9026	87.2008	93.4244	9.91053	18.0587	30.619
5.66628	26.7668	87.0682	94.8646	9.86534	17.051	30.1286
5.41814	26.8057	86.4453	93.4574	9.52018	17.7345	30.1608
5.29556	27.0393	89.0345	93.2945	9.89867	16.9123	31.9809
