# Supplementary material
Source: ML conference proceedings conference paper supplement (https://openreview.net/forum?id=dAYodxl90f)
Supplement: supplementary_material [file VID_084027_acc.xlsx]

## Sheet: Sheet1
m2	m3	m4	m8	y5m	y5l	y5x
0.899526	0.96486	0.970673	0.965141	0.965141	0.965141	0.965141
0	0.840065	0.74447	0.882992	0.882992	0.882992	0.882992
0	0.456371	0.852063	0.842666	0.842666	0.842666	0.842666
0.267447	0.316251	0.60737	0.890033	0.890033	0.890033	0.890033
0.294709	0.277056	0.328502	0.613532	0.613532	0.613532	0.613532
0	0.259905	0.863238	0.786408	0.786408	0.786408	0.786408
0	0	0.859838	0.780886	0.780886	0.780886	0.780886
0	0.480728	0.543523	0.802635	0.802635	0.802635	0.802635
0.28298	0.689924	0.53437	0.523406	0.523406	0.523406	0.523406
0.295977	0.694851	0.611985	0.565666	0.565666	0.565666	0.565666
0	0	0.455261	0.762537	0.762537	0.762537	0.762537
0	0	0.419023	0.443631	0.443631	0.443631	0.443631
0	0	0	0.319867	0.319867	0.319867	0.319867
0	0.666205	0.875628	0.839602	0.839602	0.839602	0.839602
0	0.254237	0.499379	0.477005	0.477005	0.477005	0.477005
0	0.170206	0.735964	0.703167	0.703167	0.703167	0.703167
0	0	0.472431	0.522541	0.522541	0.522541	0.522541
0.804547	0.933526	0.950335	0.909112	0.909112	0.909112	0.909112
0.196767	0.298795	0.312651	0.32144	0.32144	0.32144	0.32144
0.24802	0.301999	0.31889	0.308497	0.308497	0.308497	0.308497
0.247521	0.29109	0.319834	0.491304	0.491304	0.491304	0.491304
0.929463	0.868566	0.939655	0.968871	0.968871	0.968871	0.968871
0.81778	0.920706	0.967109	0.898535	0.898535	0.898535	0.898535
0.871721	0.912888	0.944387	0.912357	0.912357	0.912357	0.912357
0.236193	0.383478	0.439499	0.428163	0.428163	0.428163	0.428163
0.359451	0.468607	0.850546	0.889977	0.889977	0.889977	0.889977
0.278362	0.719948	0.331878	0.871582	0.871582	0.871582	0.871582
0.837227	0.855651	0.918691	0.846267	0.846267	0.846267	0.846267
0.263349	0.315652	0.317042	0.307974	0.307974	0.307974	0.307974
0.29399	0.650464	0.541249	0.692124	0.692124	0.692124	0.692124
0.295667	0.503575	0.576667	0.62387	0.62387	0.62387	0.62387
0.319445	0.752524	0.535947	0.527931	0.527931	0.527931	0.527931
0.452724	0.628532	0.665084	0.652465	0.652465	0.652465	0.652465
0.209451	0.627057	0.662715	0.663155	0.663155	0.663155	0.663155
0.198708	0.202734	0.228287	0.448088	0.448088	0.448088	0.448088
0.737876	0.844175	0.923852	0.901657	0.901657	0.901657	0.901657
0.190681	0.64256	0.692784	0.816818	0.816818	0.816818	0.816818
0.536285	0.890982	0.958999	0.933271	0.933271	0.933271	0.933271
0.103784	0.219478	0.341603	0.568271	0.568271	0.568271	0.568271
0.526036	0.596956	0.881966	0.881686	0.881686	0.881686	0.881686
0.377641	0.585151	0.71869	0.849041	0.849041	0.849041	0.849041
0.16941	0.522605	0.541928	0.499403	0.499403	0.499403	0.499403
0.418793	0.682216	0.722665	0.859596	0.859596	0.859596	0.859596
0.357188	0.540616	0.689442	0.694821	0.694821	0.694821	0.694821
0.310795	0.479718	0.481756	0.804599	0.804599	0.804599	0.804599
0.271537	0.304624	0.297518	0.287491	0.287491	0.287491	0.287491
0.493528	0.76052	0.891281	0.872543	0.872543	0.872543	0.872543
0.184619	0.47902	0.353783	0.84087	0.84087	0.84087	0.84087
0.235735	0.725981	0.899411	0.84674	0.84674	0.84674	0.84674
0	0.809136	0.926608	0.894702	0.894702	0.894702	0.894702
0.304689	0.861952	0.925658	0.890144	0.890144	0.890144	0.890144
0.26126	0.8847	0.936337	0.896209	0.896209	0.896209	0.896209
0.36682	0.629432	0.881299	0.804663	0.804663	0.804663	0.804663
0.237706	0.759176	0.915033	0.951638	0.951638	0.951638	0.951638
0	0.385489	0.885434	0.779678	0.779678	0.779678	0.779678
0	0.416041	0.453875	0.444245	0.444245	0.444245	0.444245
0.227581	0.500567	0.570183	0.554204	0.554204	0.554204	0.554204
0.315695	0.818631	0.906913	0.86341	0.86341	0.86341	0.86341
0	0.826483	0.855259	0.847868	0.847868	0.847868	0.847868
0.353606	0.550859	0.801334	0.844946	0.844946	0.844946	0.844946
0.399504	0.717306	0.872974	0.847237	0.847237	0.847237	0.847237
0	0	0	0.767398	0.767398	0.767398	0.767398
0	0	0	0	0	0	0
0	0.776823	0	0.806246	0.806246	0.806246	0.806246
0.769923	0.959093	0.946105	0.90626	0.90626	0.90626	0.90626
0	0.39578	0.472893	0.439162	0.439162	0.439162	0.439162
0.80892	0.91499	0.953329	0.91371	0.91371	0.91371	0.91371
0.811406	0.732883	0.917514	0.852146	0.852146	0.852146	0.852146
0	0.561562	0.668239	0.803478	0.803478	0.803478	0.803478
0	0	0.559494	0	0	0	0
0	0	0	0.43991	0.43991	0.43991	0.43991
0.368775	0.840276	0.832366	0.906518	0.906518	0.906518	0.906518
0	0.656566	0.634409	0.762542	0.762542	0.762542	0.762542
0	0.69783	0	0.803571	0.803571	0.803571	0.803571
0.826847	0.888721	0.953231	0.942493	0.942493	0.942493	0.942493
0.240144	0.453708	0.533275	0.507658	0.507658	0.507658	0.507658
0	0.751238	0	0	0	0	0
0.907679	0.921928	0.963744	0.921928	0.921928	0.921928	0.921928
0.767161	0.89305	0.935658	0.89194	0.89194	0.89194	0.89194
0.877923	0.888405	0.973856	0.895433	0.895433	0.895433	0.895433
0	0.806818	0.92246	0.950067	0.950067	0.950067	0.950067
0.86848	0.907158	0.96157	0.916847	0.916847	0.916847	0.916847
0.913754	0.926062	0.955749	0.923984	0.923984	0.923984	0.923984
0.775629	0.919075	0.976149	0.93678	0.93678	0.93678	0.93678
0.817161	0.955988	0.947497	0.917827	0.917827	0.917827	0.917827
0	0	0.886438	0.858545	0.858545	0.858545	0.858545
0	0	0.896996	0.849593	0.849593	0.849593	0.849593
0.348838	0.446555	0.890676	0.899399	0.899399	0.899399	0.899399
0.31379	0.32557	0.611595	0.605376	0.605376	0.605376	0.605376
0.886267	0.935446	0.966686	0.963013	0.963013	0.963013	0.963013
0.407194	0.466011	0.870962	0.867697	0.867697	0.867697	0.867697
0.412262	0.868442	0.975909	0.940322	0.940322	0.940322	0.940322
0.846139	0.9327	0.98209	0.929483	0.929483	0.929483	0.929483
0.808631	0.942291	0.975251	0.954033	0.954033	0.954033	0.954033
0.415138	0.469059	0.855616	0.938856	0.938856	0.938856	0.938856
0.167678	0.534866	0.687045	0.676222	0.676222	0.676222	0.676222
0.410942	0.66719	0.910062	0.919968	0.919968	0.919968	0.919968
0.0905492	0.290851	0.477194	0.483265	0.483265	0.483265	0.483265
0.599741	0.704034	0.710138	0.851813	0.851813	0.851813	0.851813
0.783254	0.910142	0.959567	0.918401	0.918401	0.918401	0.918401
