# Supplementary material
Source: ML conference proceedings conference paper supplement (https://openreview.net/forum?id=dAYodxl90f)
Supplement: supplementary_material [file VID_084027_ene.xlsx]

## Sheet: Sheet1
m2	m3	m4	m8	y5m	y5l	y5x
6.46558	25.0055	89.1376	97.4062	10.7581	17.7193	28.6632
5.80148	24.7474	91.3628	97.7684	9.73368	17.7964	28.9446
5.53104	23.9342	87.2577	95.3144	10.2143	16.8172	28.3709
5.69997	24.2599	91.6508	98.8931	9.71397	17.4539	30.1057
5.41781	22.9401	87.0723	91.4104	9.35524	17.2613	30.3838
5.85279	27.9158	90.3573	98.5487	9.68318	17.5639	30.5709
5.64167	25.4049	92.196	99.3795	9.70101	17.713	30.8002
5.93458	26.2558	91.8965	100.576	9.59003	17.8414	30.3346
6.17537	26.6908	92.4086	98.2376	9.83662	17.541	30.2401
5.86251	27.4367	92.6193	97.1703	9.4408	16.8056	30.8295
5.46746	24.106	86.2577	95.2568	9.87933	17.9329	31.6012
5.55824	25.8102	92.6343	100.167	10.1501	17.9295	30.8808
5.12778	23.0139	85.0649	90.7387	9.70885	17.7869	30.9513
5.7412	23.6831	92.4608	97.8894	9.97499	17.8281	30.8437
5.72511	26.5455	92.867	99.1884	9.5853	17.8579	30.1674
5.79634	25.8015	92.9505	99.8117	10.1154	19.8313	29.9005
5.77173	25.2357	91.761	99.7912	9.89374	17.4525	31.1958
6.04391	24.5899	90.816	97.9867	10.0167	17.9462	30.7621
5.87463	26.9978	92.4512	98.8073	9.63423	17.6792	30.0715
5.65269	25.8444	92.9663	97.4428	9.99638	17.8441	30.7797
5.42568	25.6842	91.5802	99.5768	10.1079	16.7536	30.1459
4.70793	22.4033	82.9048	91.3045	9.83516	18.1725	30.0031
5.88834	26.1334	90.9771	97.7094	9.74759	18.3335	30.3972
4.60305	22.1357	83.1809	90.8664	10.0245	17.5361	30.8404
4.9047	22.7774	83.7248	91.0817	9.98527	17.6993	29.6903
5.66007	25.6679	94.5902	99.1182	9.85295	17.306	30.49
5.74011	25.4164	93.2471	99.2022	9.93871	17.9065	30.8208
4.99819	22.6219	86.73	90.4362	10.0435	18.407	30.7748
5.82084	25.9561	92.438	102.496	10.0302	17.0508	31.3548
5.58391	27.4017	92.5314	99.9819	9.44847	18.2186	30.3249
6.06363	26.2894	92.973	99.5633	10.0339	17.7998	29.5094
5.95932	27.0911	92.1381	100.792	9.835	17.2434	30.5892
5.16616	26.0074	89.2231	93.8284	9.79679	18.179	30.5733
5.02222	23.9398	83.0473	90.7809	9.88834	18.5849	31.353
4.67271	23.0096	85.8342	90.4232	9.82367	17.8244	30.0687
5.68596	24.3266	88.2958	95.418	9.82661	18.1901	31.4855
5.37203	24.6109	87.5108	95.8021	10.1819	17.865	31.1545
5.98843	26.9764	90.3095	99.557	9.77959	16.9396	29.696
5.76301	27.5813	92.7823	98.891	9.7307	16.782	31.3078
5.79098	26.7903	93.0983	99.2424	9.55256	18.3543	30.0277
6.24061	26.6147	92.434	97.1851	10.3951	17.5473	30.4167
5.88839	27.3458	93.1563	98.6699	10.2132	17.2519	30.128
5.31178	27.5429	88.1548	95.2954	10.0544	17.8688	30.5668
4.89463	26.903	87.929	95.7579	9.50901	17.7172	30.0888
6.08111	28.0365	91.0397	96.5256	10.0461	17.8482	30.7062
4.70033	26.4297	83.948	91.5822	9.93996	17.793	30.1084
5.99336	26.7353	93.4066	98.8056	9.93881	17.5177	30.4738
5.93608	28.6229	91.3622	100.135	9.73001	17.08	30.3603
5.12133	23.0651	84.066	89.9535	9.86817	17.9684	30.8125
5.79837	27.1809	93.1108	99.4272	9.68104	17.6876	30.3189
6.04862	28.5681	94.1942	99.8809	10.0093	17.5658	29.8403
5.56671	26.4466	97.5244	101.867	10.1159	18.2879	30.4393
5.98316	29.0148	90.1551	100.074	9.75065	17.0286	29.6656
5.52463	27.7454	91.3245	102.074	10.0987	18.0738	31.2163
6.15708	26.8618	93.2583	100.721	9.67134	16.5311	30.7506
5.77065	26.8681	92.7284	101.229	10.0478	17.6575	31.1095
6.02284	27.74	92.8316	98.7824	9.24276	17.1628	30.6698
5.61781	26.3656	90.7353	100.026	10.3352	17.145	30.0997
5.70036	29.0944	92.2796	100.35	10.0099	17.6887	29.6484
5.42174	26.6822	89.3484	95.1267	9.96134	17.7552	31.2648
5.13642	24.6463	87.2925	95.4899	9.8866	18.2345	31.4657
5.0774	21.9162	82.5442	92.3295	9.94732	18.5065	31.1675
4.31847	22.3004	82.8217	91.9241	10.0576	17.7895	30.6678
5.53063	22.6781	88.9679	96.3751	10.3284	17.1825	31.3561
5.33997	25.5105	93.2914	100.085	10.2014	18.1018	30.303
5.37742	24.2164	87.9613	95.7691	9.96306	17.677	29.8539
4.91746	23.582	85.9604	92.1127	10.0233	17.796	30.6098
5.61588	22.7805	89.0503	95.2145	9.83555	18.0851	30.8961
5.54063	24.3267	89.5355	97.7576	10.1902	17.8102	31.1897
4.95893	22.2284	85.7586	90.8656	9.88328	18.0806	30.1092
5.08977	22.6062	83.9501	94.3604	10.3265	18.186	30.8704
5.18809	24.0719	89.795	96.1598	9.82761	17.6724	30.308
5.38949	24.8981	87.3508	97.1428	9.99859	17.9873	31.0557
5.12298	22.186	84.6622	91.4891	9.56528	17.7434	30.4464
5.91791	27.5338	93.8843	100.647	9.80002	17.8877	30.2425
5.77761	27.3055	92.587	101.405	9.84244	18.2809	31.6211
5.65465	25.6097	94.0224	98.5793	9.69041	17.8685	31.3725
5.89792	24.9964	92.5807	98.959	9.9198	17.8151	30.8069
6.04326	26.0382	93.1551	99.5689	10.0739	17.7439	30.9326
5.58069	24.3561	89.9366	94.2972	9.88598	18.1689	30.5397
5.08967	20.7683	83.8561	91.7844	10.0297	17.8942	30.7193
5.90691	26.3022	94.0513	100.506	9.62355	17.5493	31.2401
5.91627	26.005	92.3468	101.4	9.99133	18.235	30.44
5.83616	24.9453	95.0358	100.132	9.82772	17.146	30.7667
4.60294	23.4534	85.3668	92.4855	10.605	18.0887	30.156
5.99641	24.7622	90.5166	99.4711	9.95	18.2272	30.7141
6.4033	25.3668	92.5109	99.0702	9.84247	18.123	30.4655
5.90316	24.837	93.4836	100.288	9.74598	18.4506	30.3485
5.17323	24.4228	89.0701	98.3035	9.86816	17.9281	30.9706
5.50623	24.0557	88.7511	95.7755	9.62716	18.0479	30.427
5.25752	25.4857	89.3746	97.0499	9.99555	18.3341	30.8669
5.49485	26.1991	90.0205	94.4623	10.5318	18.2956	30.8305
5.41866	25.7283	89.3608	96.4265	10.054	18.0918	30.4322
5.42793	24.8064	90.2069	93.2268	9.72673	17.0272	31.021
5.55808	24.5143	88.7122	100.476	10.0216	17.7776	31.1322
6.26259	28.3939	91.6748	100.87	9.94646	18.2734	30.9994
5.94041	28.4023	92.0808	101.36	10.0306	17.3007	30.7762
6.00415	28.6469	92.8206	98.5069	9.87069	17.5382	28.6309
5.42324	26.5439	87.7738	96.2133	9.79881	17.689	30.2985
5.34542	27.0765	90.2744	94.4252	9.9228	17.9266	31.3394
