# Supplementary material
Source: ML conference proceedings conference paper supplement (https://openreview.net/forum?id=dAYodxl90f)
Supplement: supplementary_material [file VID_084027_nextacc.xlsx]

## Sheet: Sheet1
m2	m3	m4	m8	y5m	y5l	y5x
0	0	0	0	0	0	0
0	0	0	0	0	0	0
0	0	0	0	0	0	0
0	0	0	0	0	0	0
0	0	0	0	0	0	0
0	0	0	0	0	0	0
0	0	0	0	0	0	0
0	0	0	0	0	0	0
0	0	0	0	0	0	0
0	0	0	0	0	0	0
0	0	0	0	0	0	0
0	0	0	0	0	0	0
0	0	0	0	0	0	0
0	0	0	0	0	0	0
0	0	0	0	0	0	0
0	0	0	0	0	0	0
0	0	0	0	0	0	0
0	0	0	0	0	0	0
0	0	0	0	0	0	0
0	0	0	0	0	0	0
0	0	0	0	0	0	0
0	0	0	0	0	0	0
0	0	0	0	0	0	0
0	0	0	0	0	0	0
0	0	0	0	0	0	0
0	0	0	0	0	0	0
0.504971	0.734587	0	0.692888	0.692888	0.692888	0.692888
0.223596	0.220306	0.214453	0.234447	0.234447	0.234447	0.234447
0.178754	0.226983	0.215115	0.205811	0.205811	0.205811	0.205811
0	0	0	0	0	0	0
0.16871	0.17332	0.181002	0.184978	0.184978	0.184978	0.184978
0.129993	0.131501	0.126546	0.128584	0.128584	0.128584	0.128584
0	0.133398	0.141907	0.139368	0.139368	0.139368	0.139368
0.190149	0.184062	0.194522	0.190936	0.190936	0.190936	0.190936
0.781297	0.810353	0.912492	0.923356	0.923356	0.923356	0.923356
0.185208	0.211461	0.233405	0.22586	0.22586	0.22586	0.22586
0.254242	0.281799	0.314763	0.30643	0.30643	0.30643	0.30643
0.105329	0.12146	0.131307	0.129305	0.129305	0.129305	0.129305
0.239388	0.28636	0.31137	0.302435	0.302435	0.302435	0.302435
0.174566	0.187657	0.204061	0.194466	0.194466	0.194466	0.194466
0.148033	0.145626	0.155802	0.148614	0.148614	0.148614	0.148614
0	0	0	0	0	0	0
0.0873705	0.0921632	0	0	0	0	0
0.11923	0.141208	0.145709	0.141262	0.141262	0.141262	0.141262
0.0947879	0.113888	0.107801	0.111169	0.111169	0.111169	0.111169
0	0	0	0.169284	0.169284	0.169284	0.169284
0	0	0	0	0	0	0
0	0	0	0	0	0	0
0	0	0	0	0	0	0
0	0	0	0	0	0	0
0	0	0	0	0	0	0
0	0	0	0	0	0	0
0	0	0	0	0	0	0
0	0	0	0	0	0	0
0	0	0	0	0	0	0
0	0	0	0	0	0	0
0	0	0	0	0	0	0
0	0	0	0	0	0	0
0	0	0	0	0	0	0
0	0	0	0	0	0	0
0	0	0	0	0	0	0
0	0	0	0	0	0	0
0	0	0	0	0	0	0
0	0	0	0	0	0	0
0	0	0	0	0	0	0
0	0	0	0	0	0	0
0	0	0	0	0	0	0
0	0	0	0	0	0	0
0	0	0	0	0	0	0
0	0	0	0	0	0	0
0	0	0	0	0	0	0
0	0	0	0	0	0	0
0	0	0	0	0	0	0
0	0	0	0	0	0	0
0	0	0	0	0	0	0
0	0	0	0	0	0	0
0	0	0	0	0	0	0
0	0	0	0	0	0	0
0	0	0	0	0	0	0
0	0	0	0	0	0	0
0	0	0	0	0	0	0
0	0	0	0	0	0	0
0	0	0	0	0	0	0
0	0	0	0	0	0	0
0	0	0	0	0	0	0
0	0	0	0	0	0	0
0	0	0	0	0	0	0
0	0	0	0	0	0	0
0	0	0	0	0	0	0
0	0	0	0	0	0	0
0.377515	0.404084	0.425304	0.399586	0.399586	0.399586	0.399586
0.410706	0.464945	0.49434	0.481545	0.481545	0.481545	0.481545
0.861316	0.928151	0.986681	0.947136	0.947136	0.947136	0.947136
0.399738	0.474829	0.480166	0.473339	0.473339	0.473339	0.473339
0.1686	0.186875	0.198089	0.190091	0.190091	0.190091	0.190091
0.209213	0.238196	0.24642	0.239651	0.239651	0.239651	0.239651
0.0969262	0.104456	0.109317	0.10543	0.10543	0.10543	0.10543
0.205311	0.239506	0.243829	0.23644	0.23644	0.23644	0.23644
0.295594	0.312638	0.32891	0.313446	0.313446	0.313446	0.313446
